# Supplementary material for: Electrophilic alkylation of arenes with 5-bromopyrimidine en route to 4-aryl-5-alkynylpyrimidines
Source: Royal Society of Chemistry journal article supplement (doi:10.1039/d0ra01335h), 2020-01-01
Supplement: d0ra01335h1.pdf [file d0ra01335h1.pdf]

## Electrophilic Alkylation of Arenes with 5-Bromopyrimidine en route to 4-Aryl-5-alkynylpyrimidines

Stanislav S. Shcherbakov,<sup>\*a</sup> Artyom Yu. Magometov,<sup>a</sup> Viktoriia Yu. Shcherbakova,<sup>a</sup> Alexander V. Aksenov,<sup>a</sup> Dmitriy A. Domenyuk,<sup>b</sup> Vladimir A. Zelensky,<sup>b</sup> and Michael Rubin<sup>\*ac</sup>

*a.* Department of Chemistry, North Caucasus Federal University, 1a Pushkin St., Stavropol 355009, Russian Federation. E-mail: [alexaks05@rambler.ru](mailto:alexaks05@rambler.ru)

*b.* Department of General Practice Dentistry and Child Dentistry, Stavropol State. Medical University, 310 Mira Street, Stavropol 355017, Russian Federation.

*c.* Department of Chemistry, University of Kansas, 1567 Irving Hill Road, Lawrence, KS 66045-7582, USA. Tel: +1-785-864- 5071, E-mail: [mrubin@ku.edu](mailto:mrubin@ku.edu)

## Supporting Information

### Table of Contents

|                                  |    |
|----------------------------------|----|
| Spectral Data .....              | 2  |
| X-Ray Crystallography Data ..... | 44 |

# Spectral Data

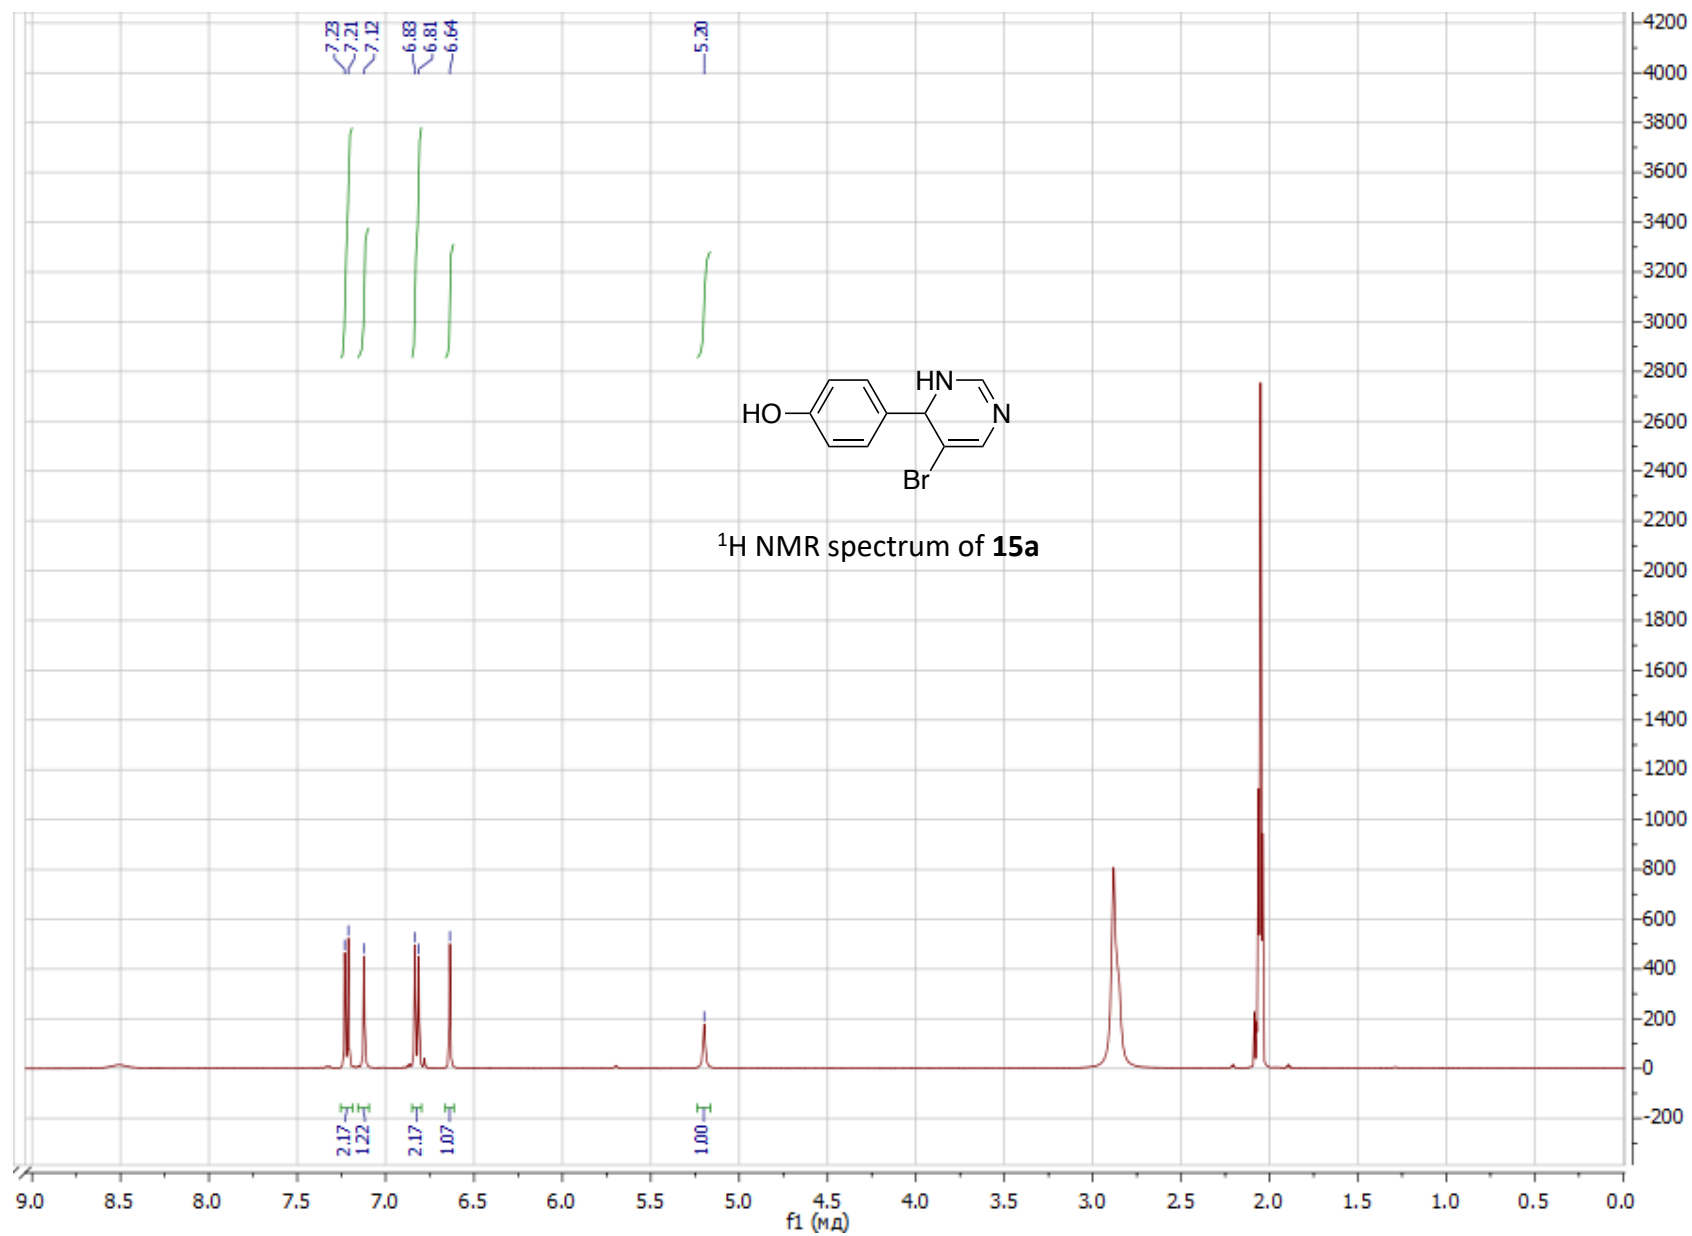

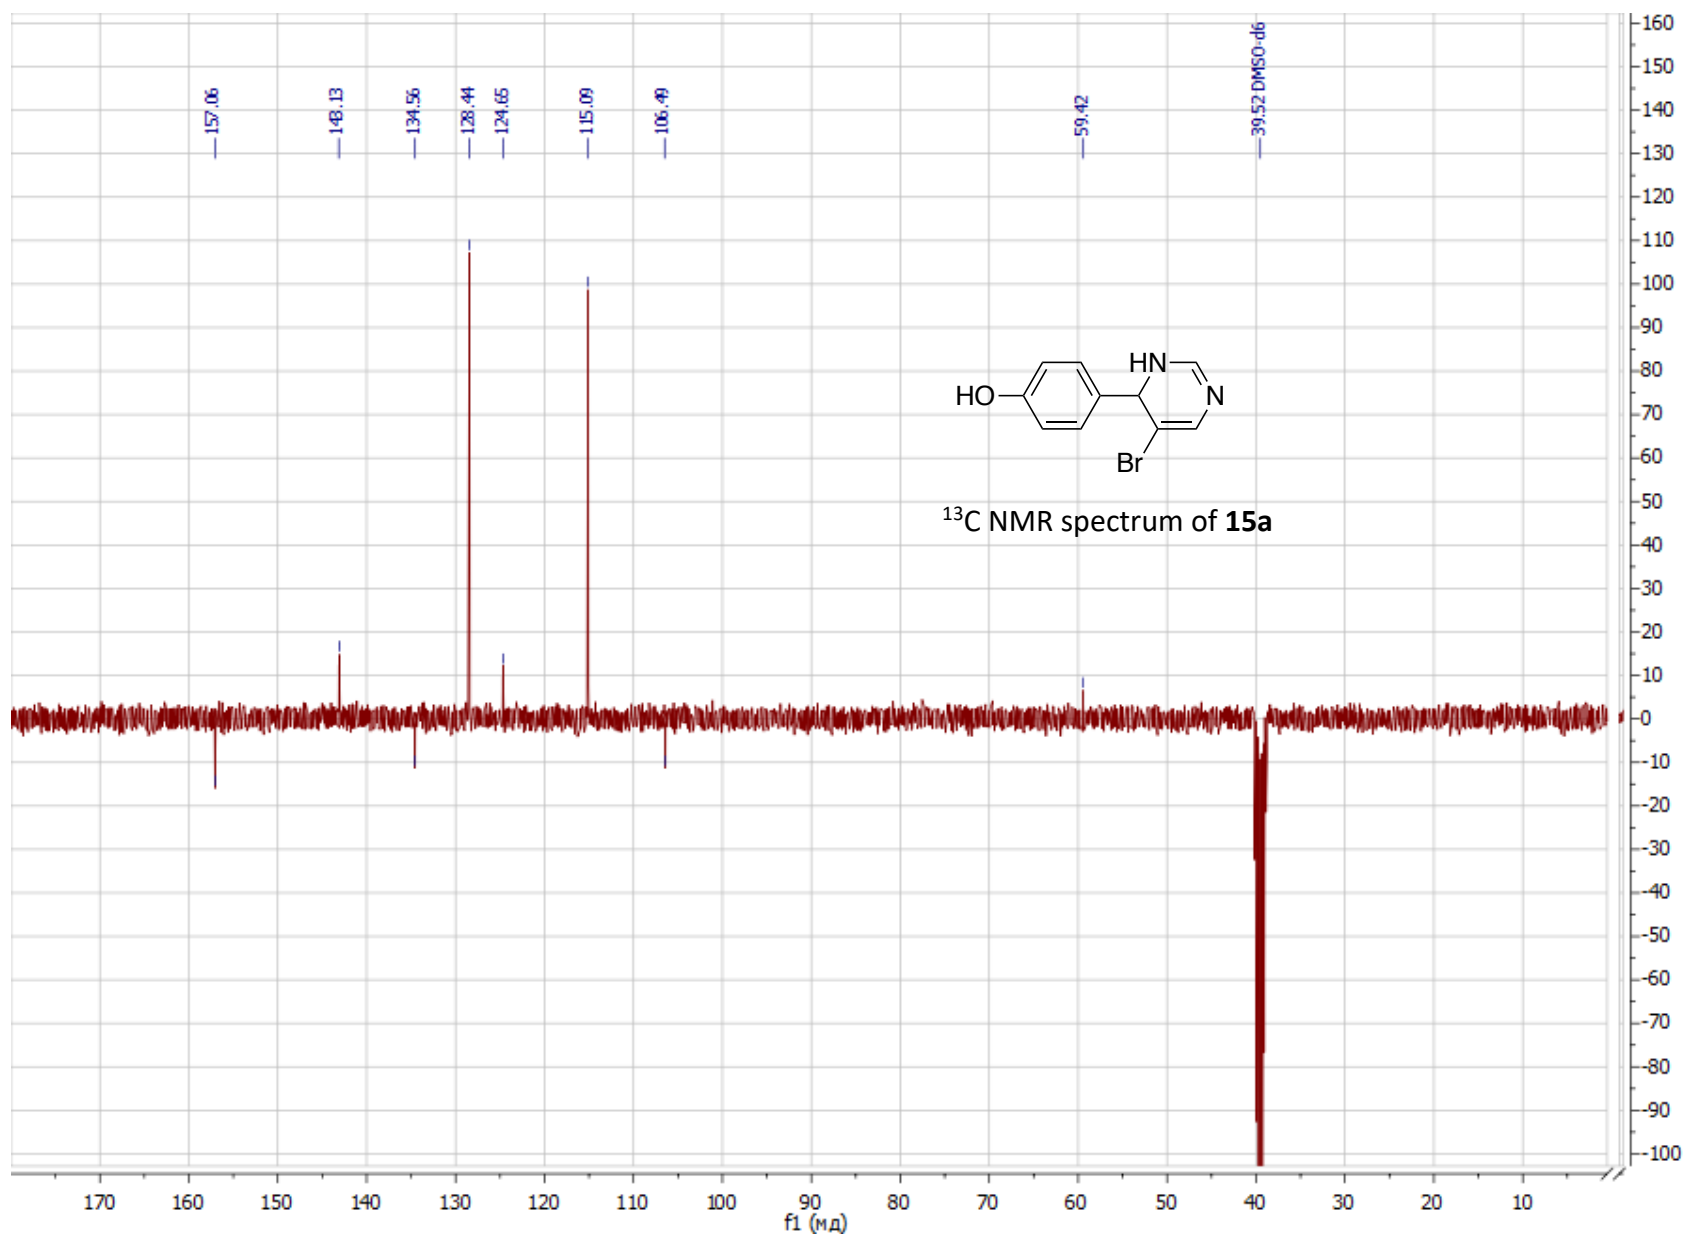

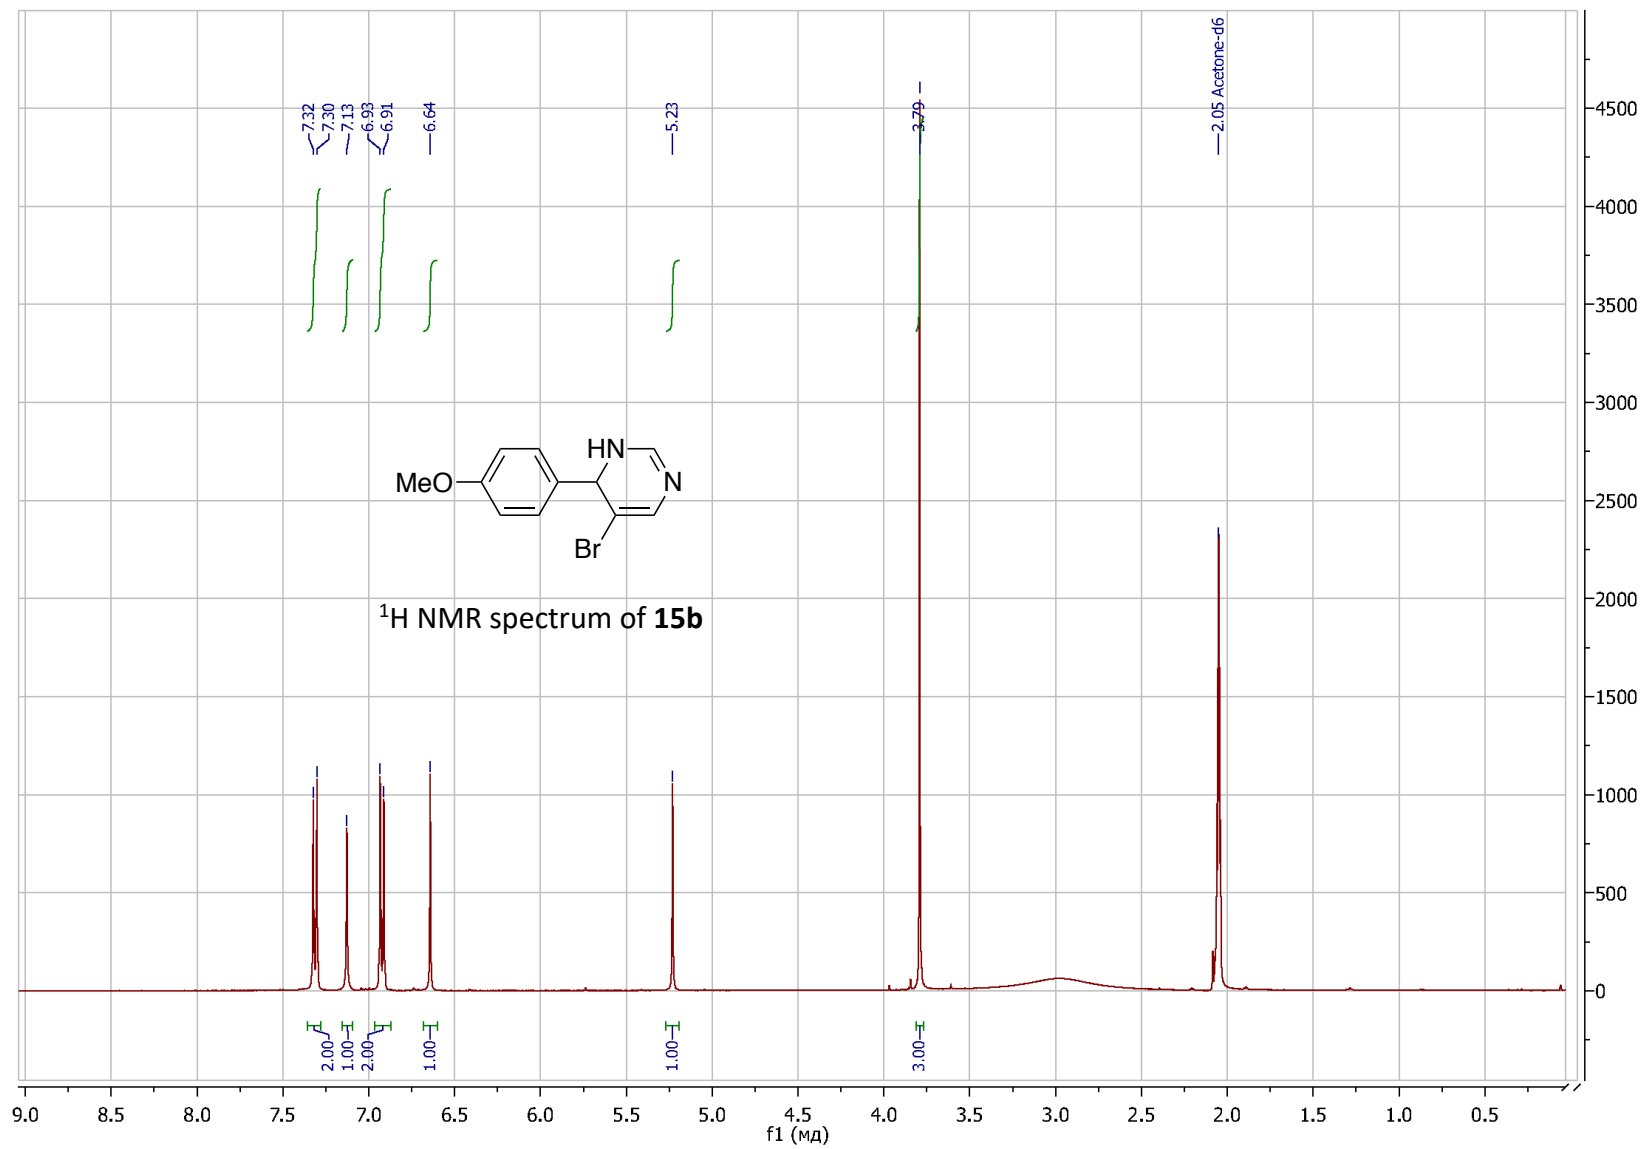

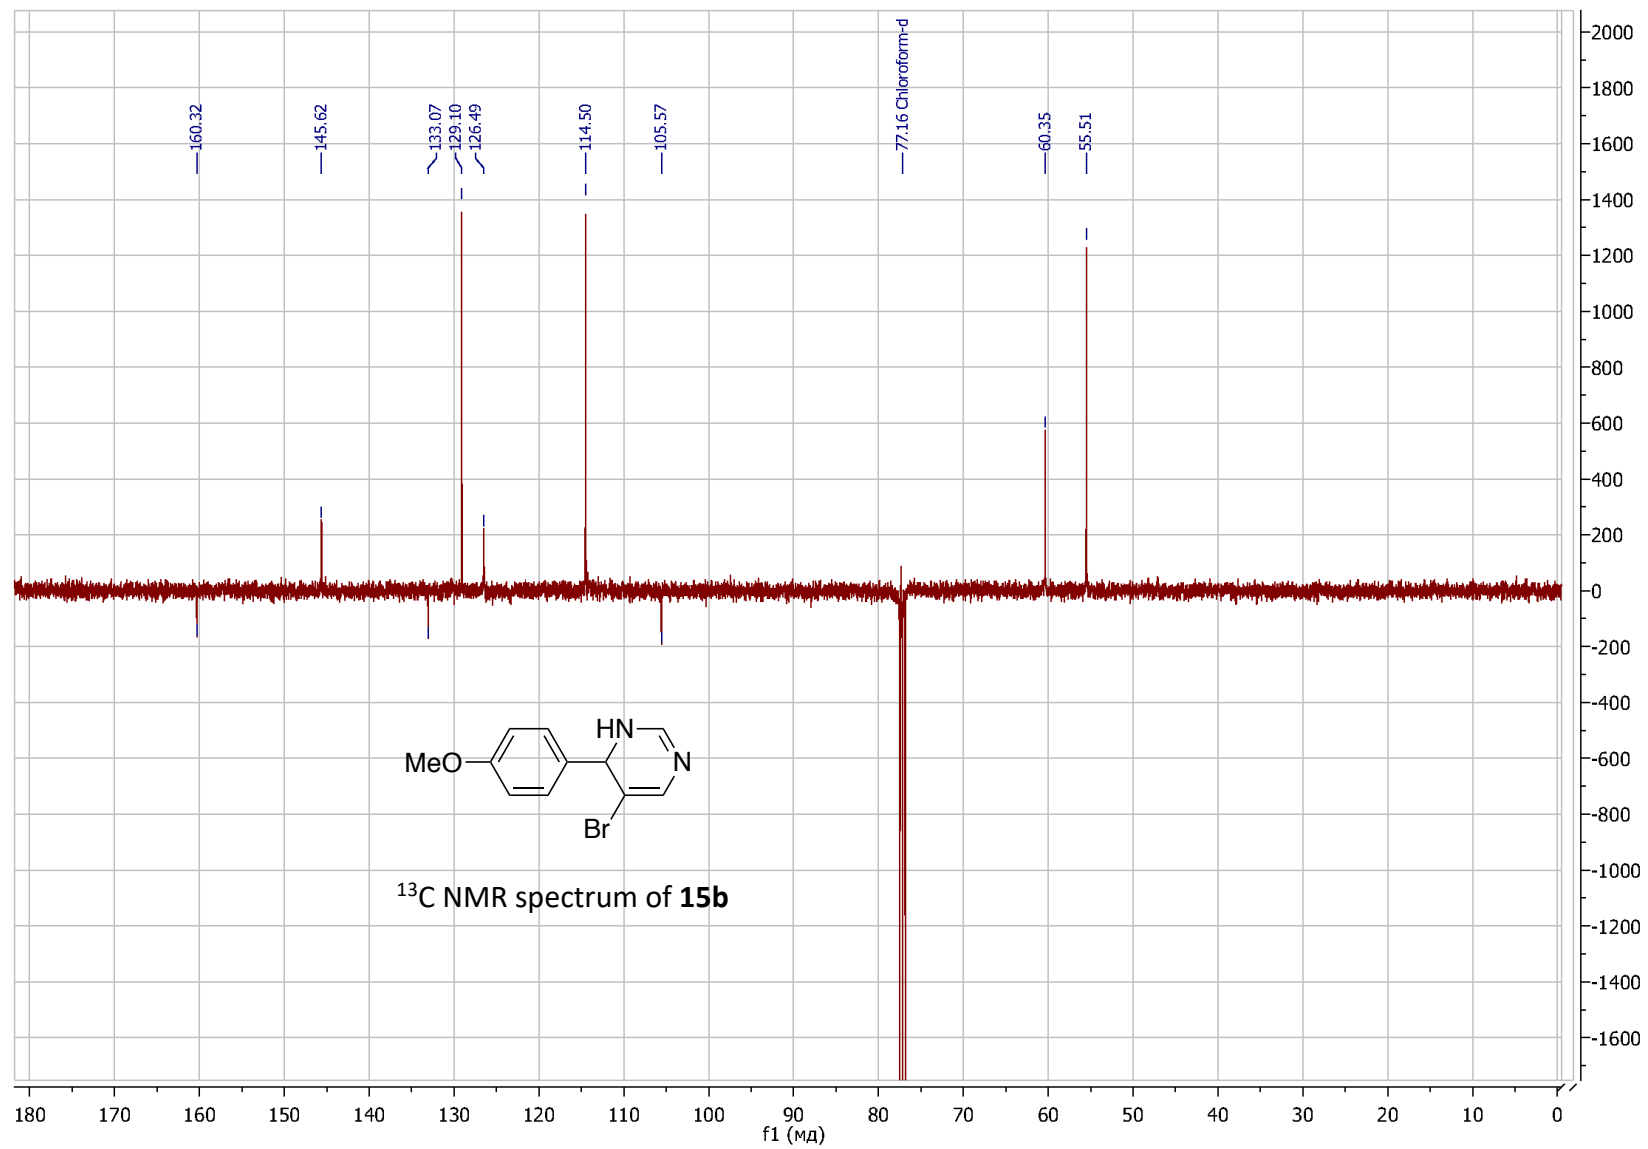

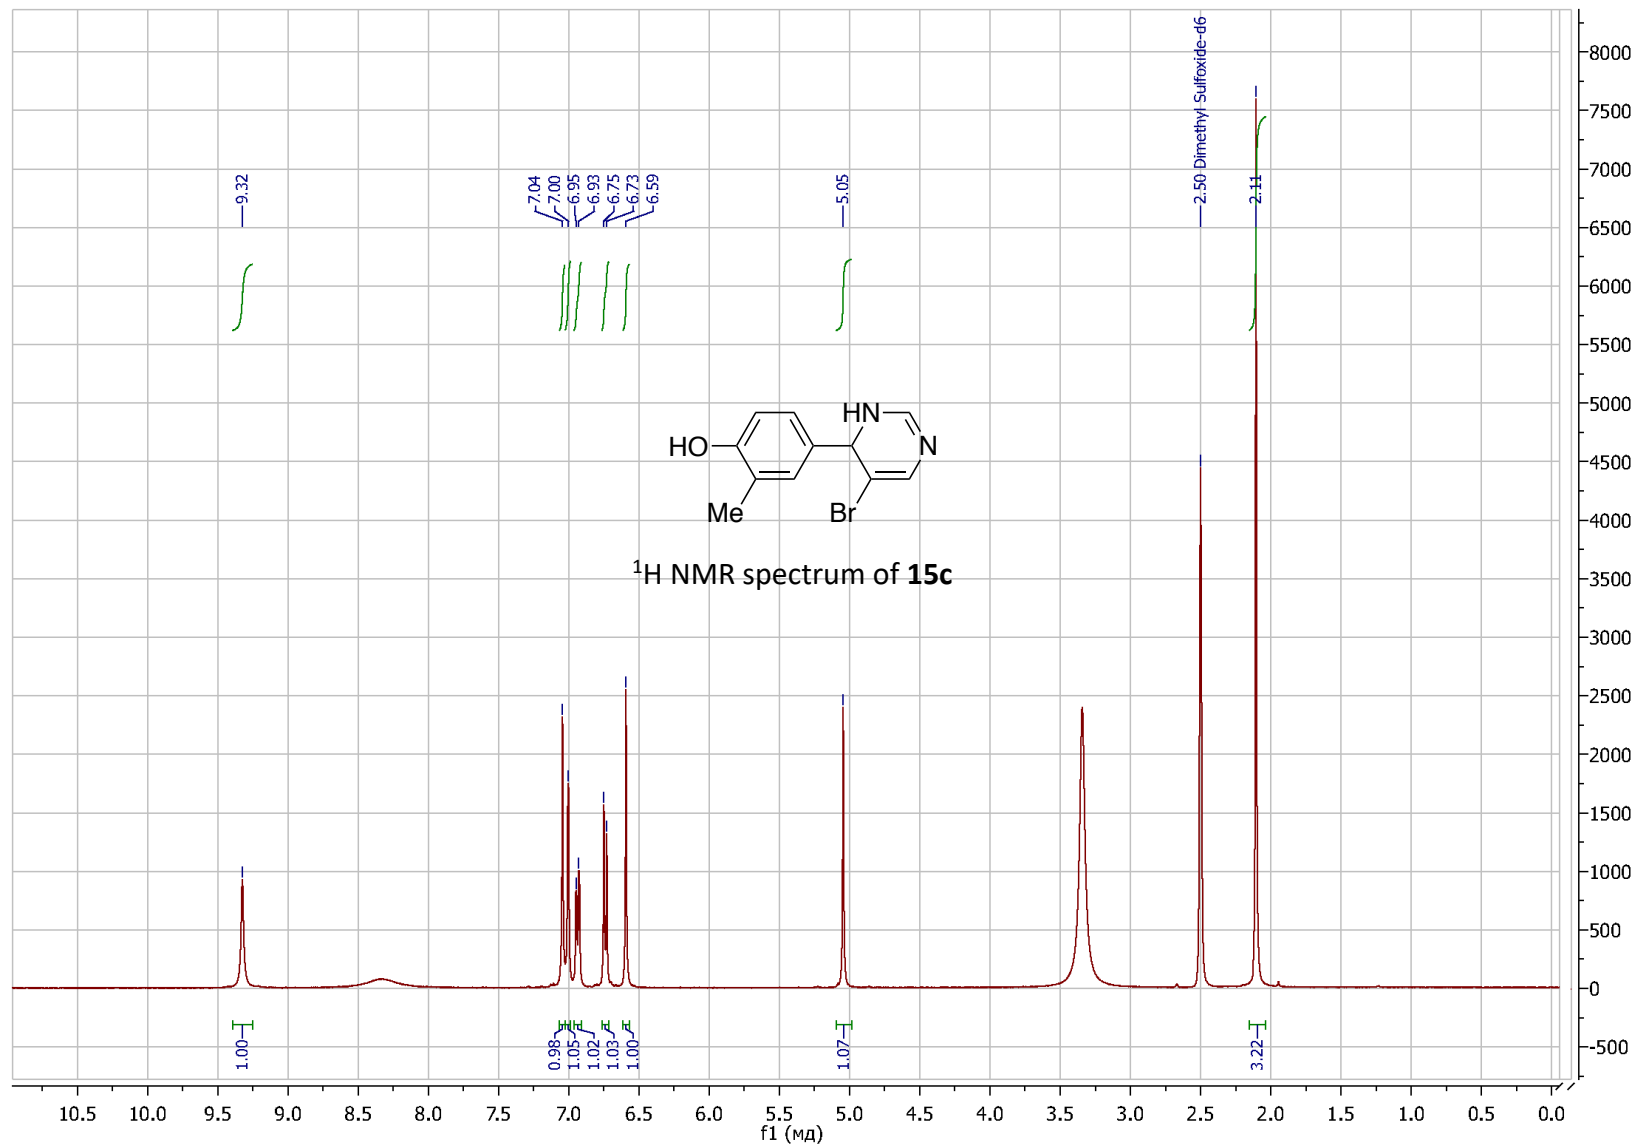

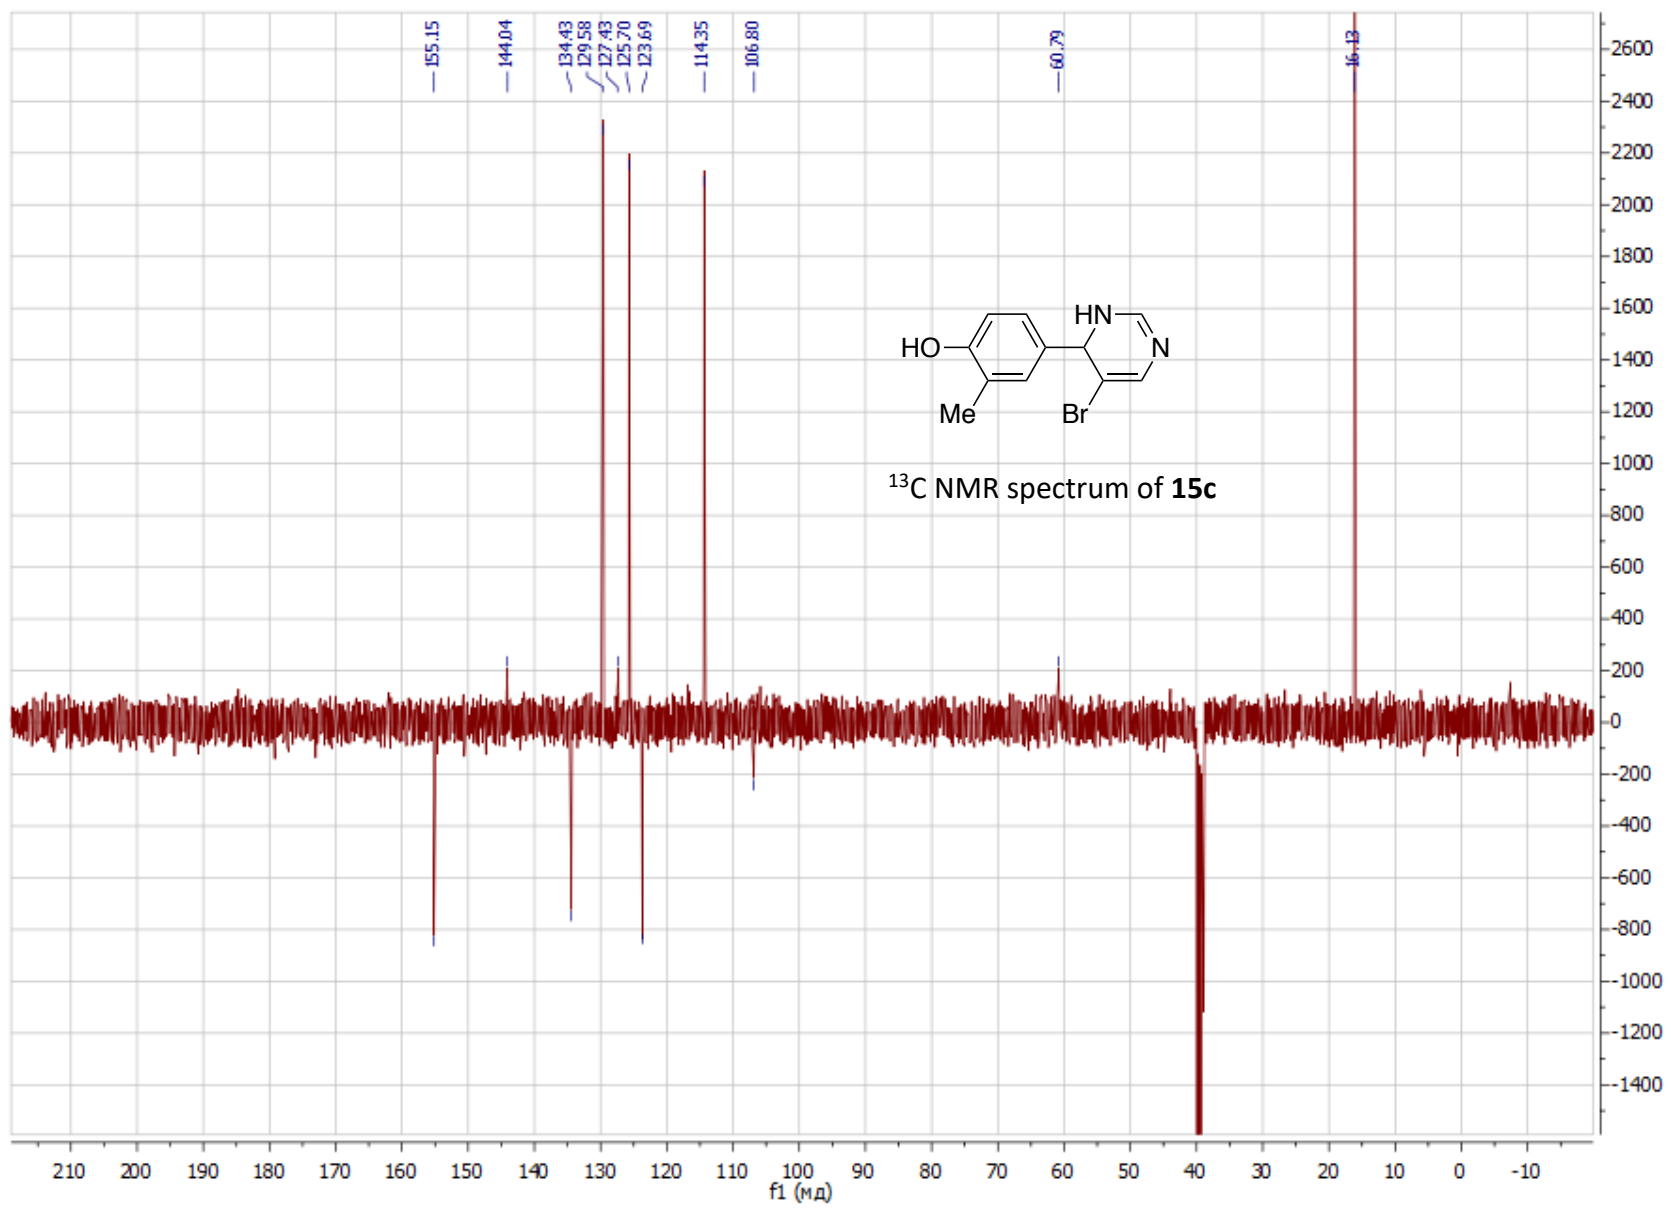

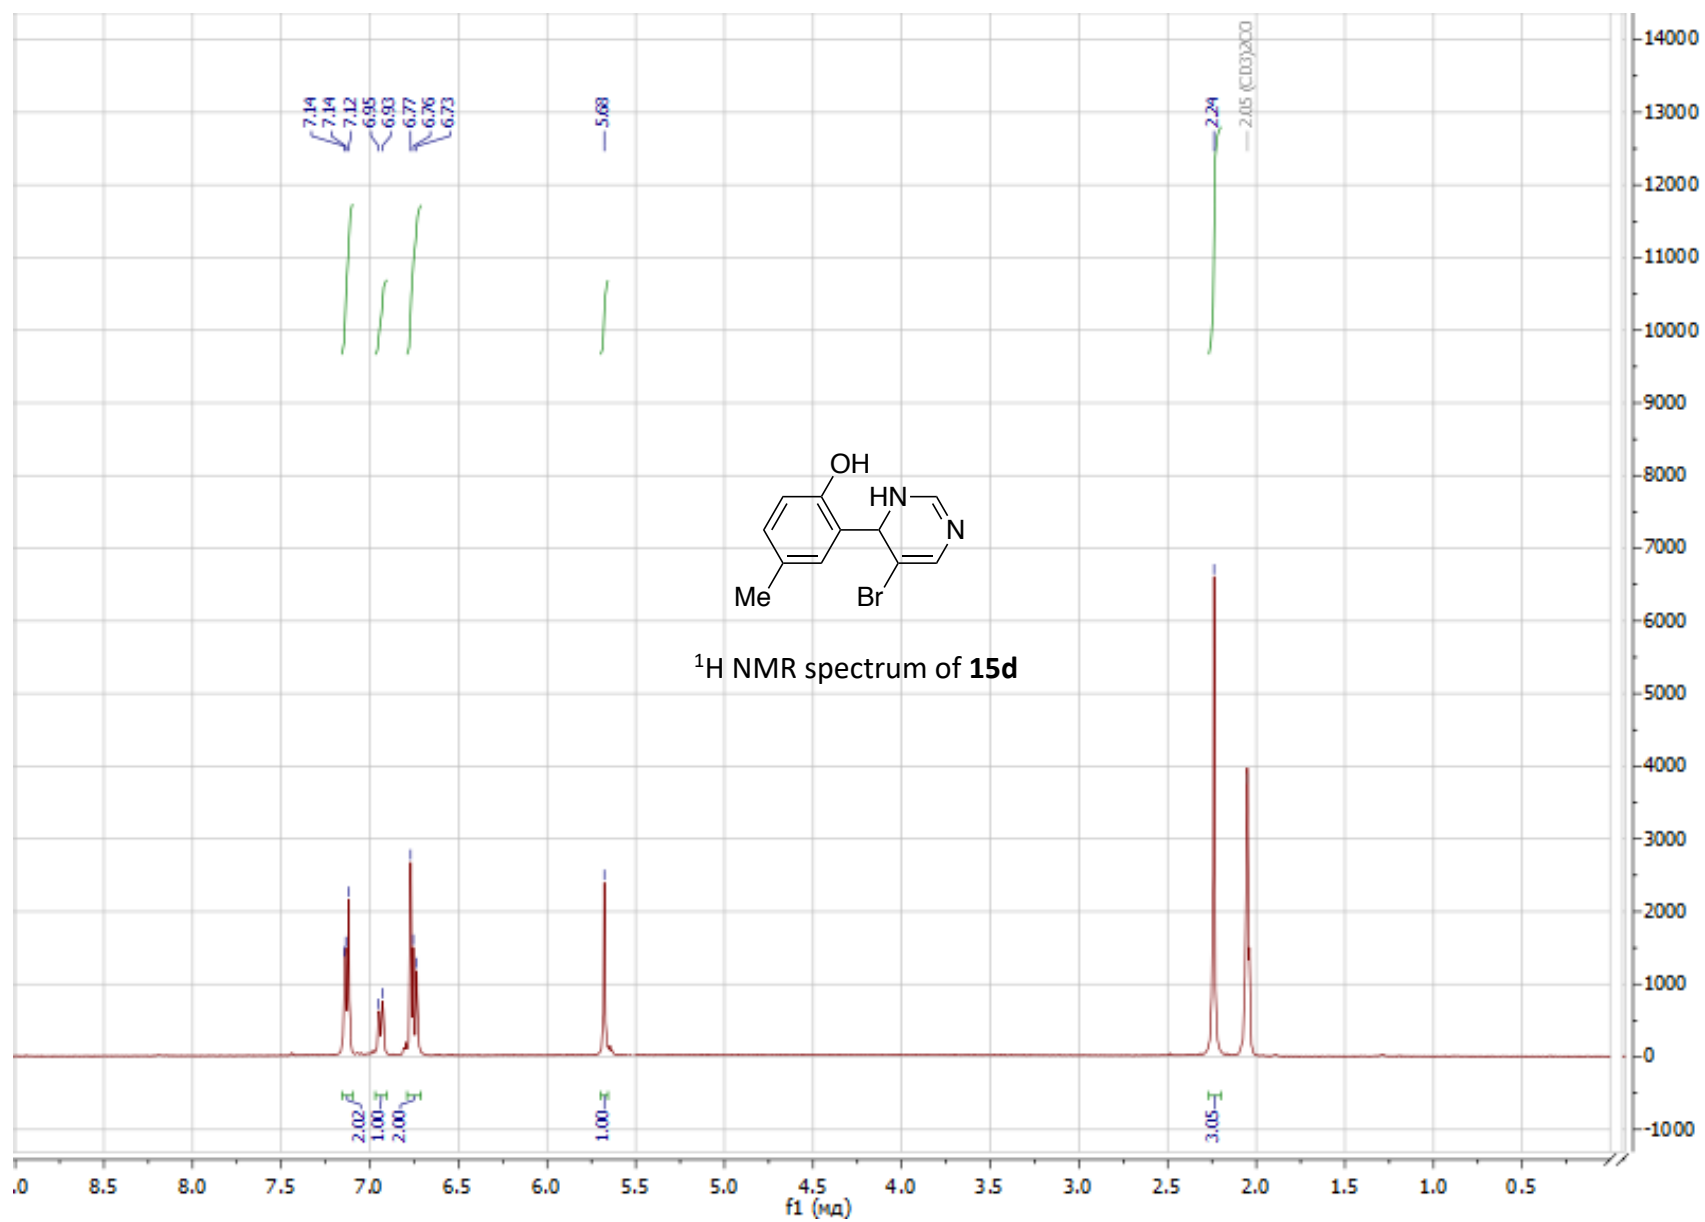



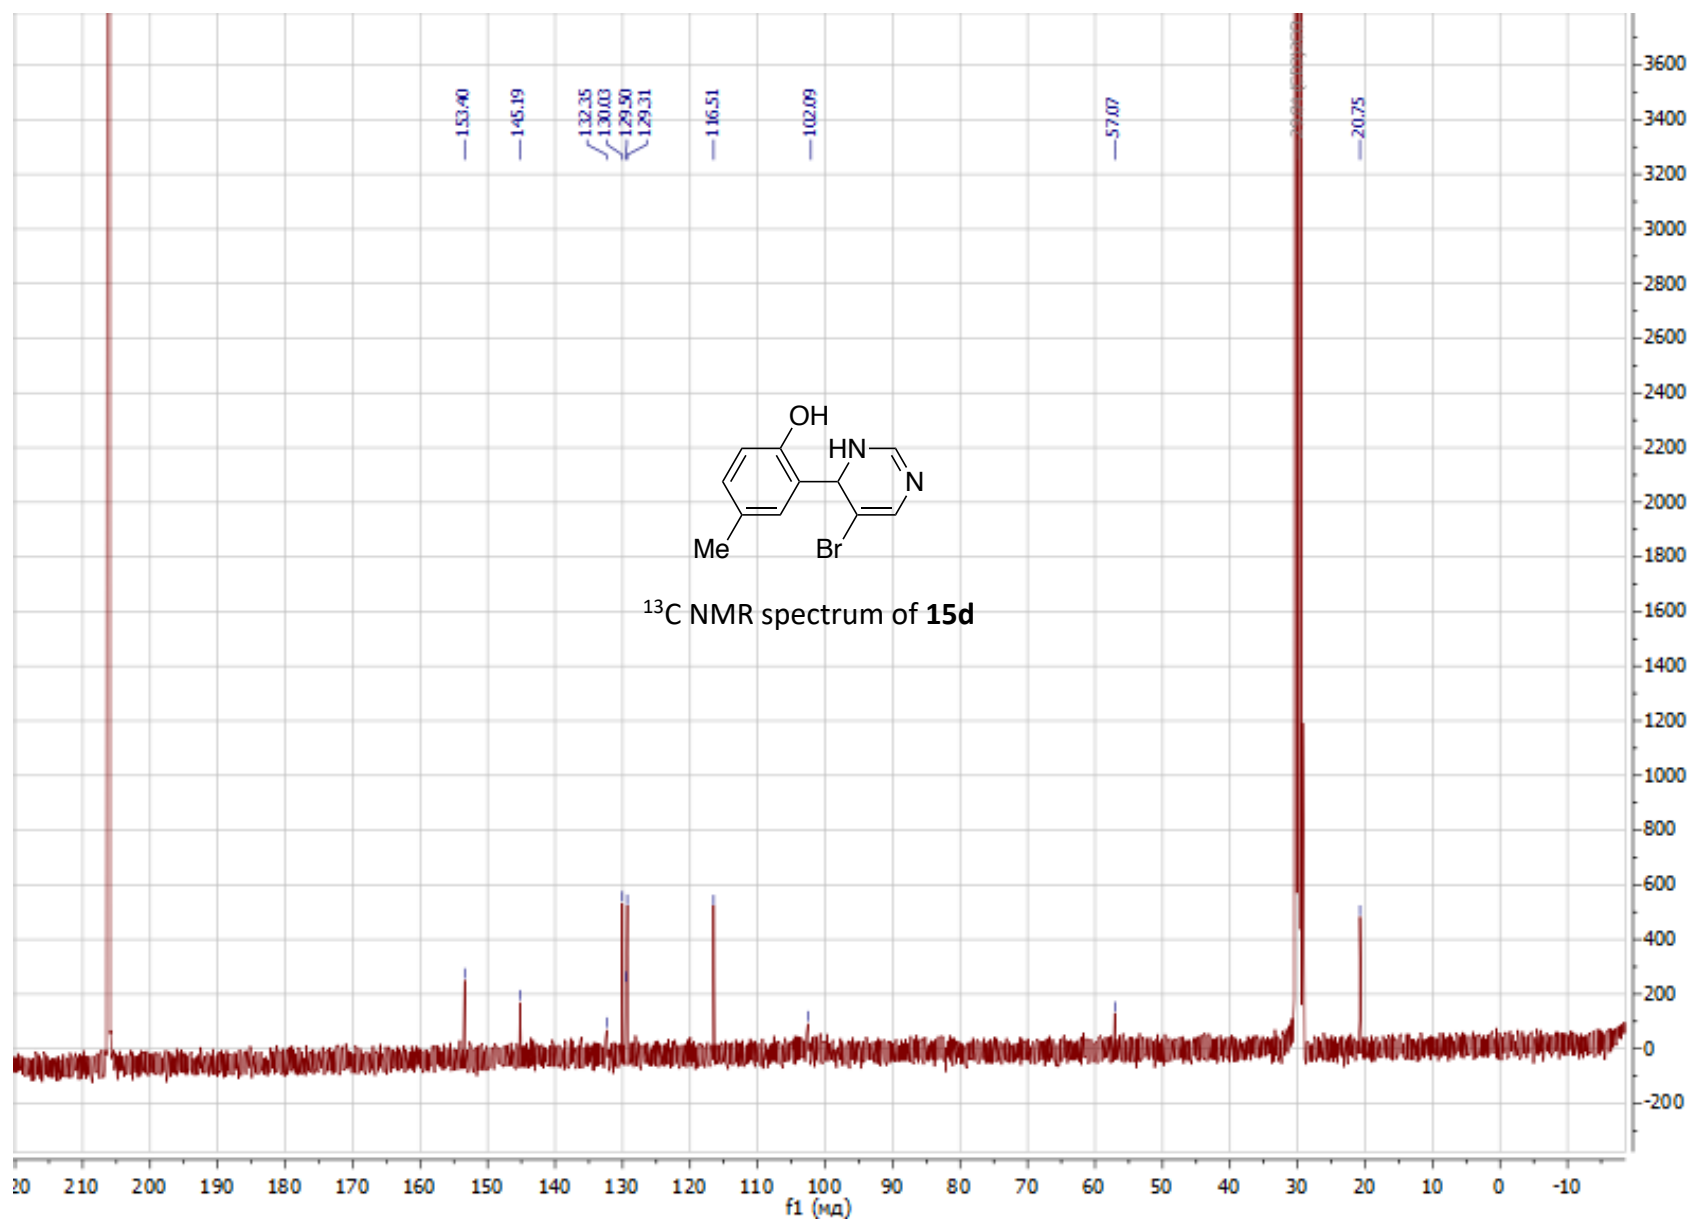

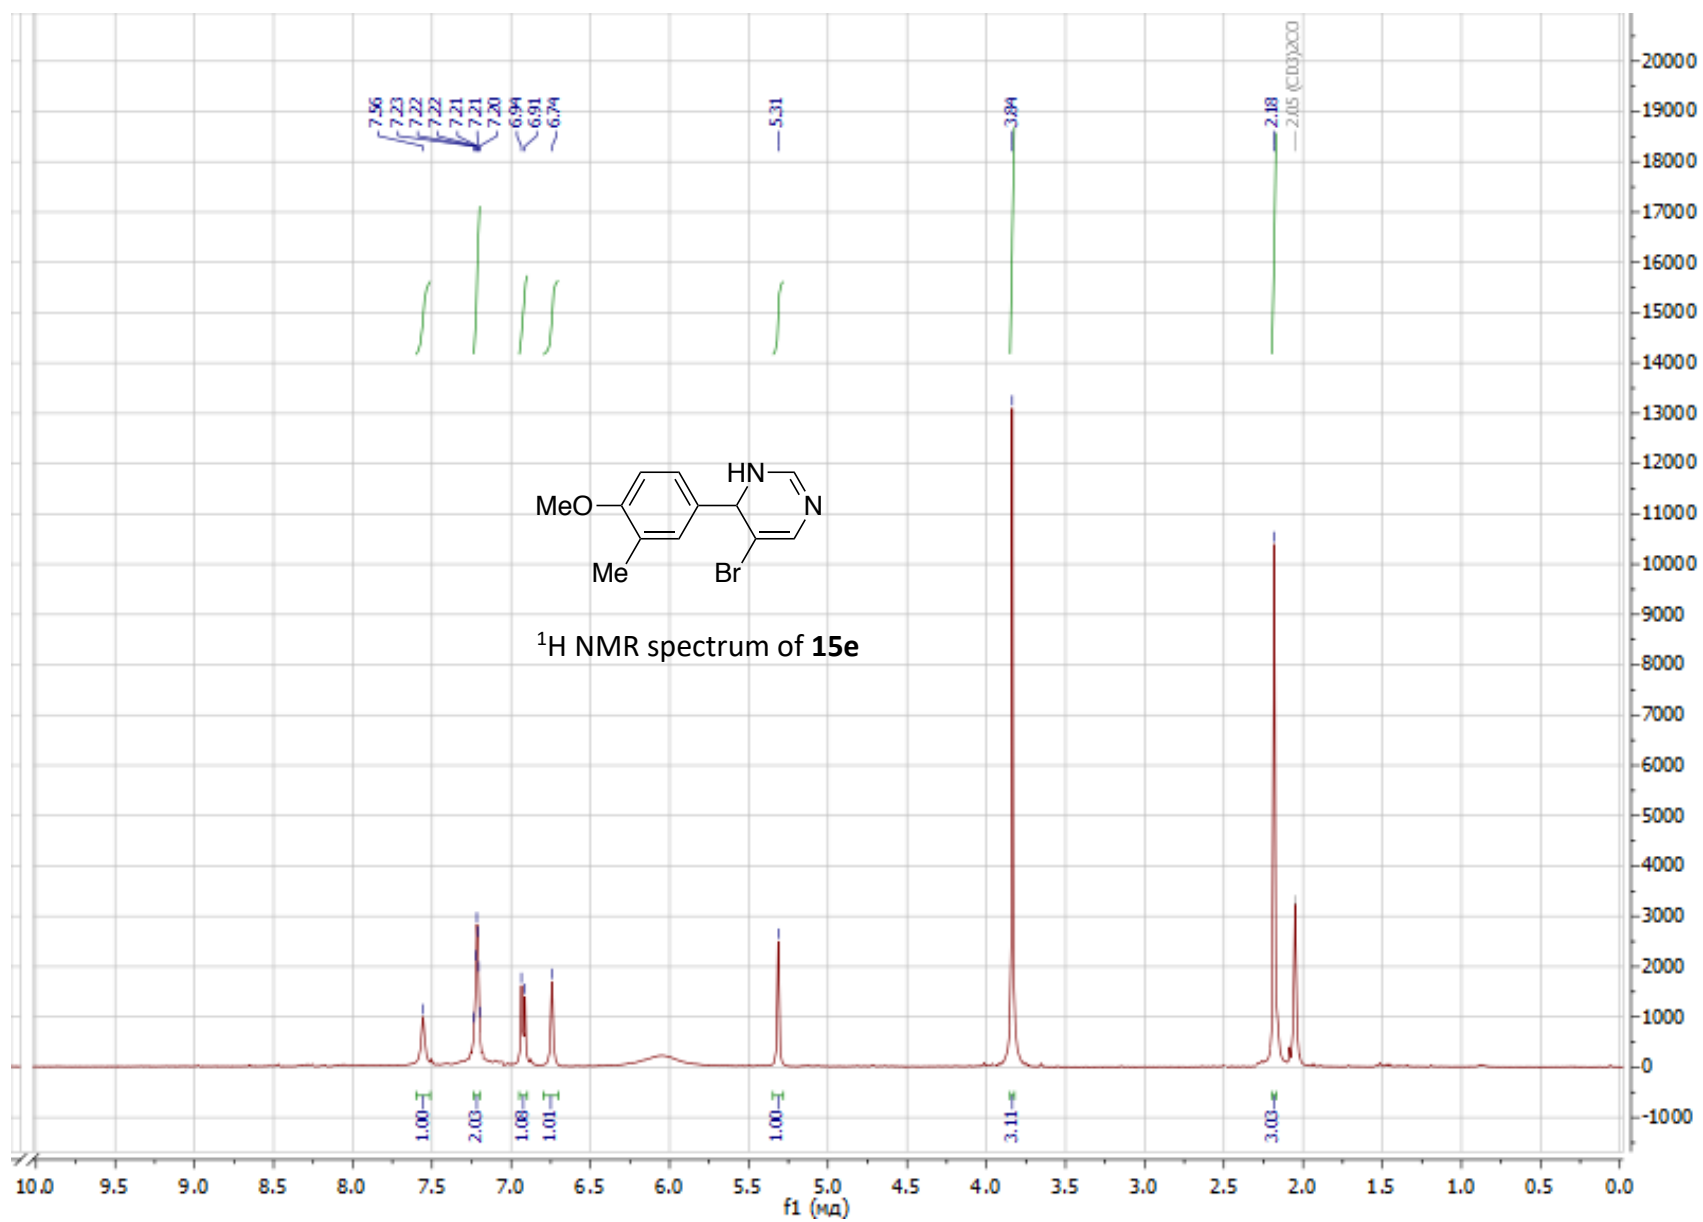

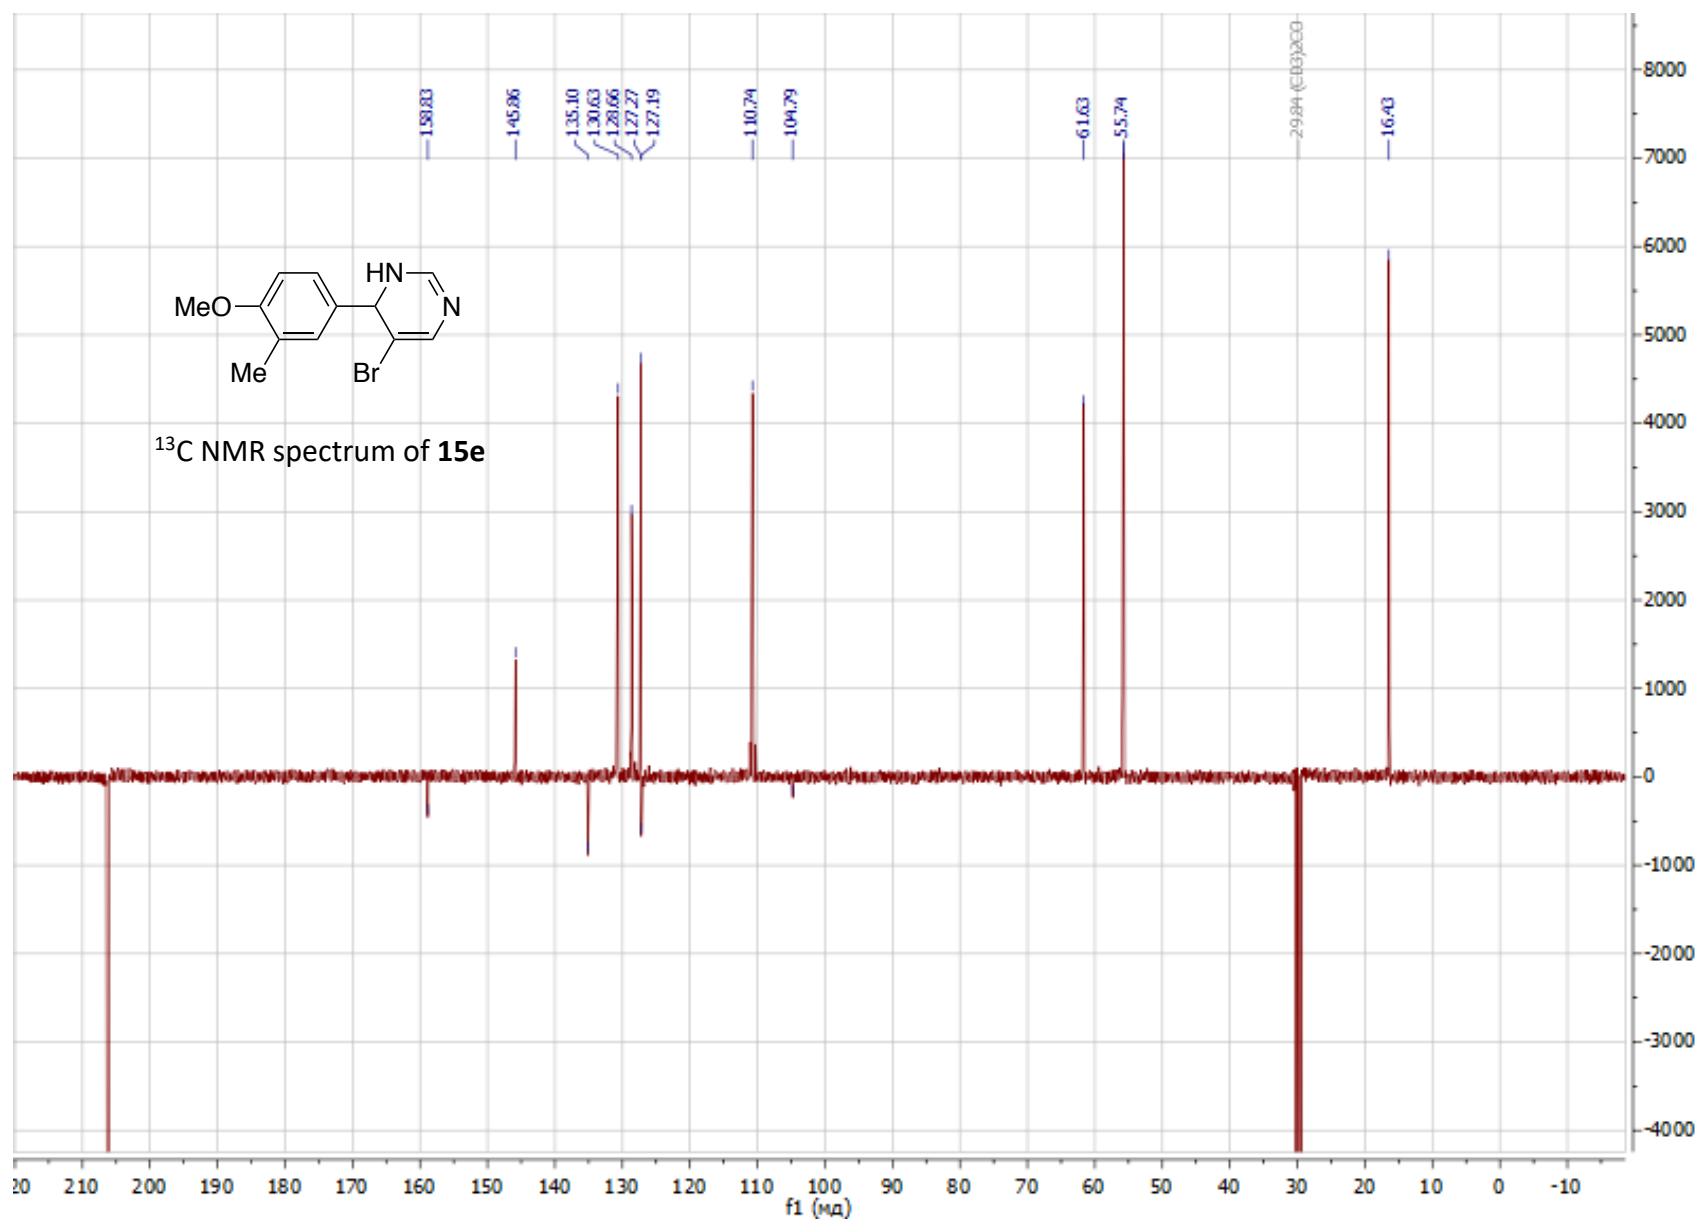

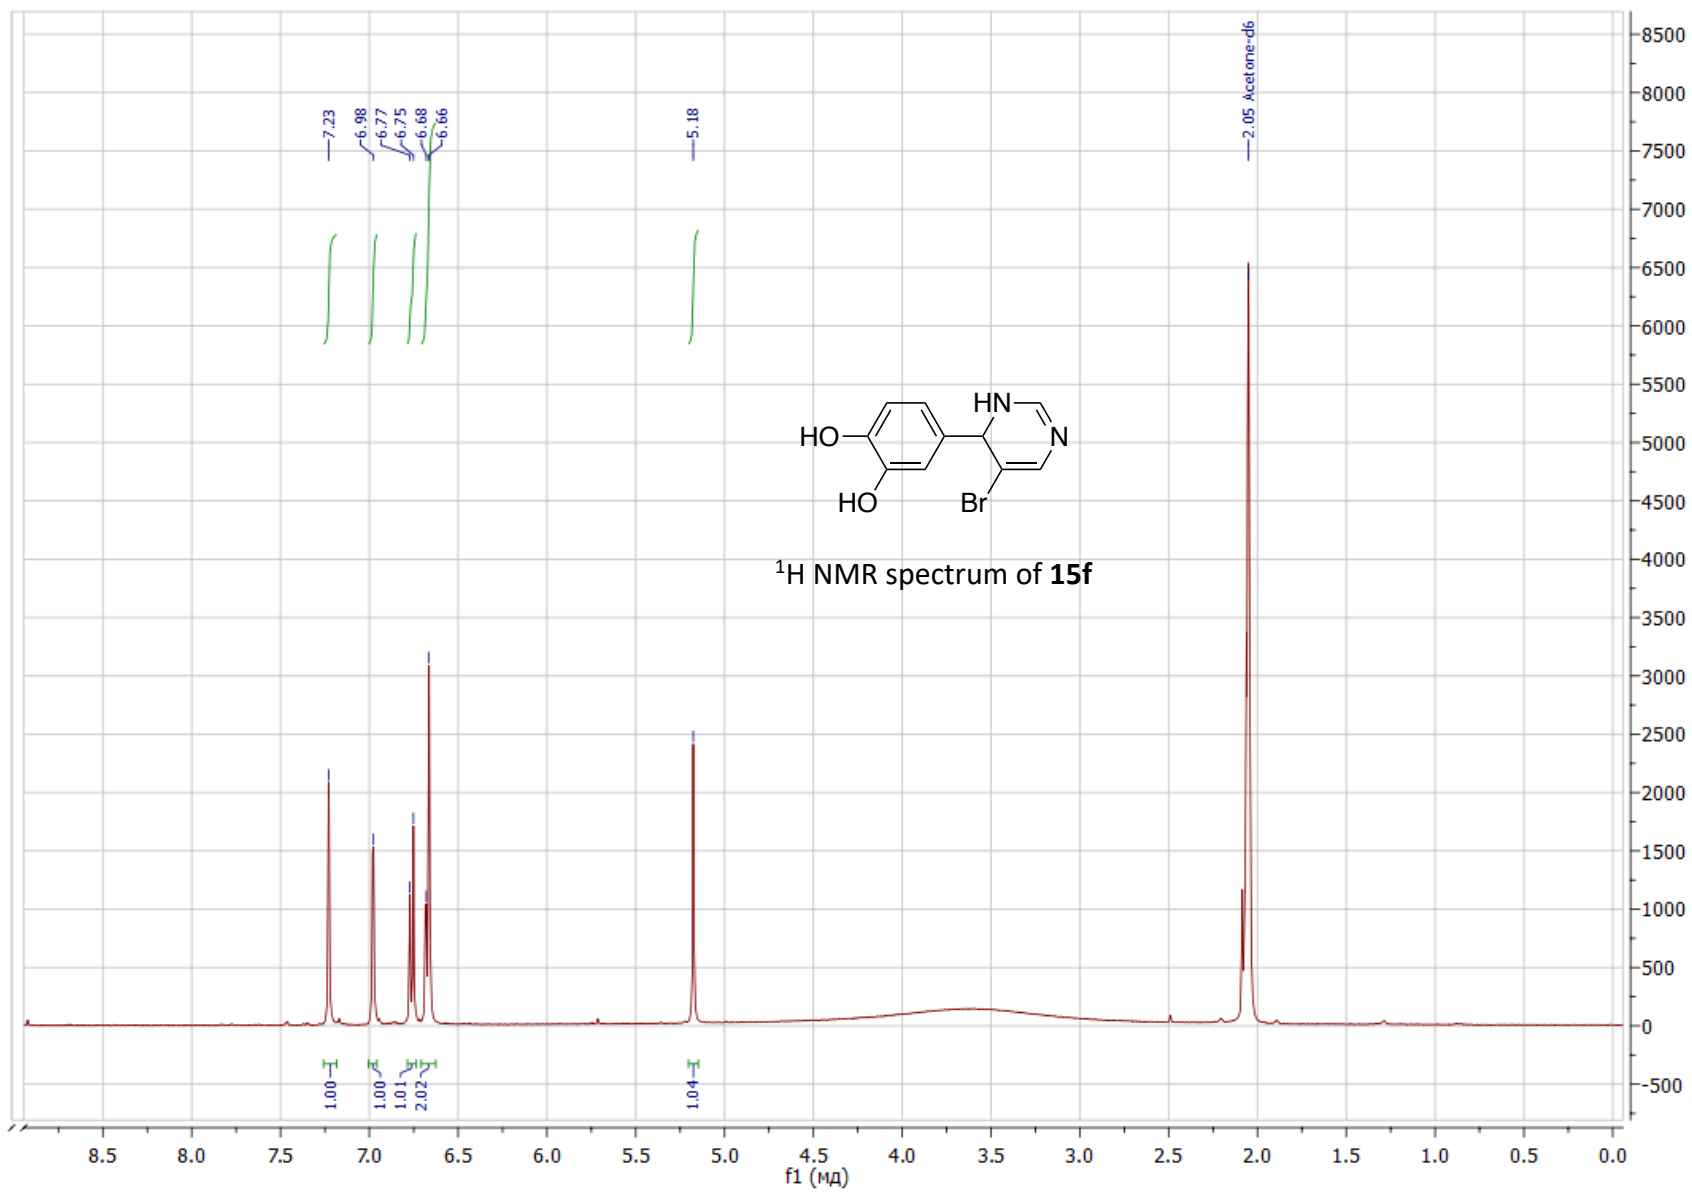

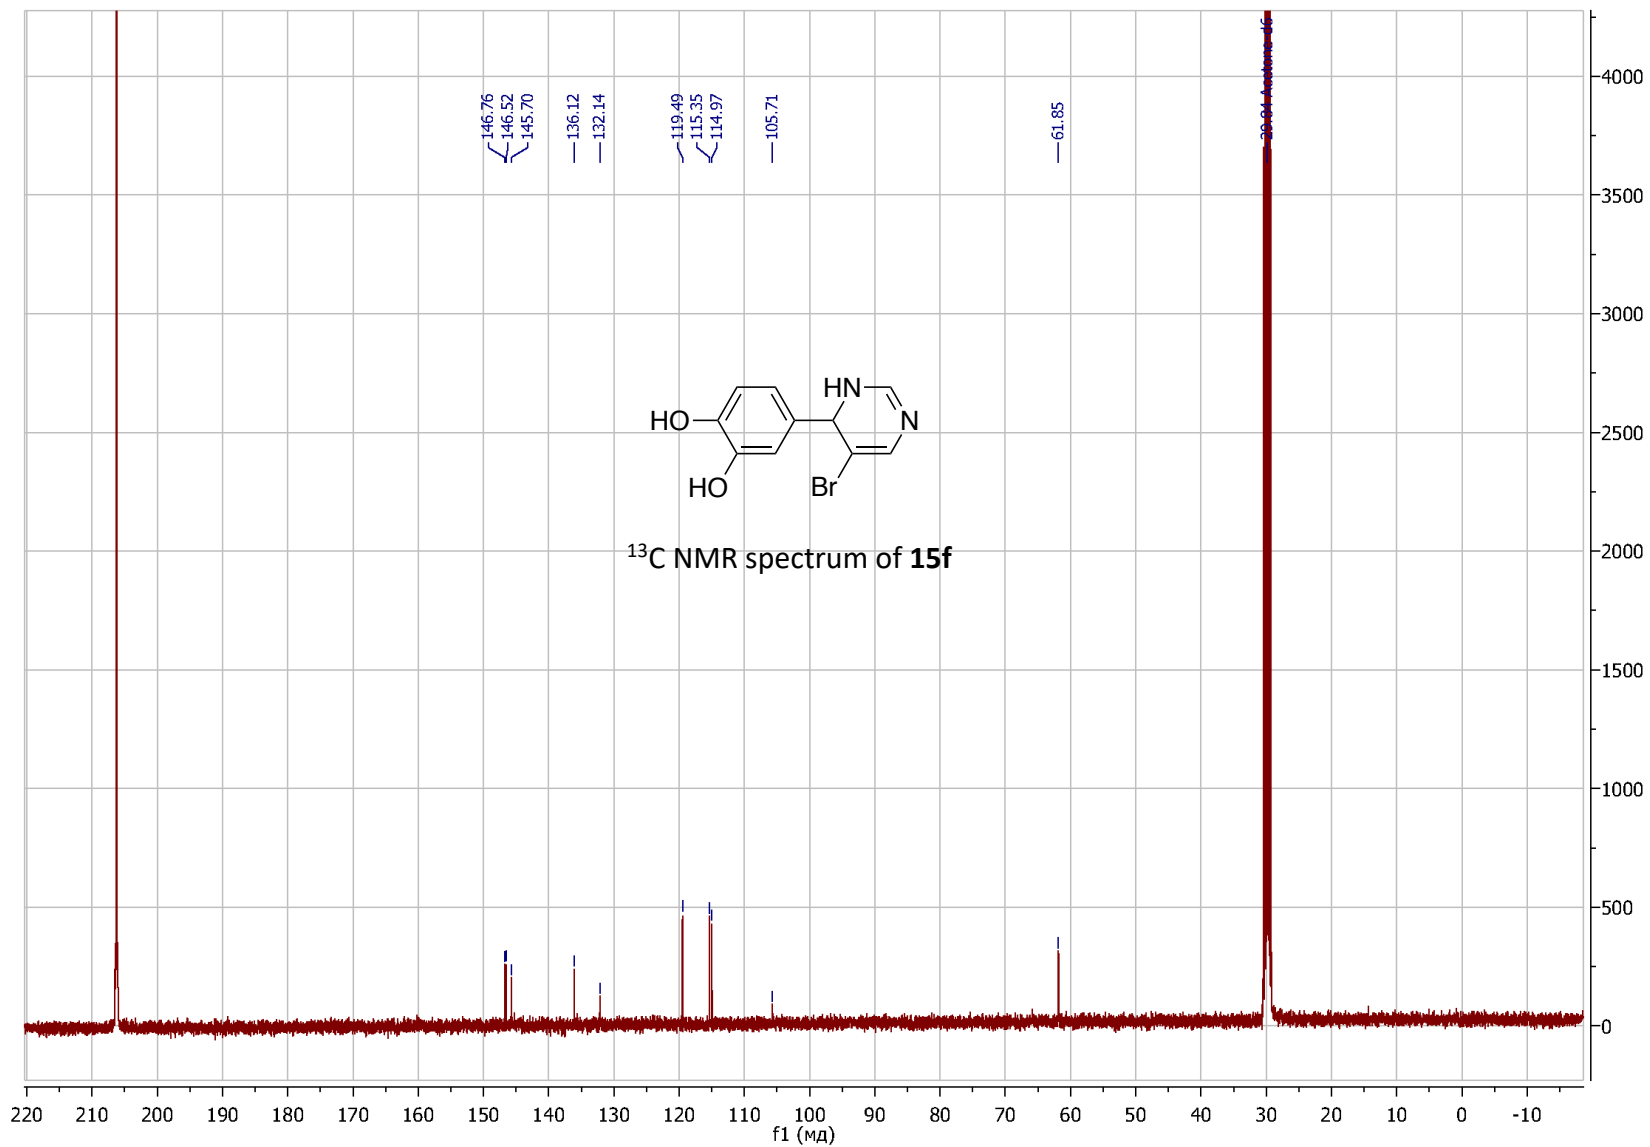

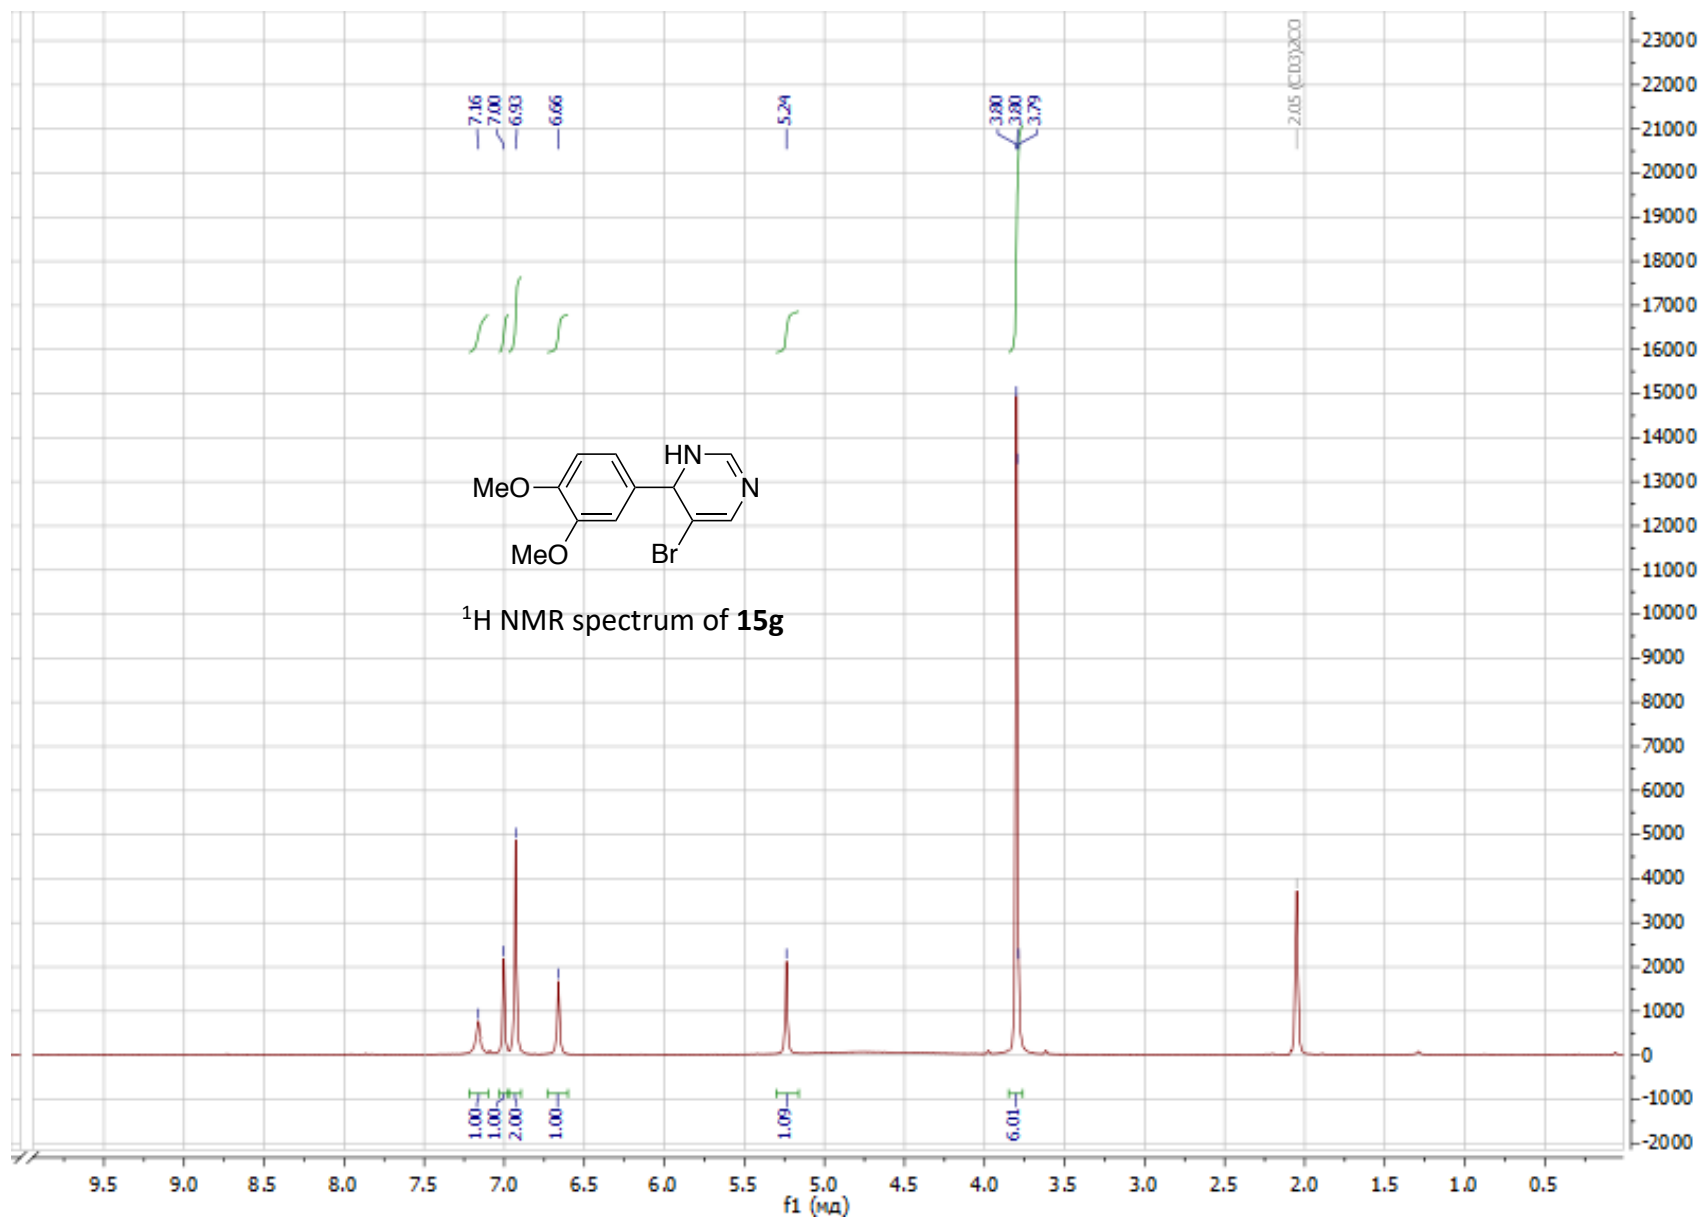

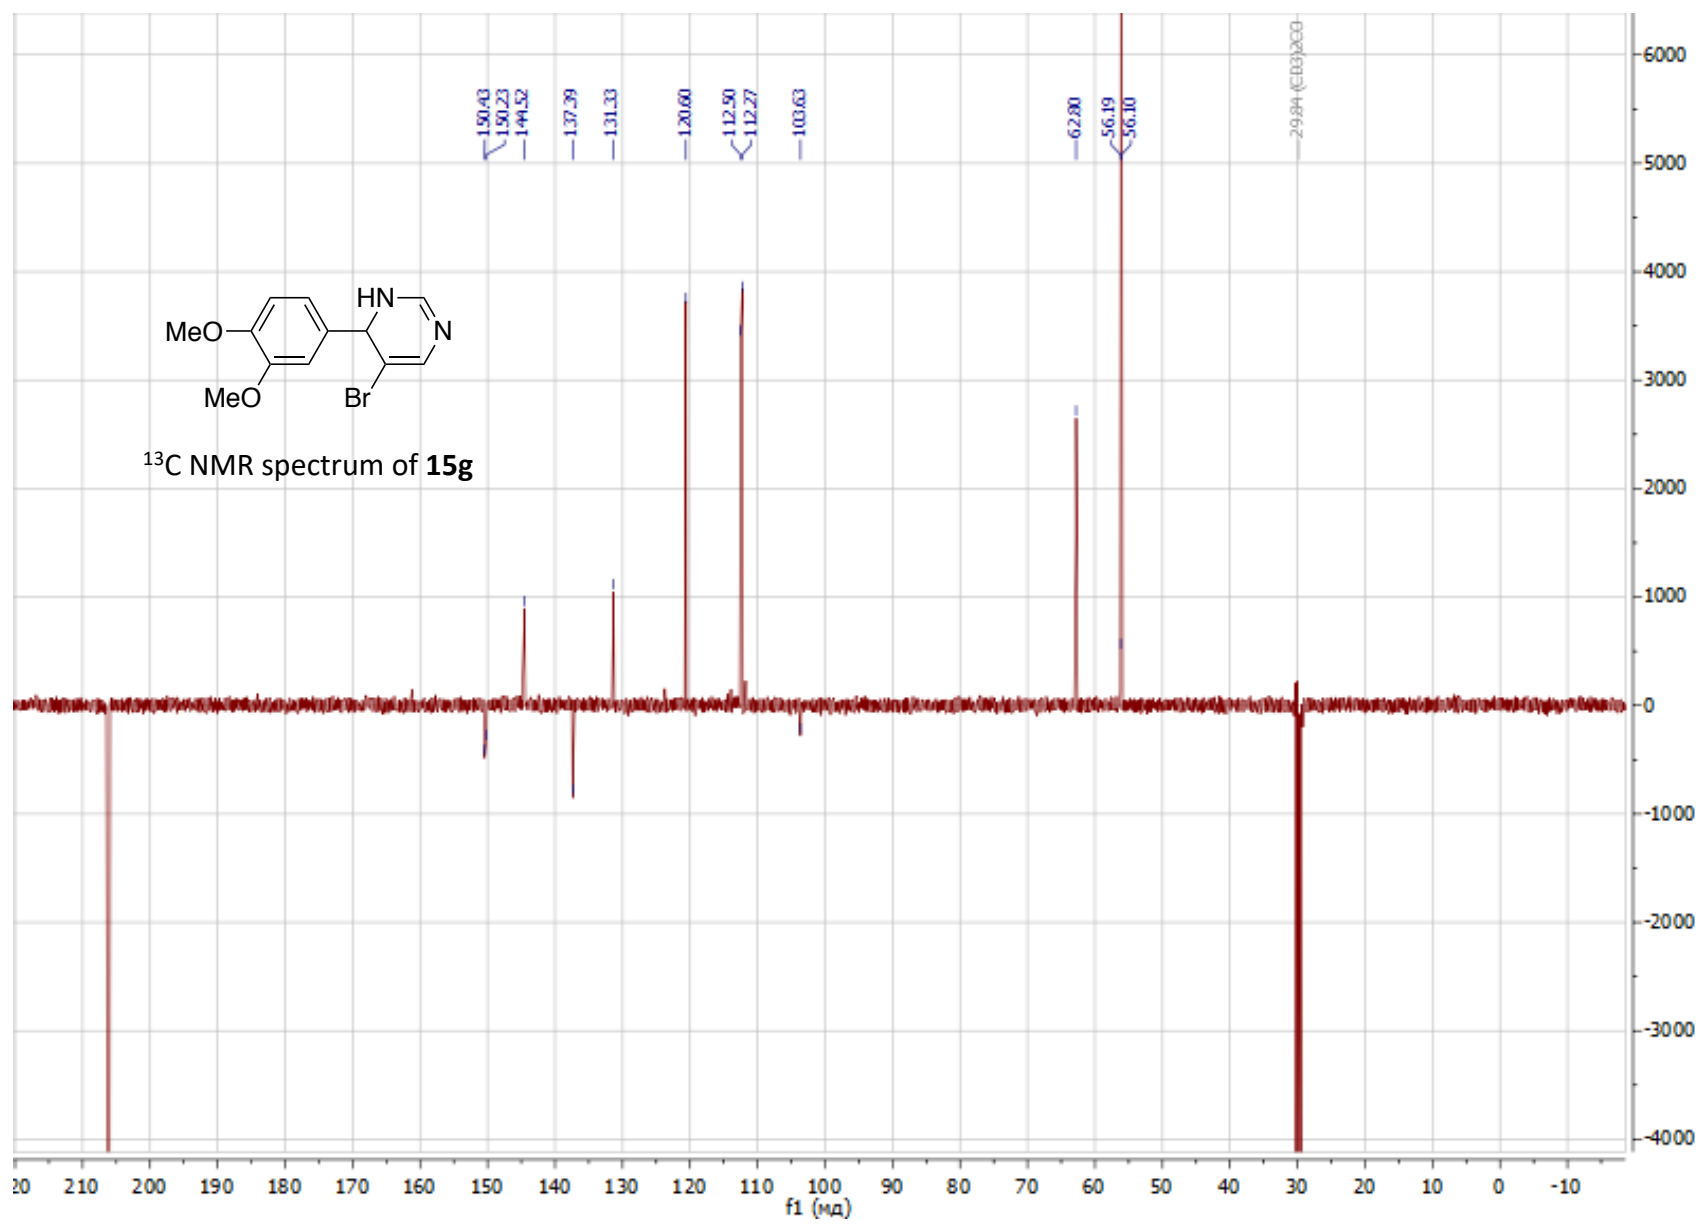

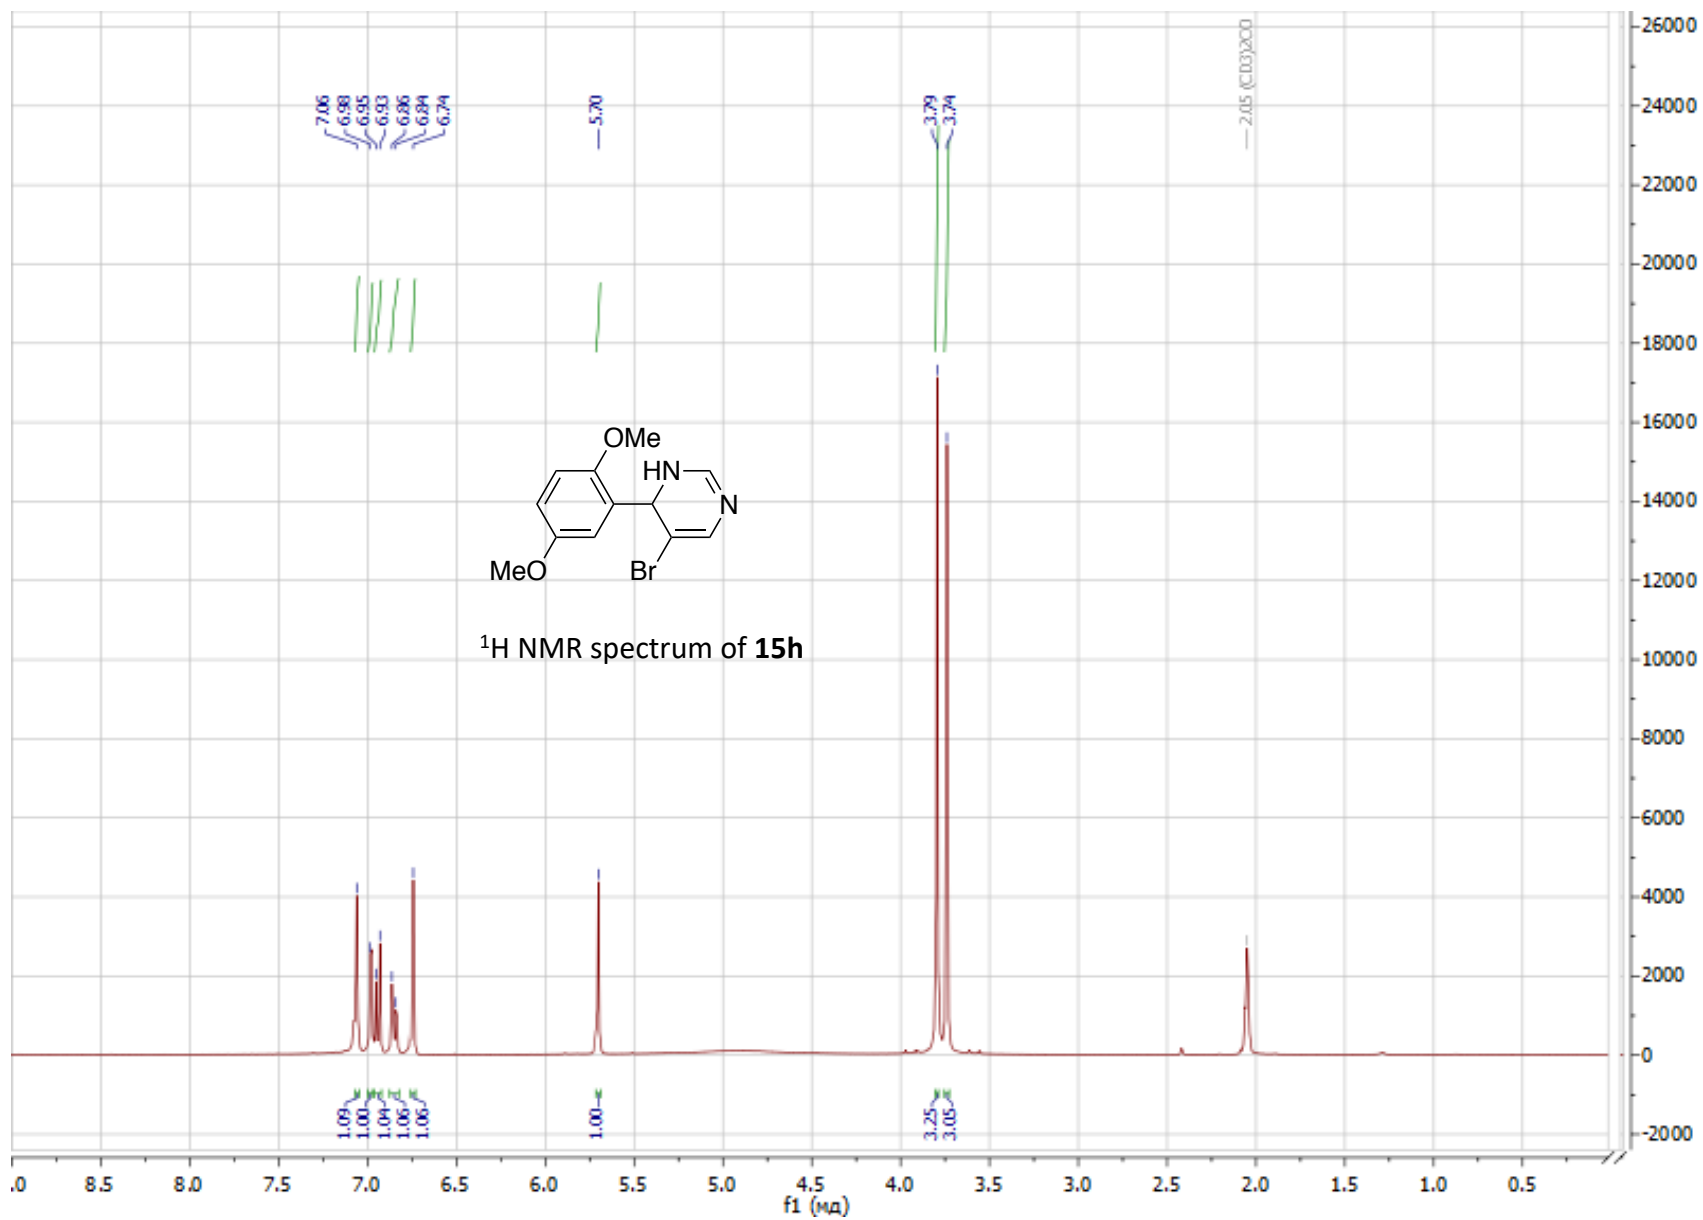



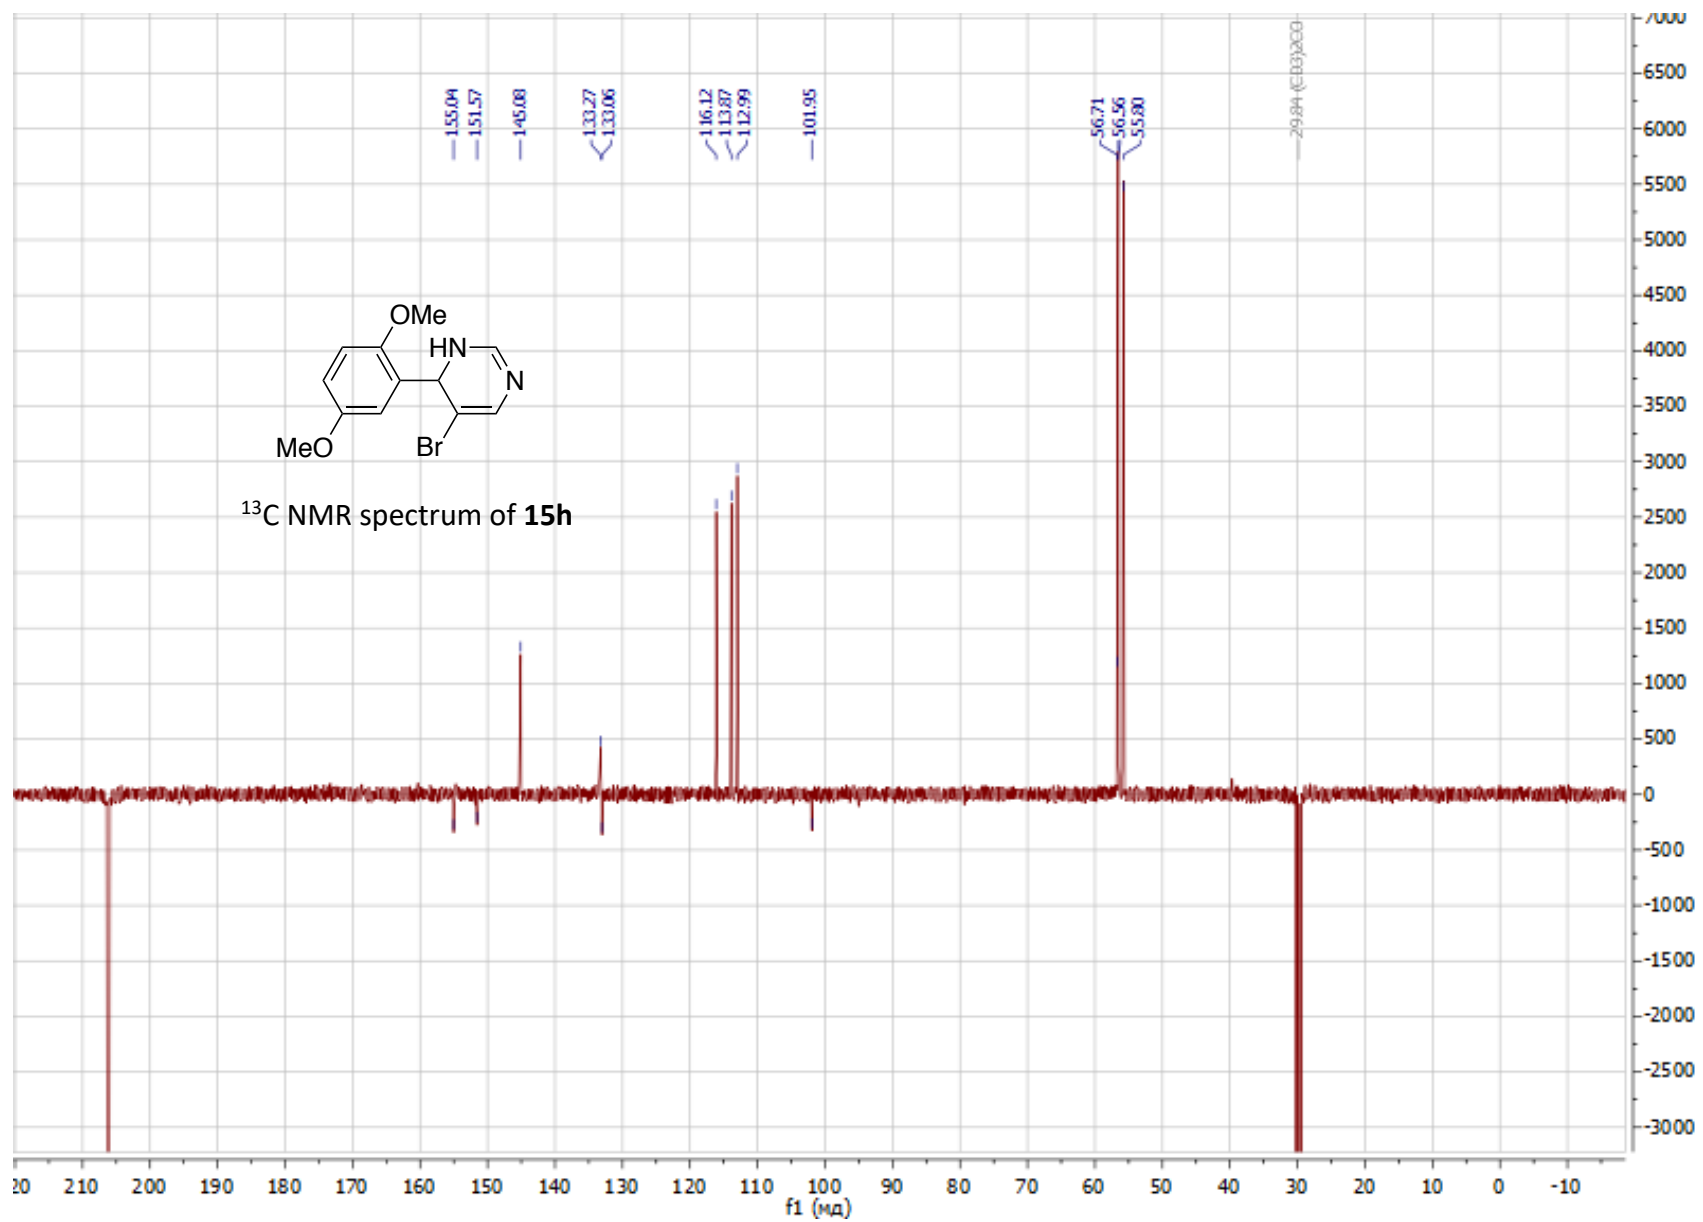

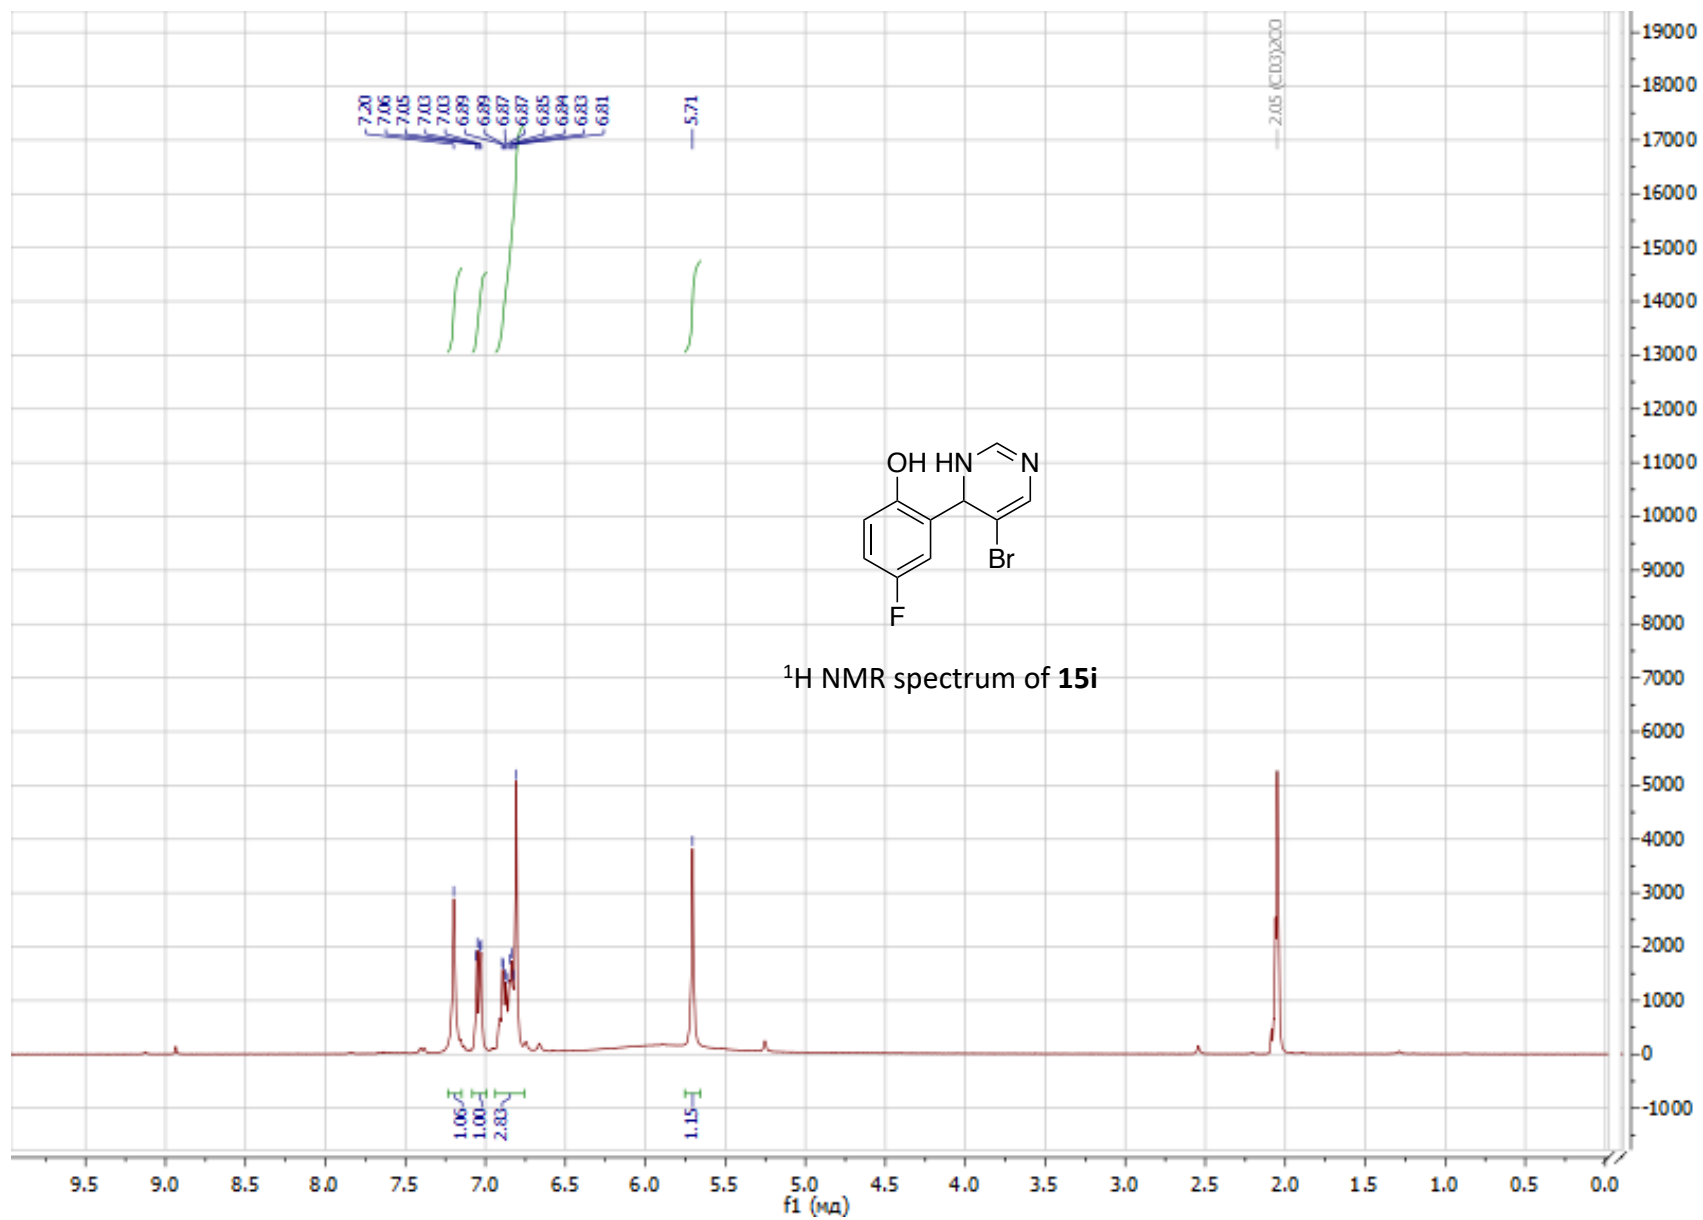

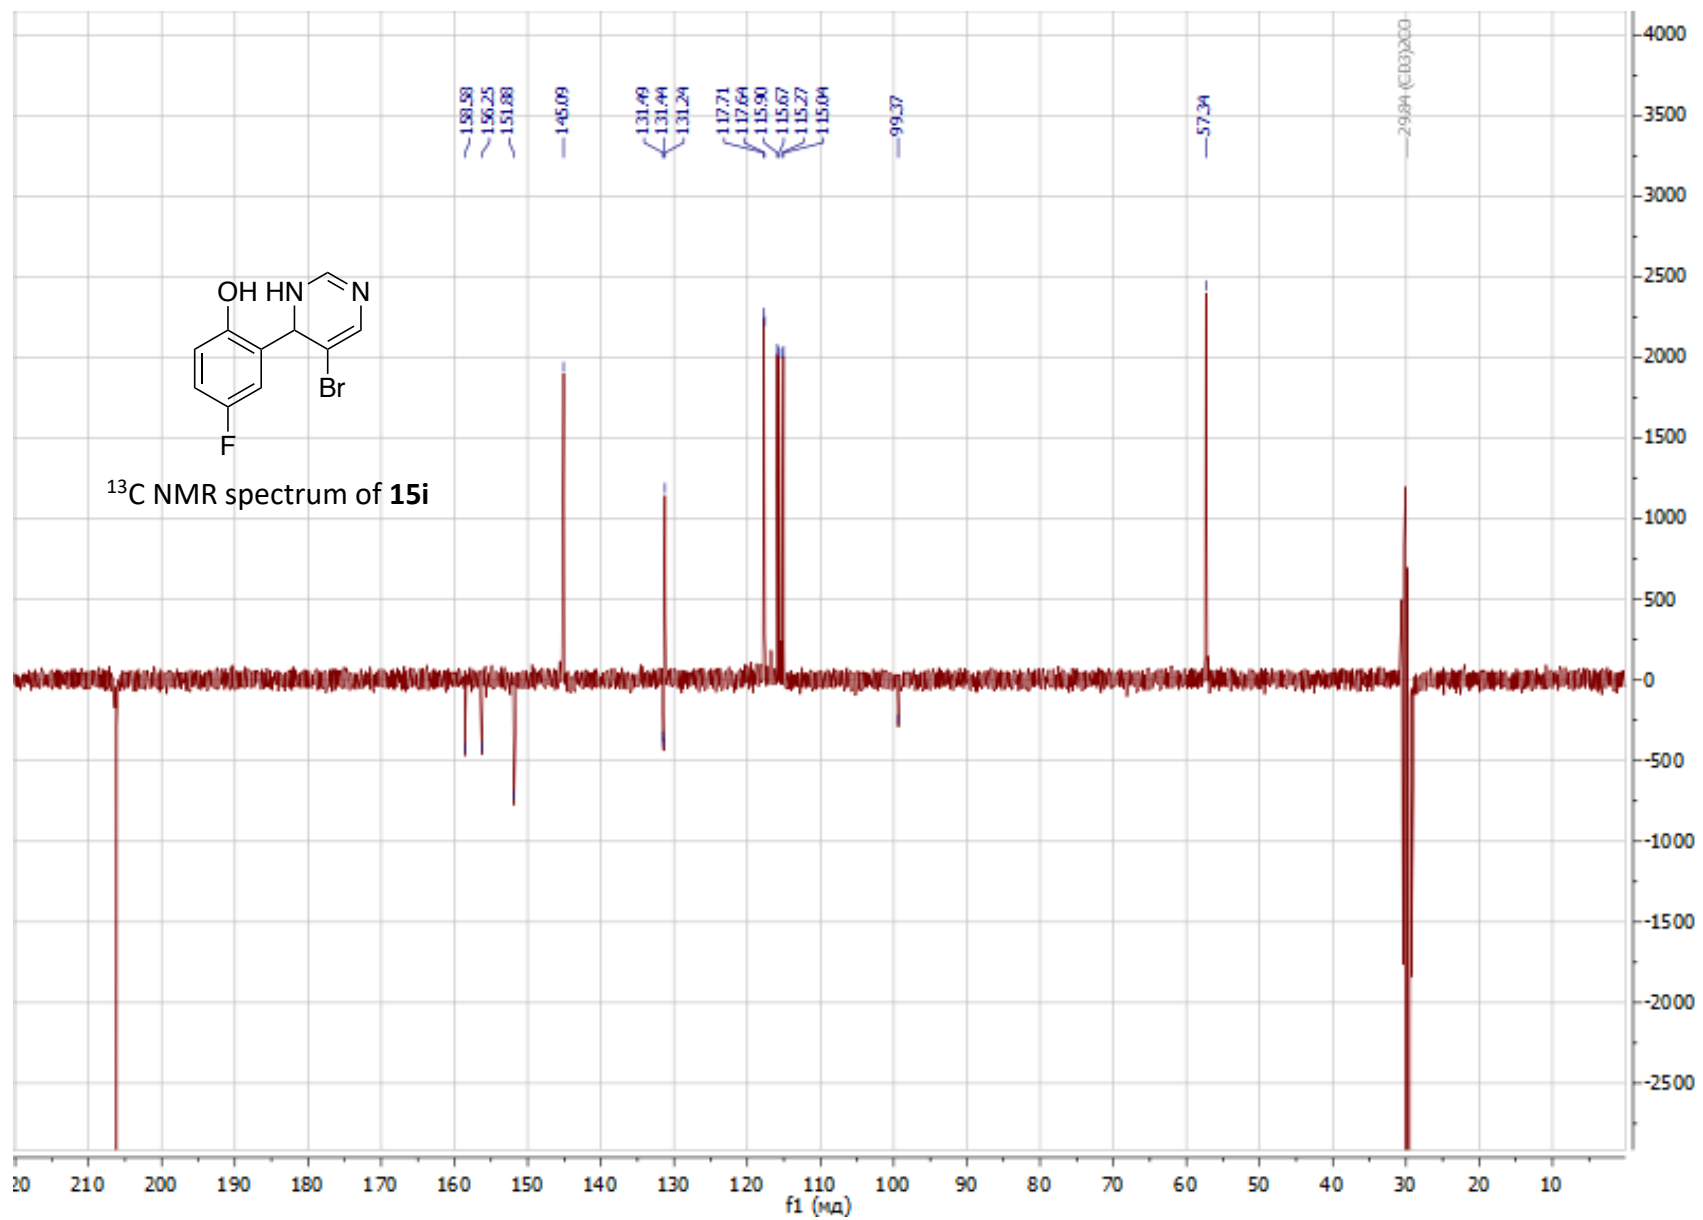

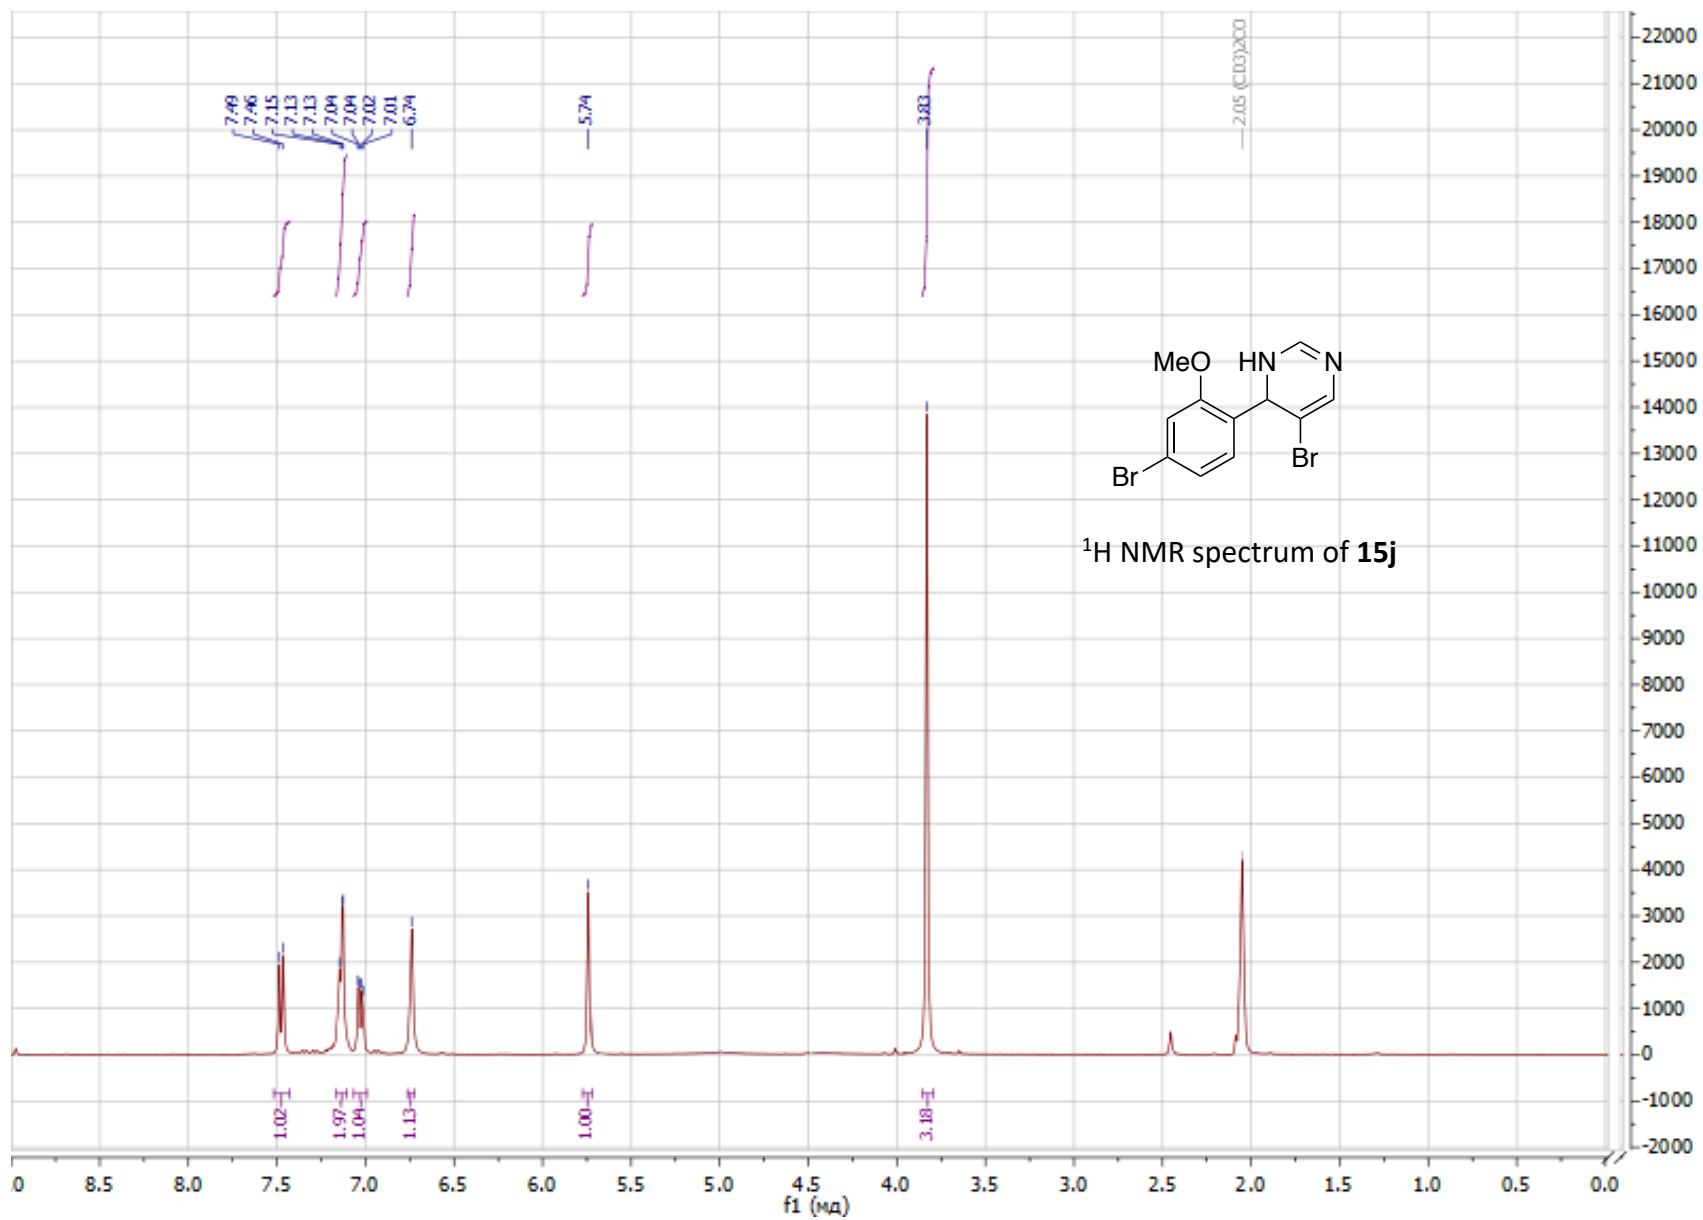

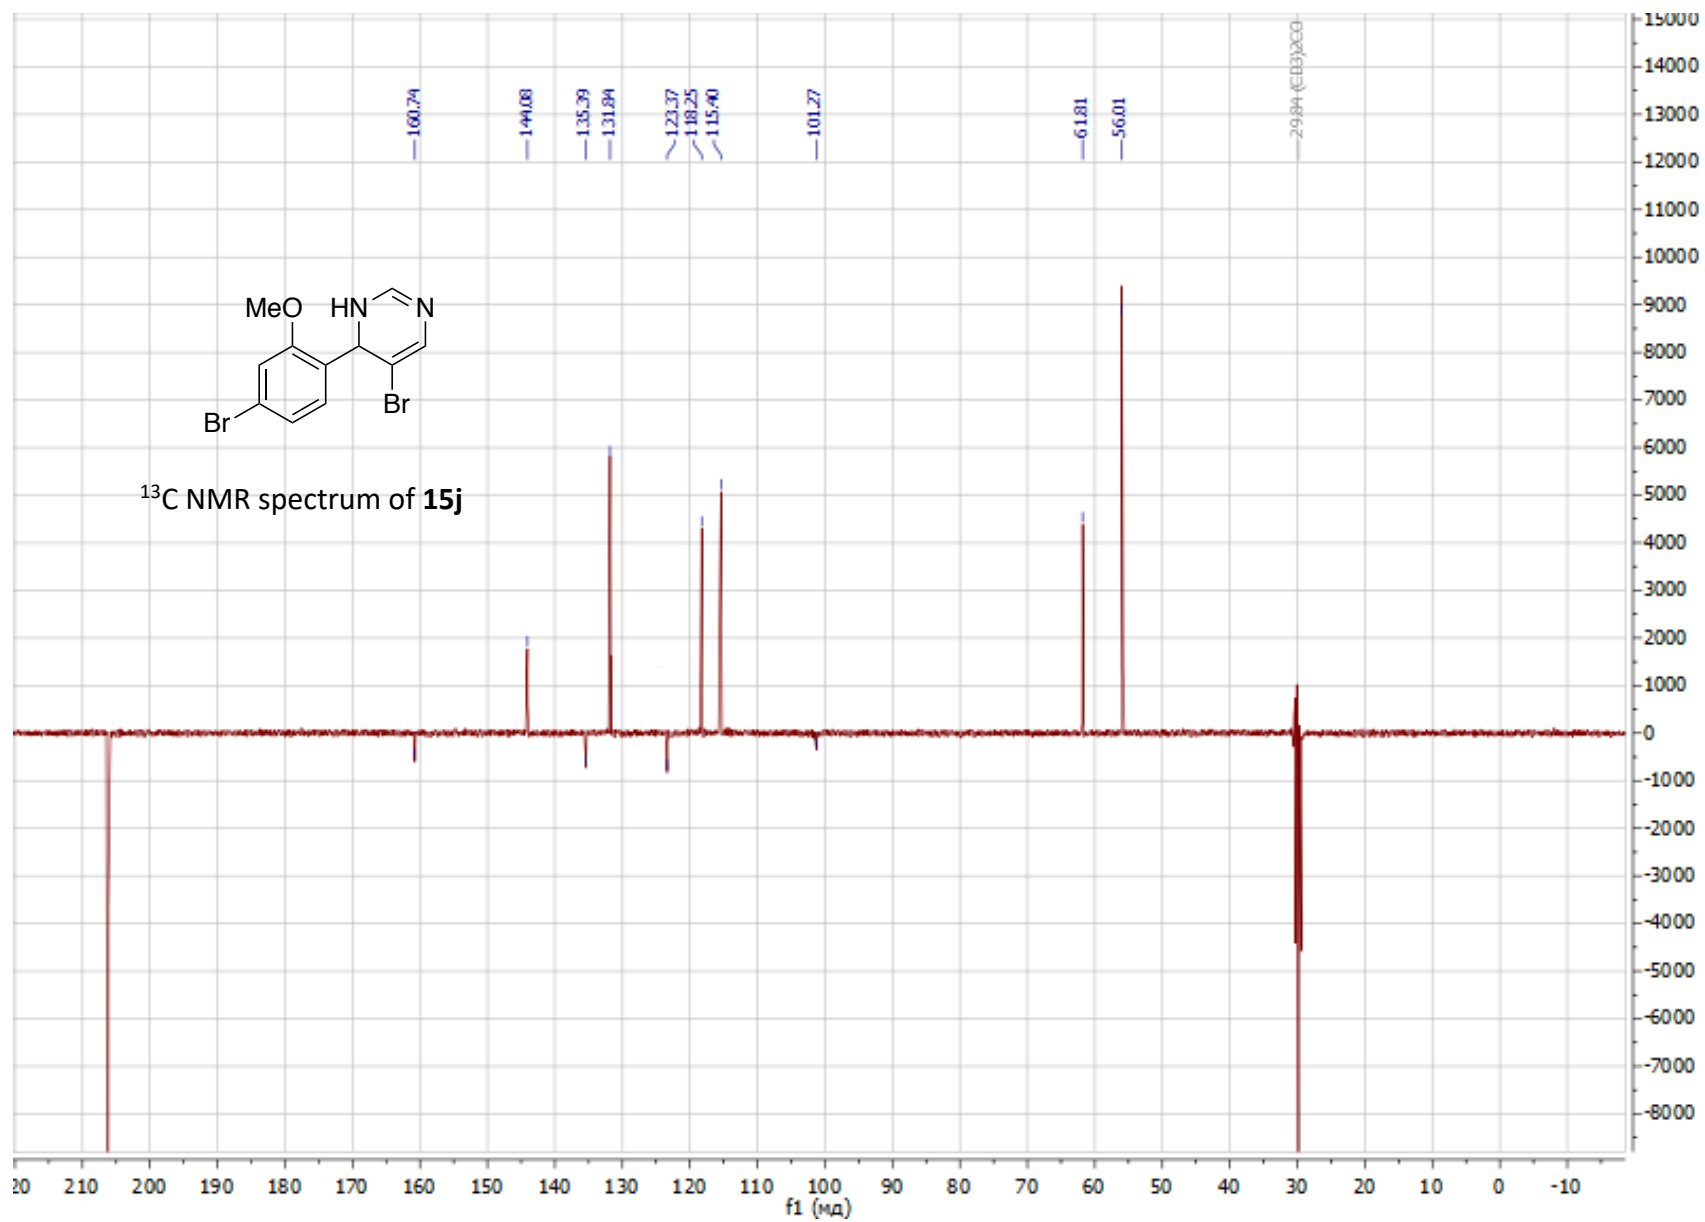

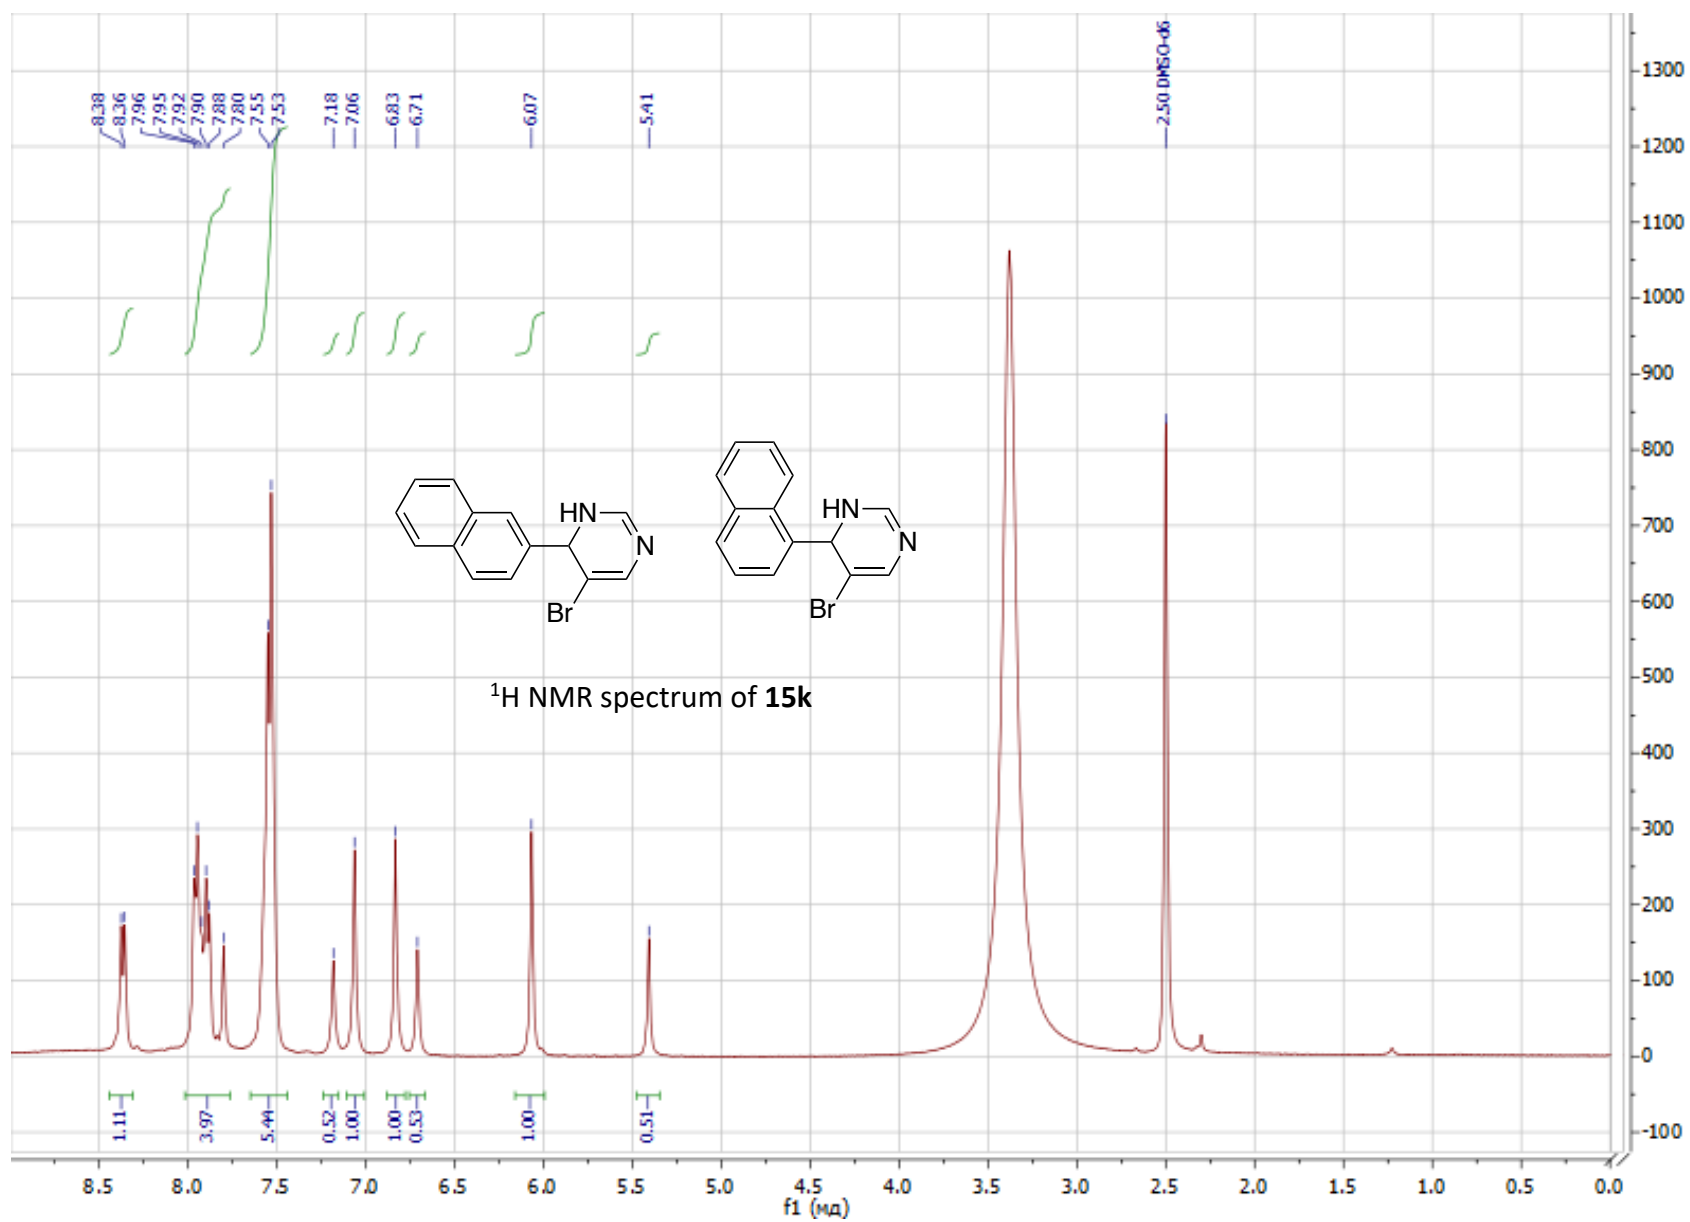

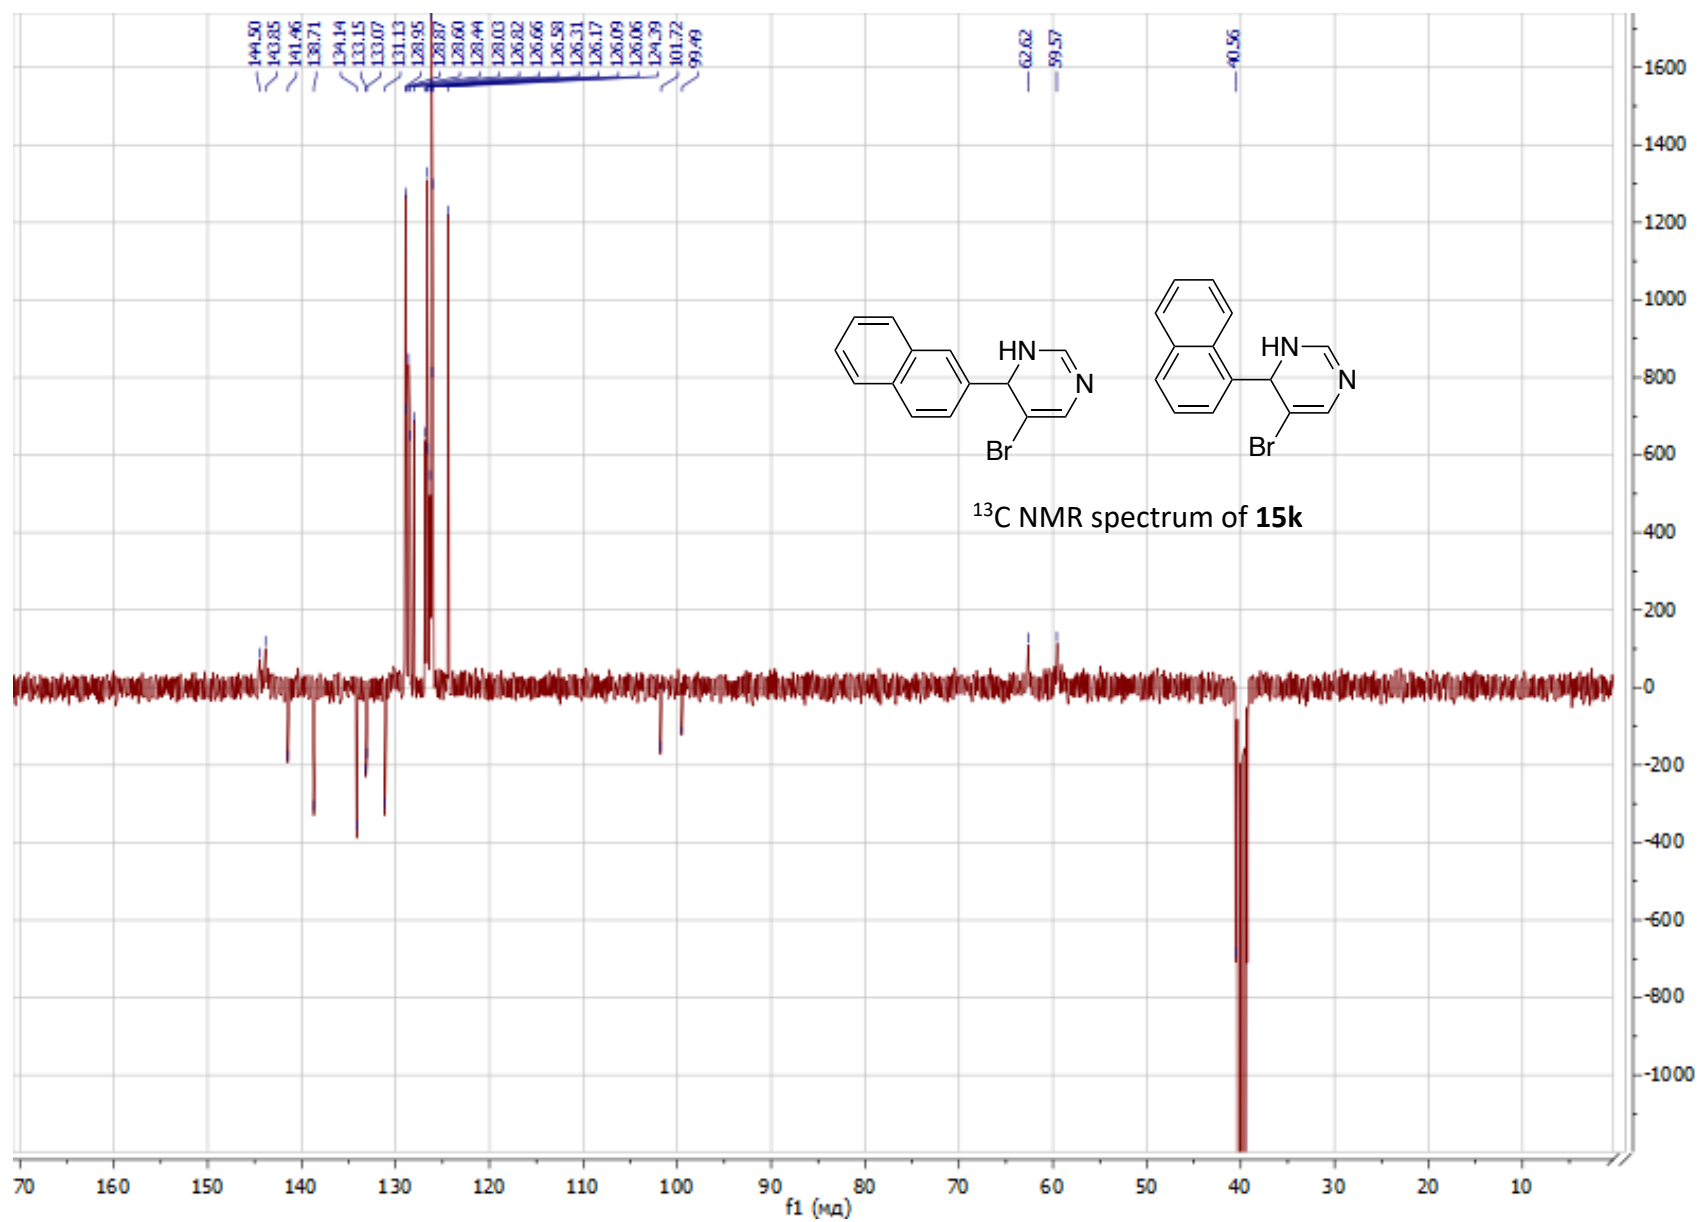

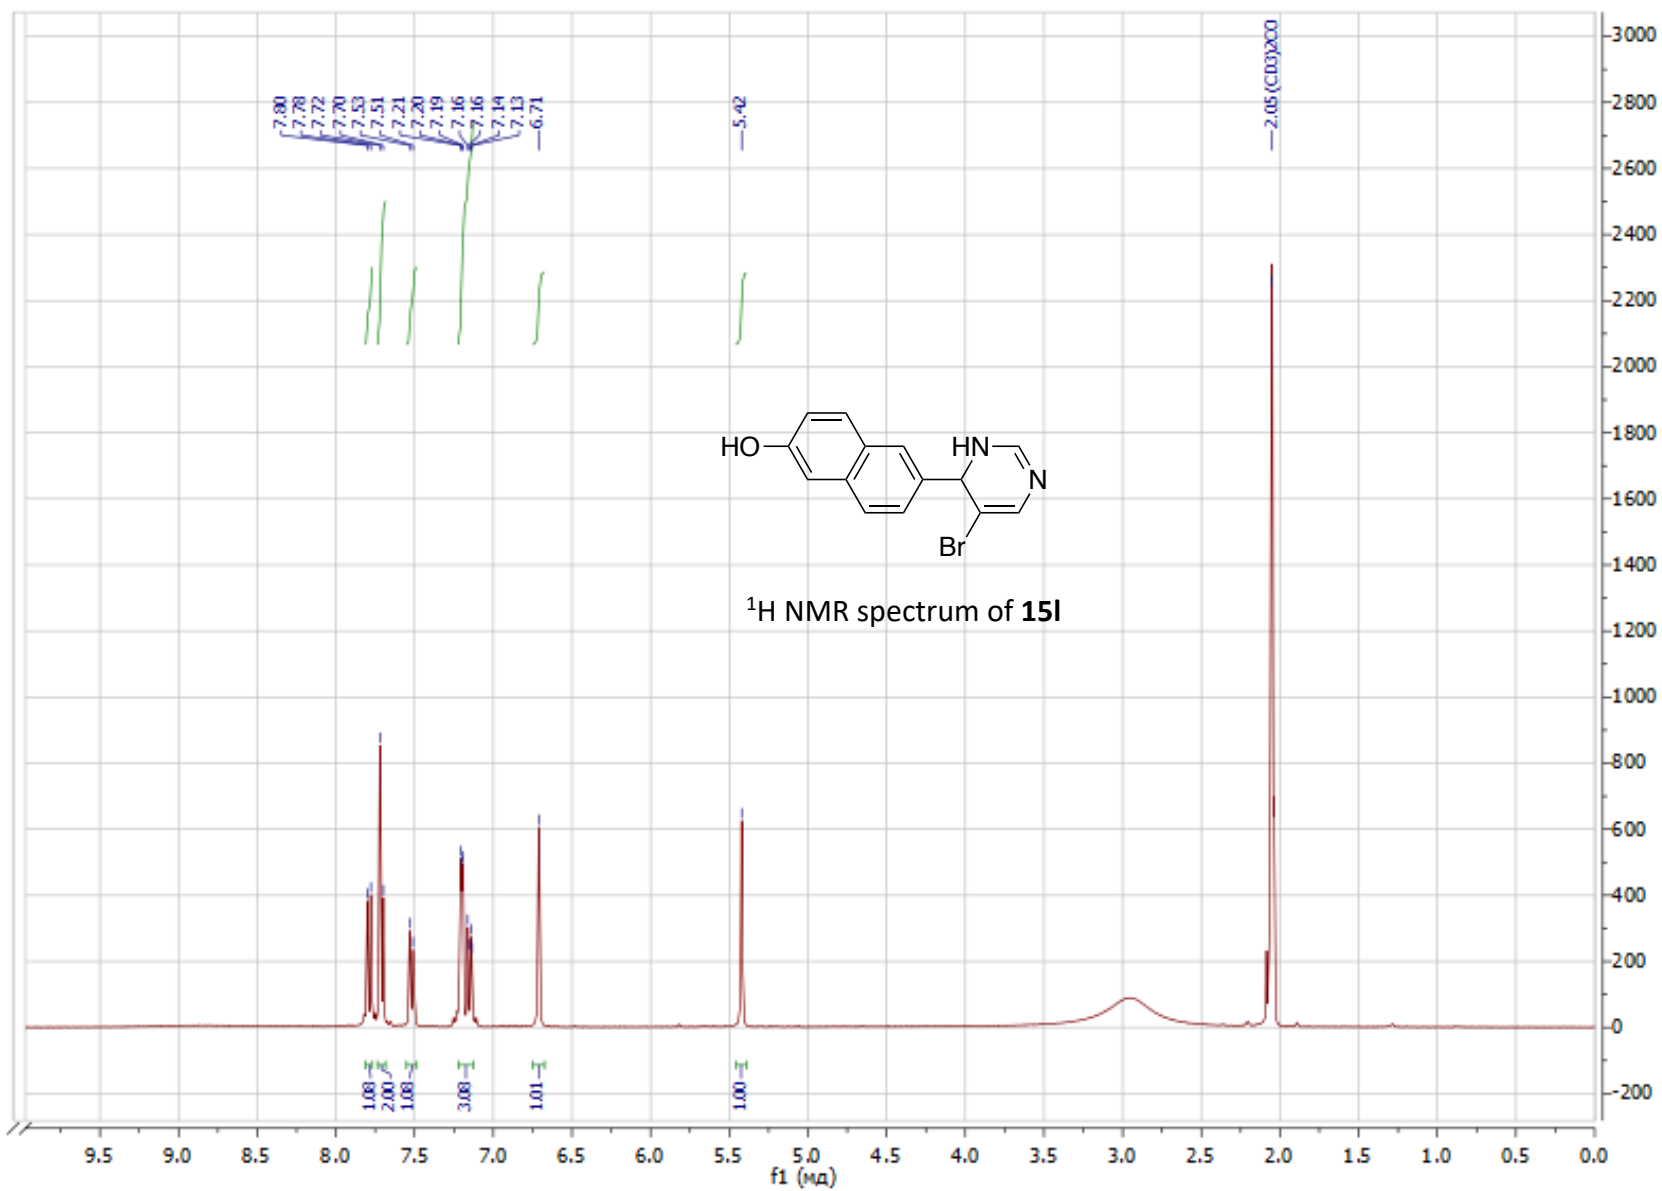



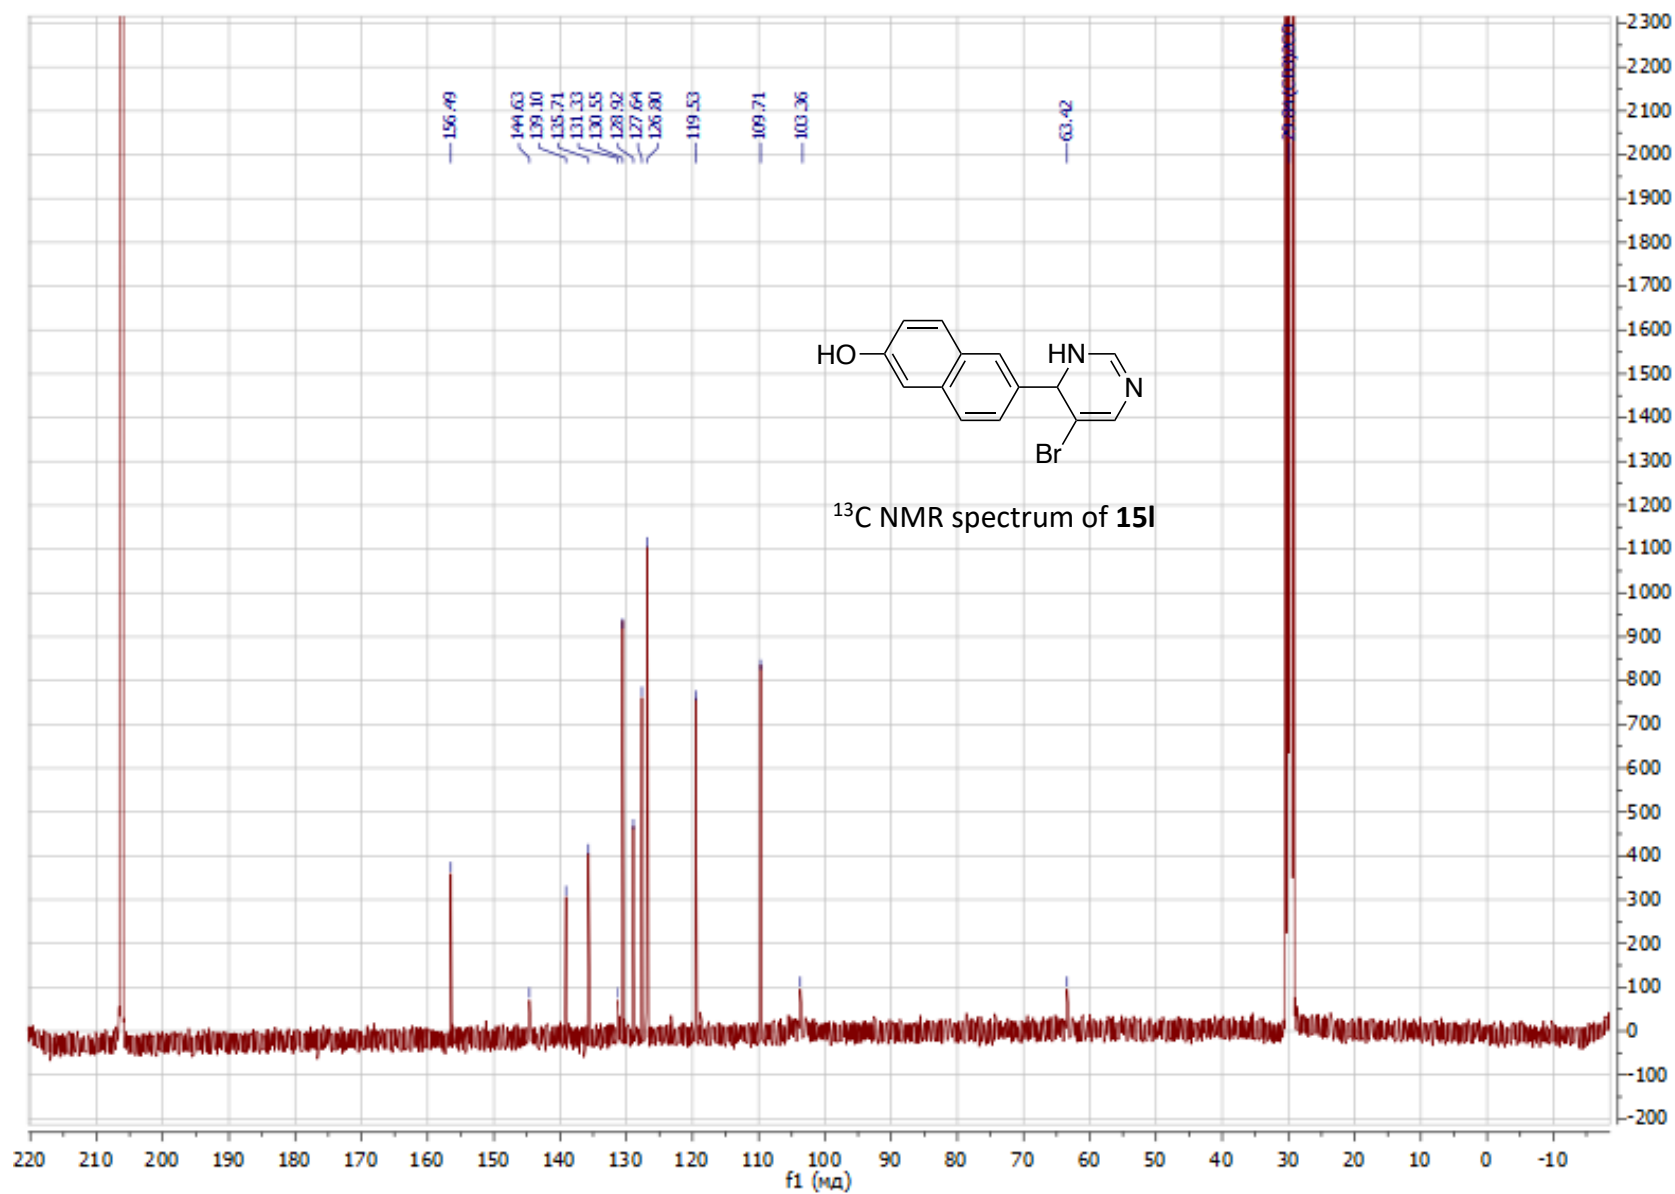

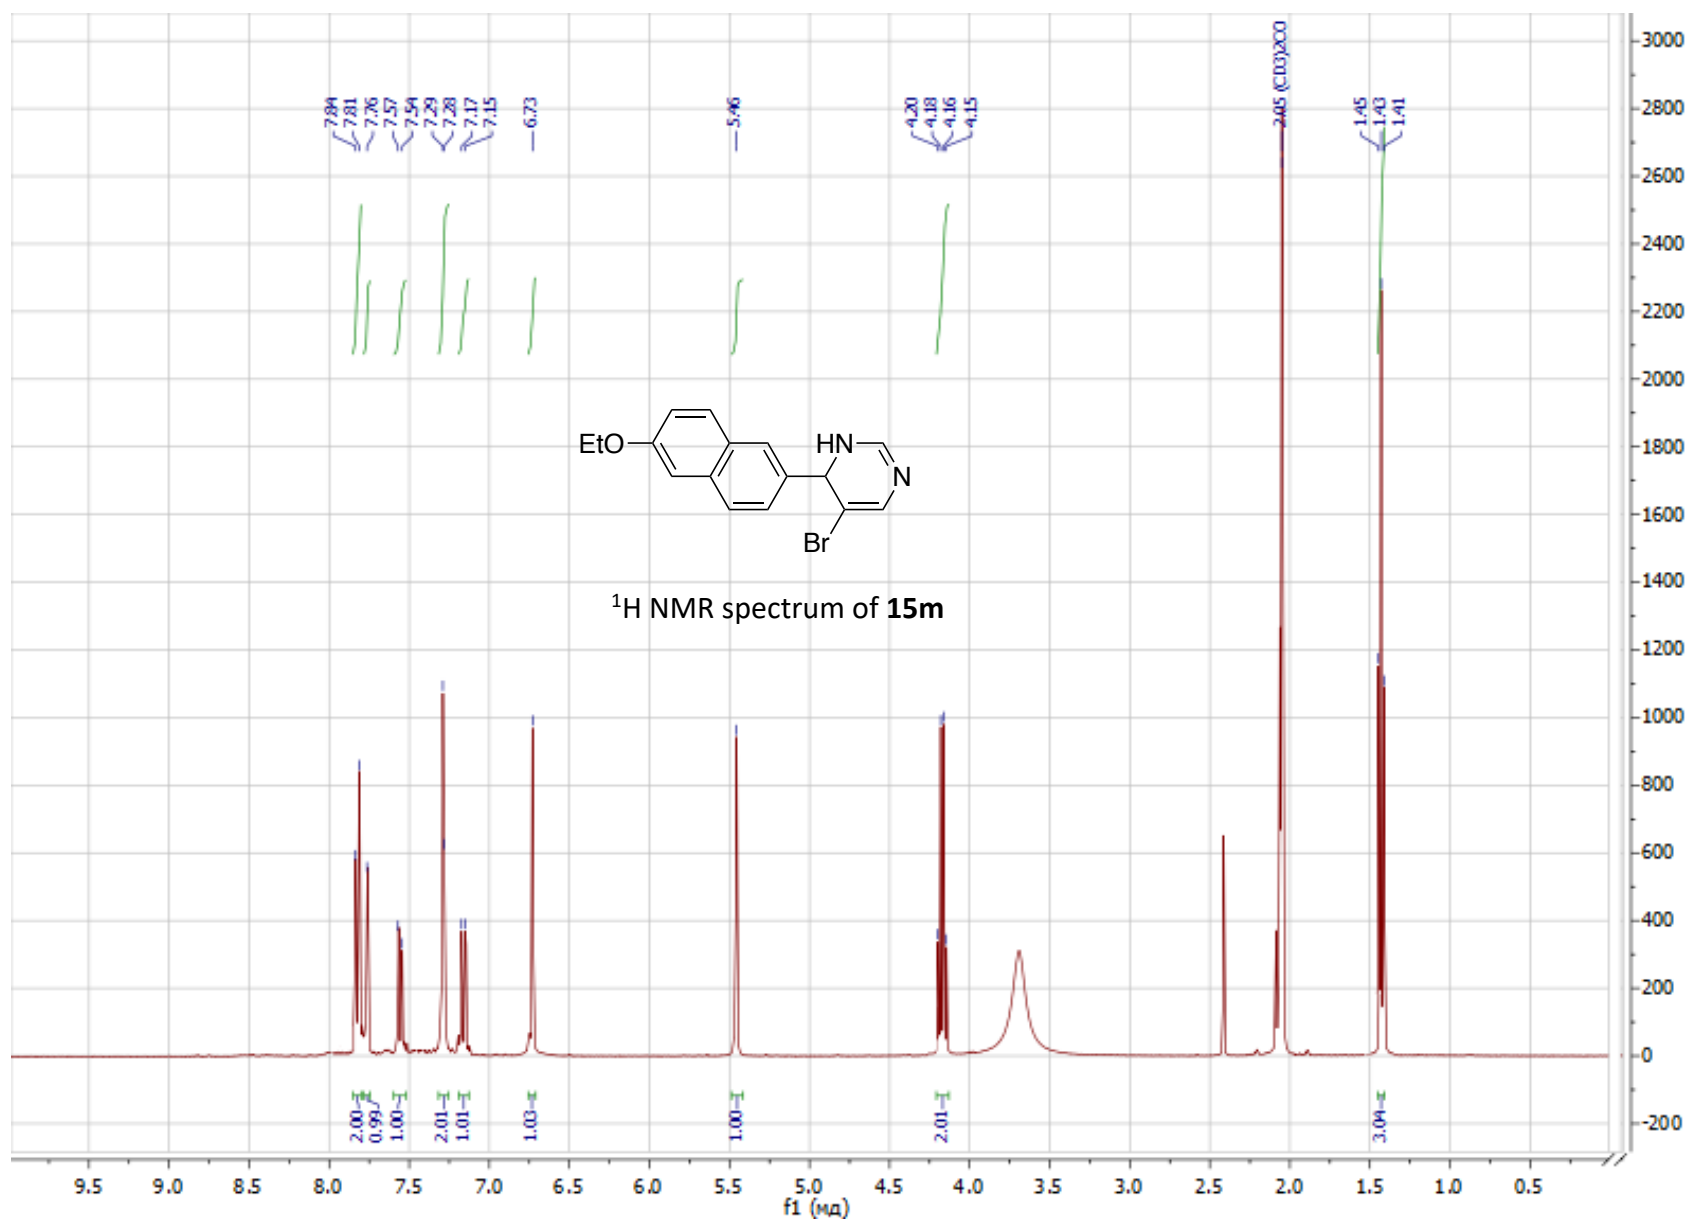

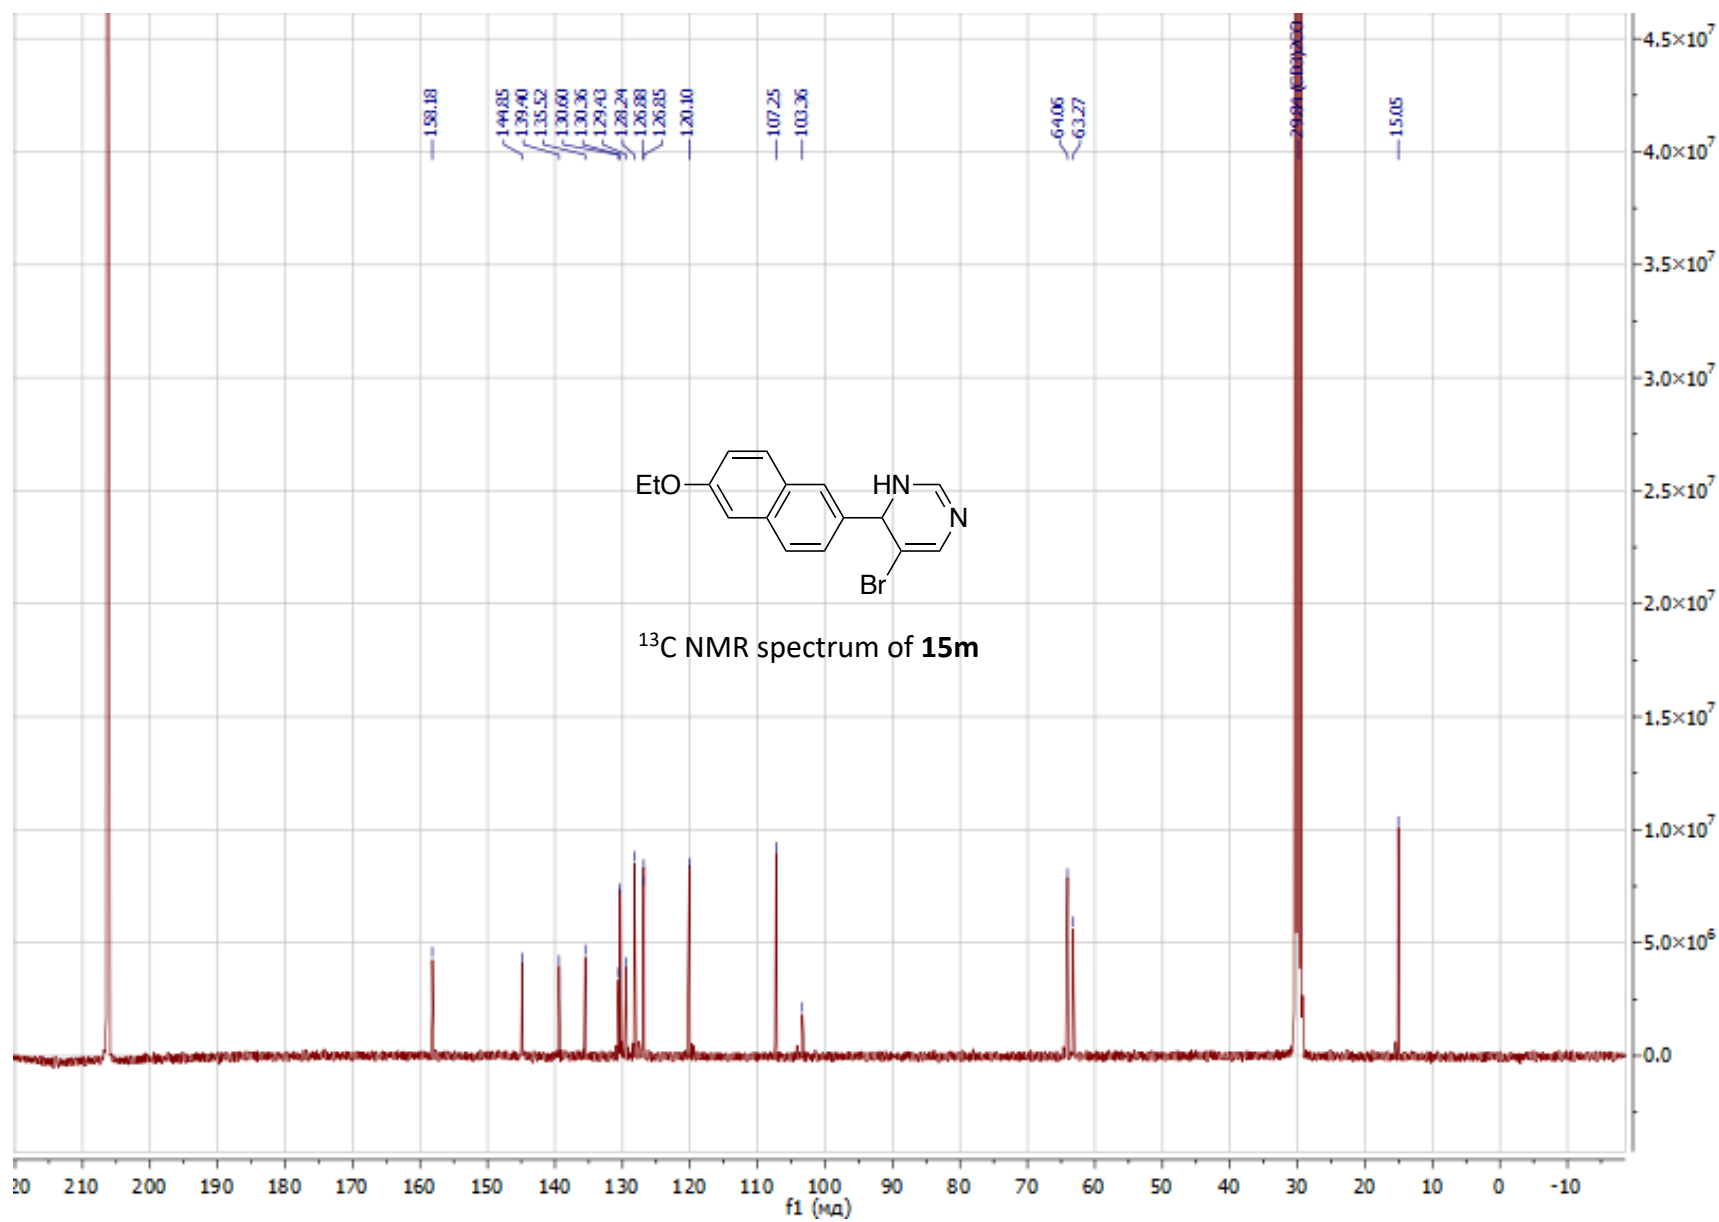

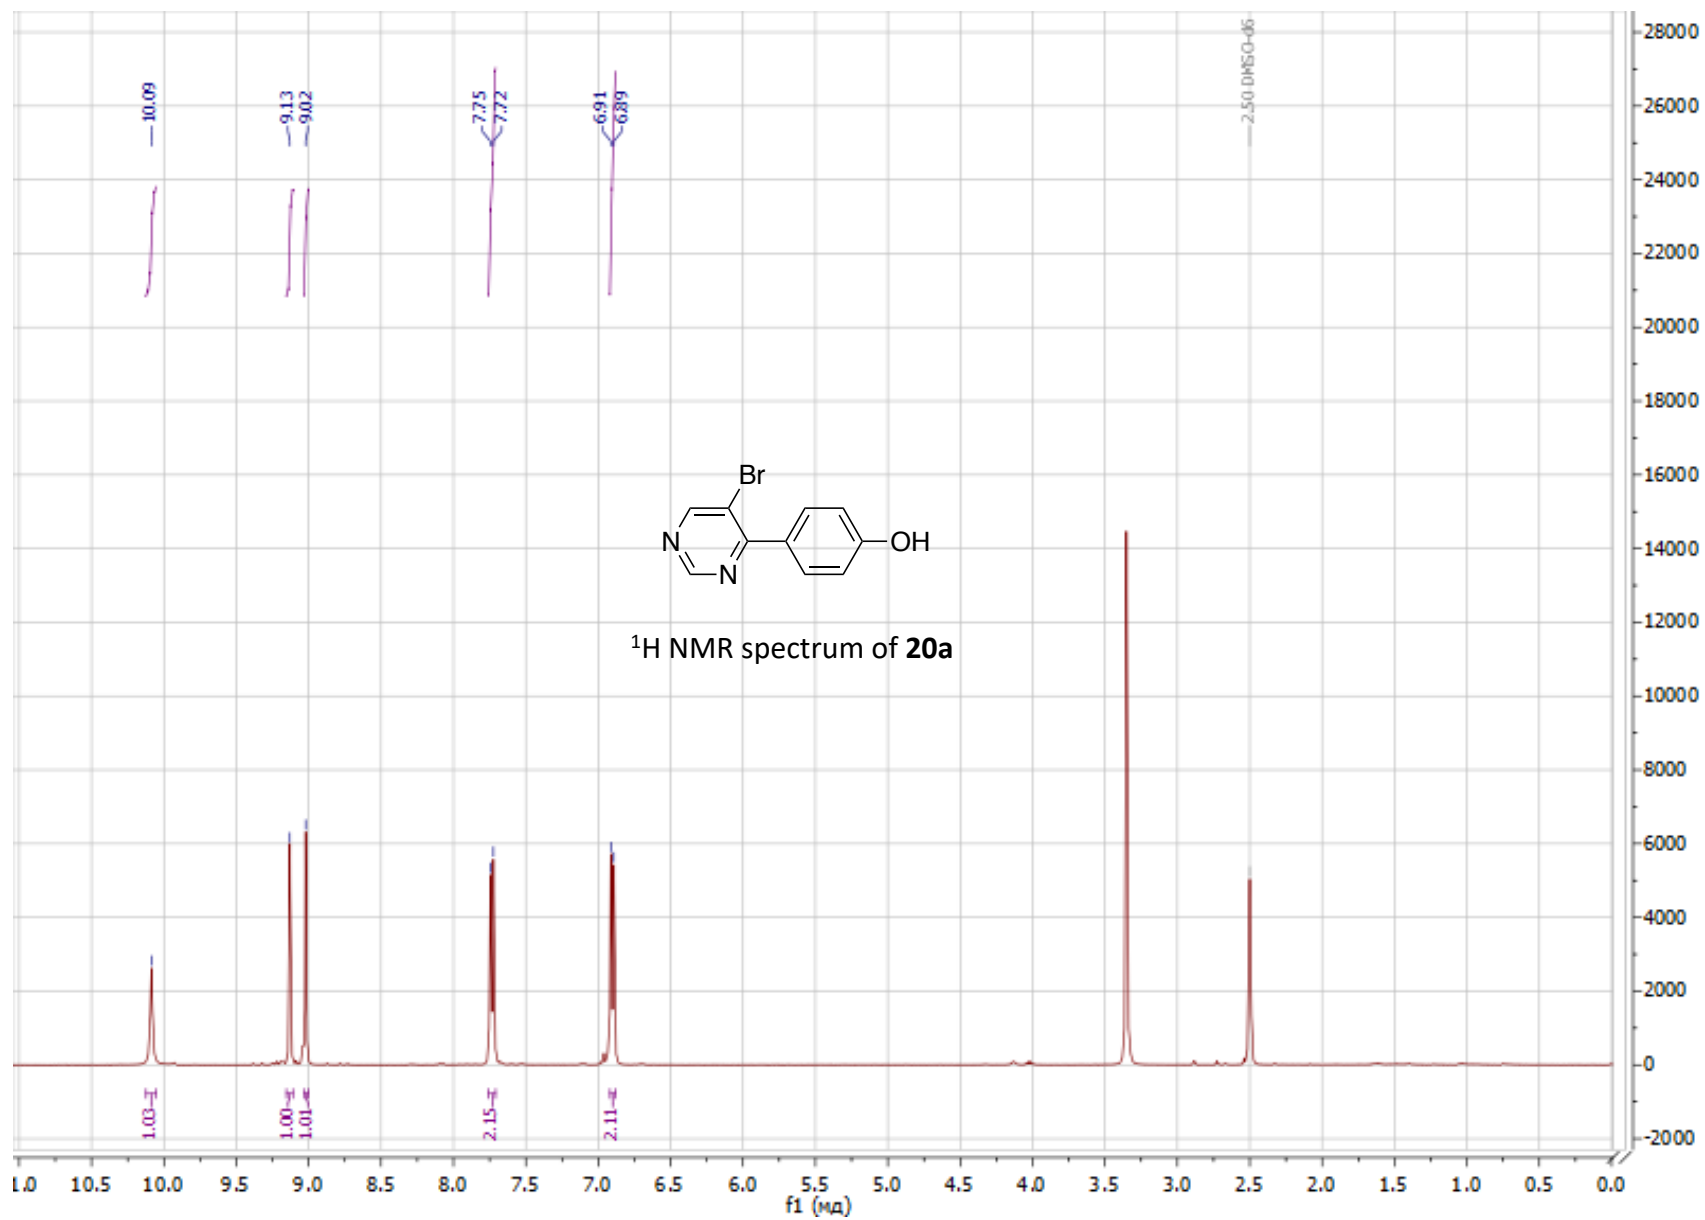

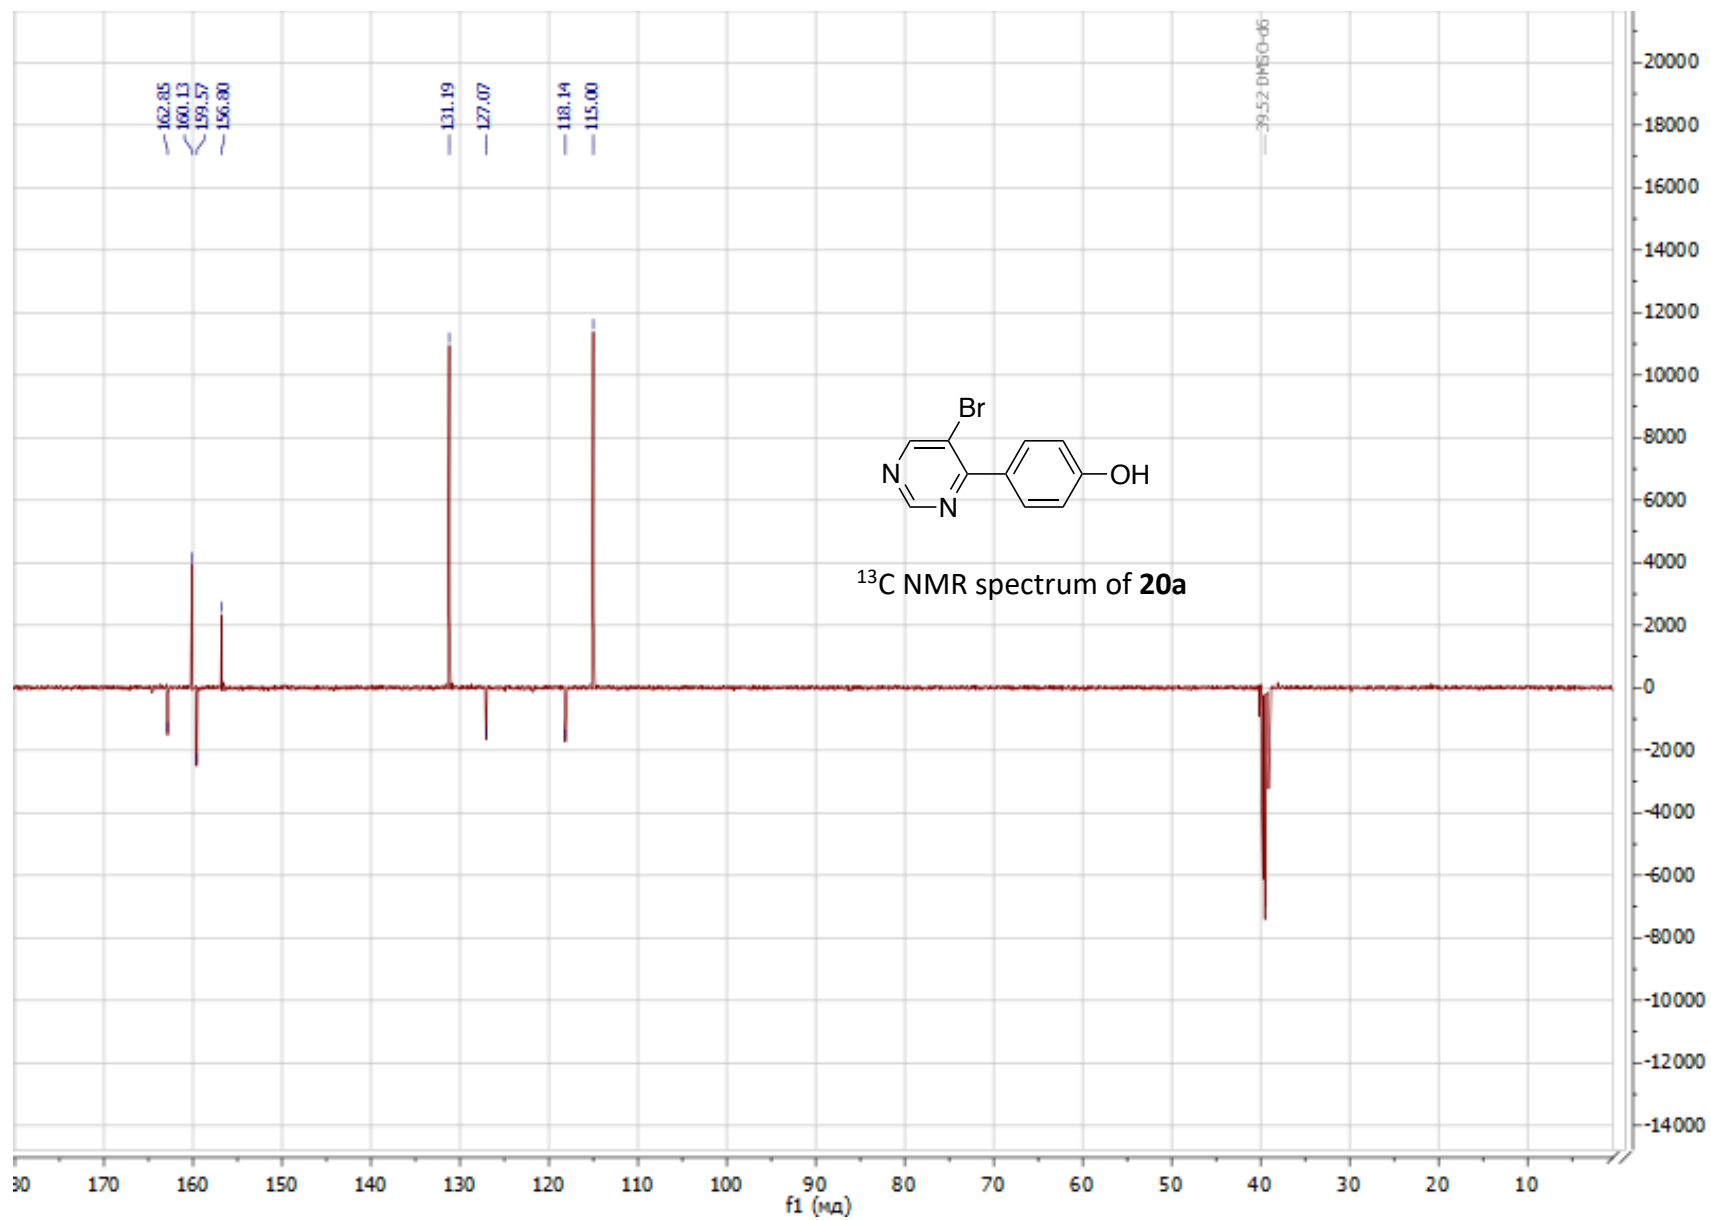

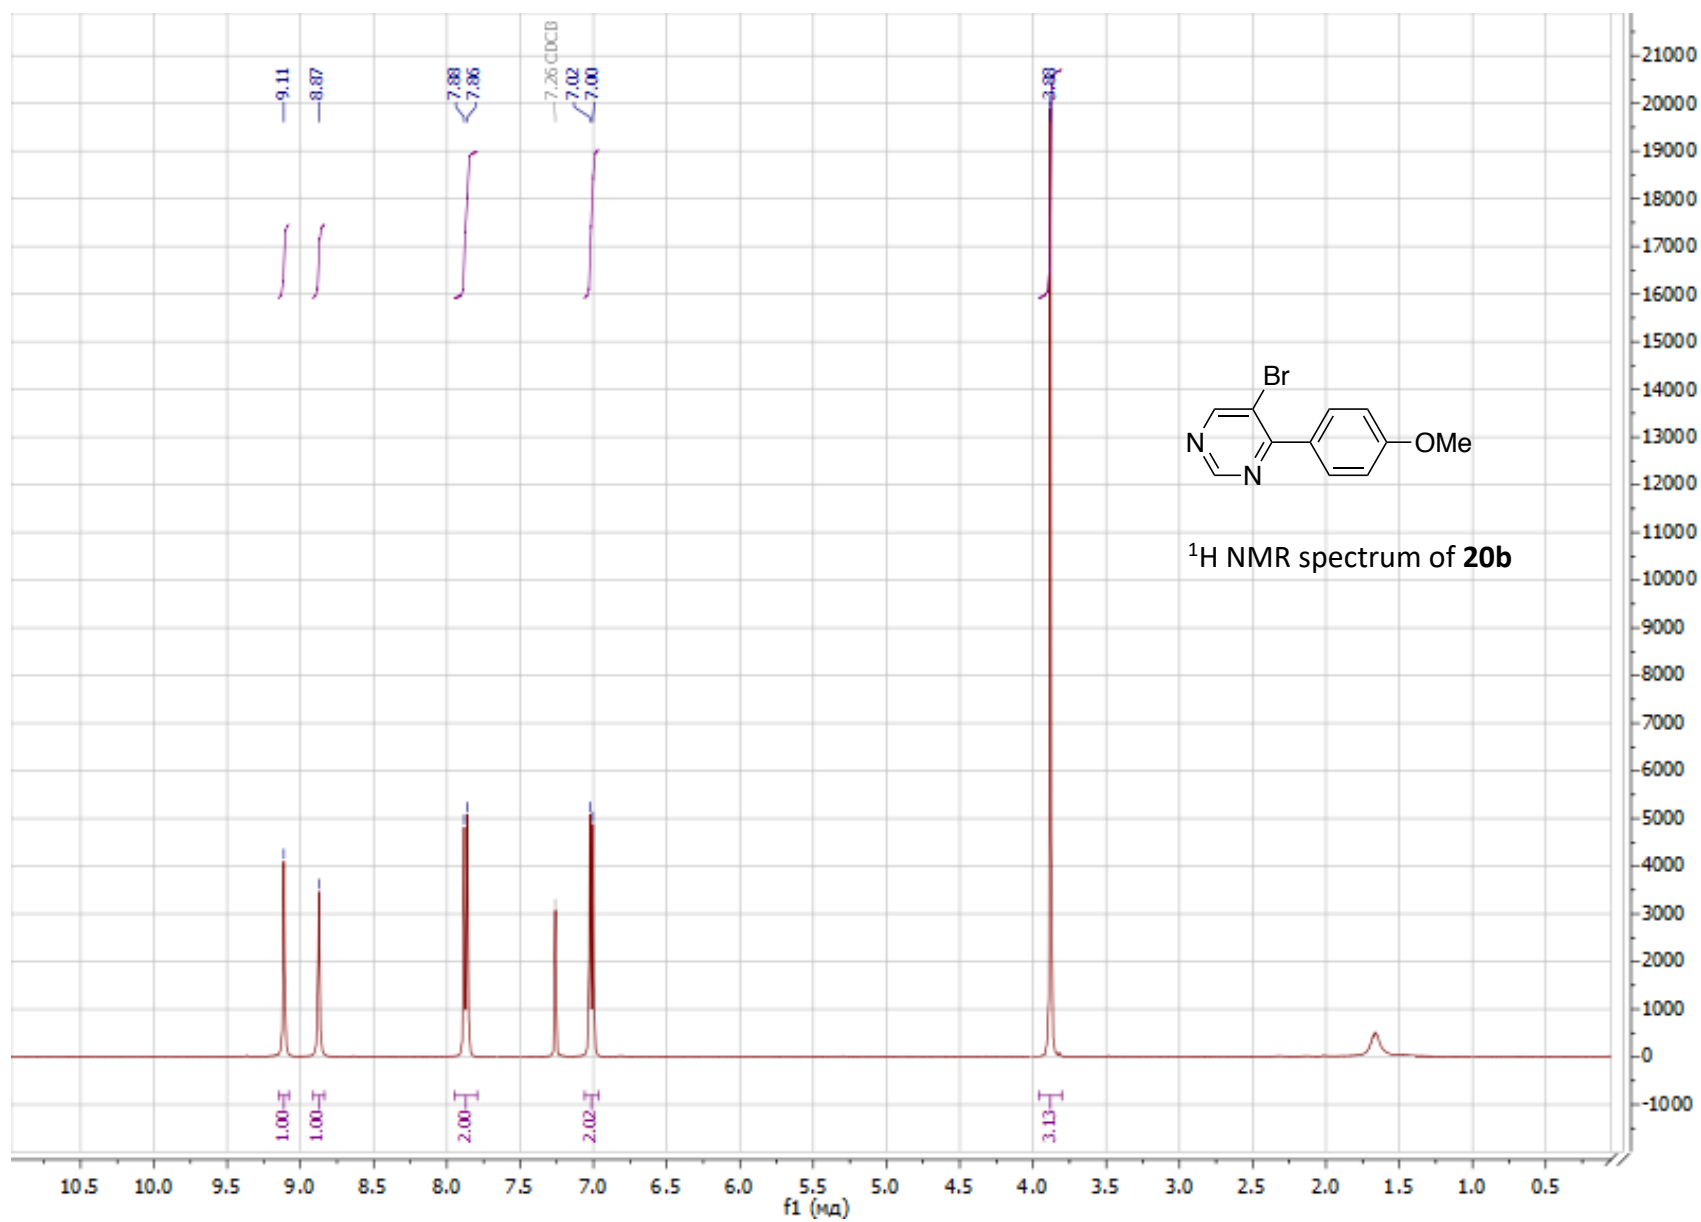

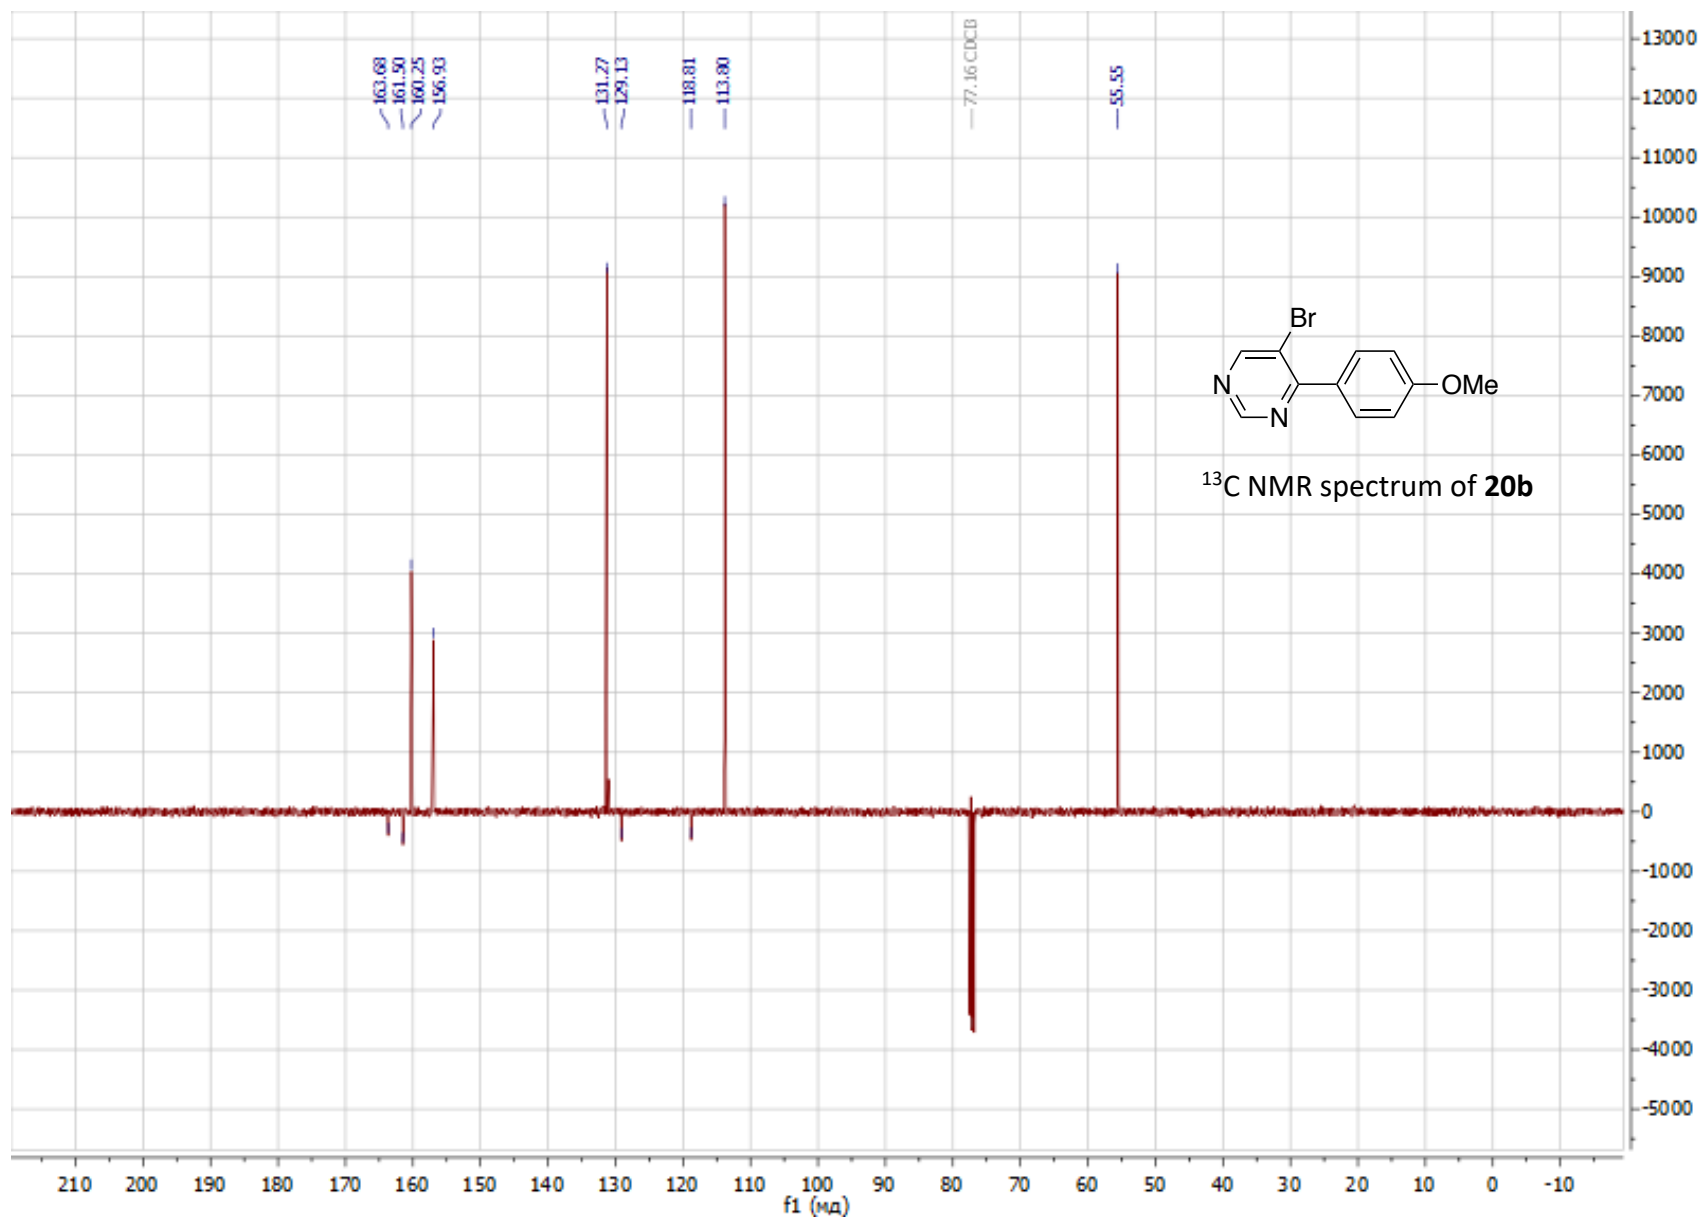

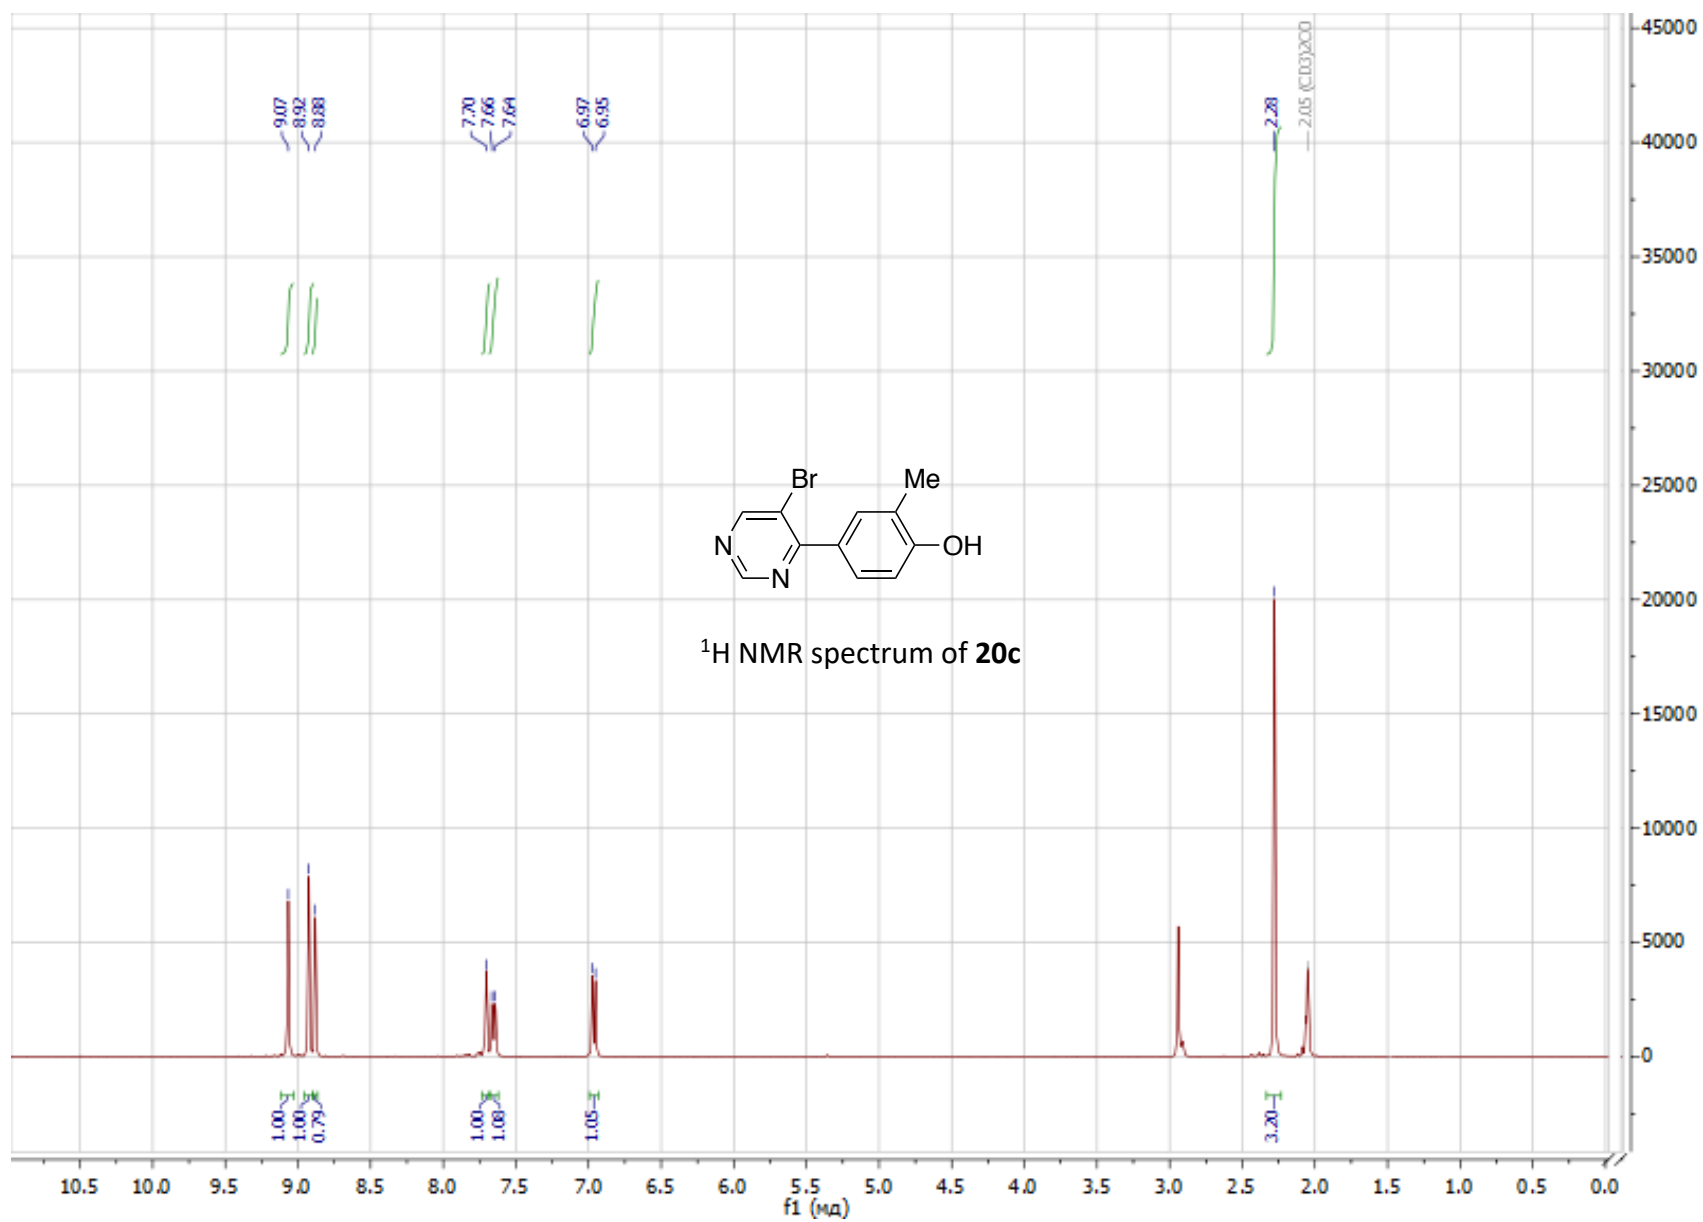



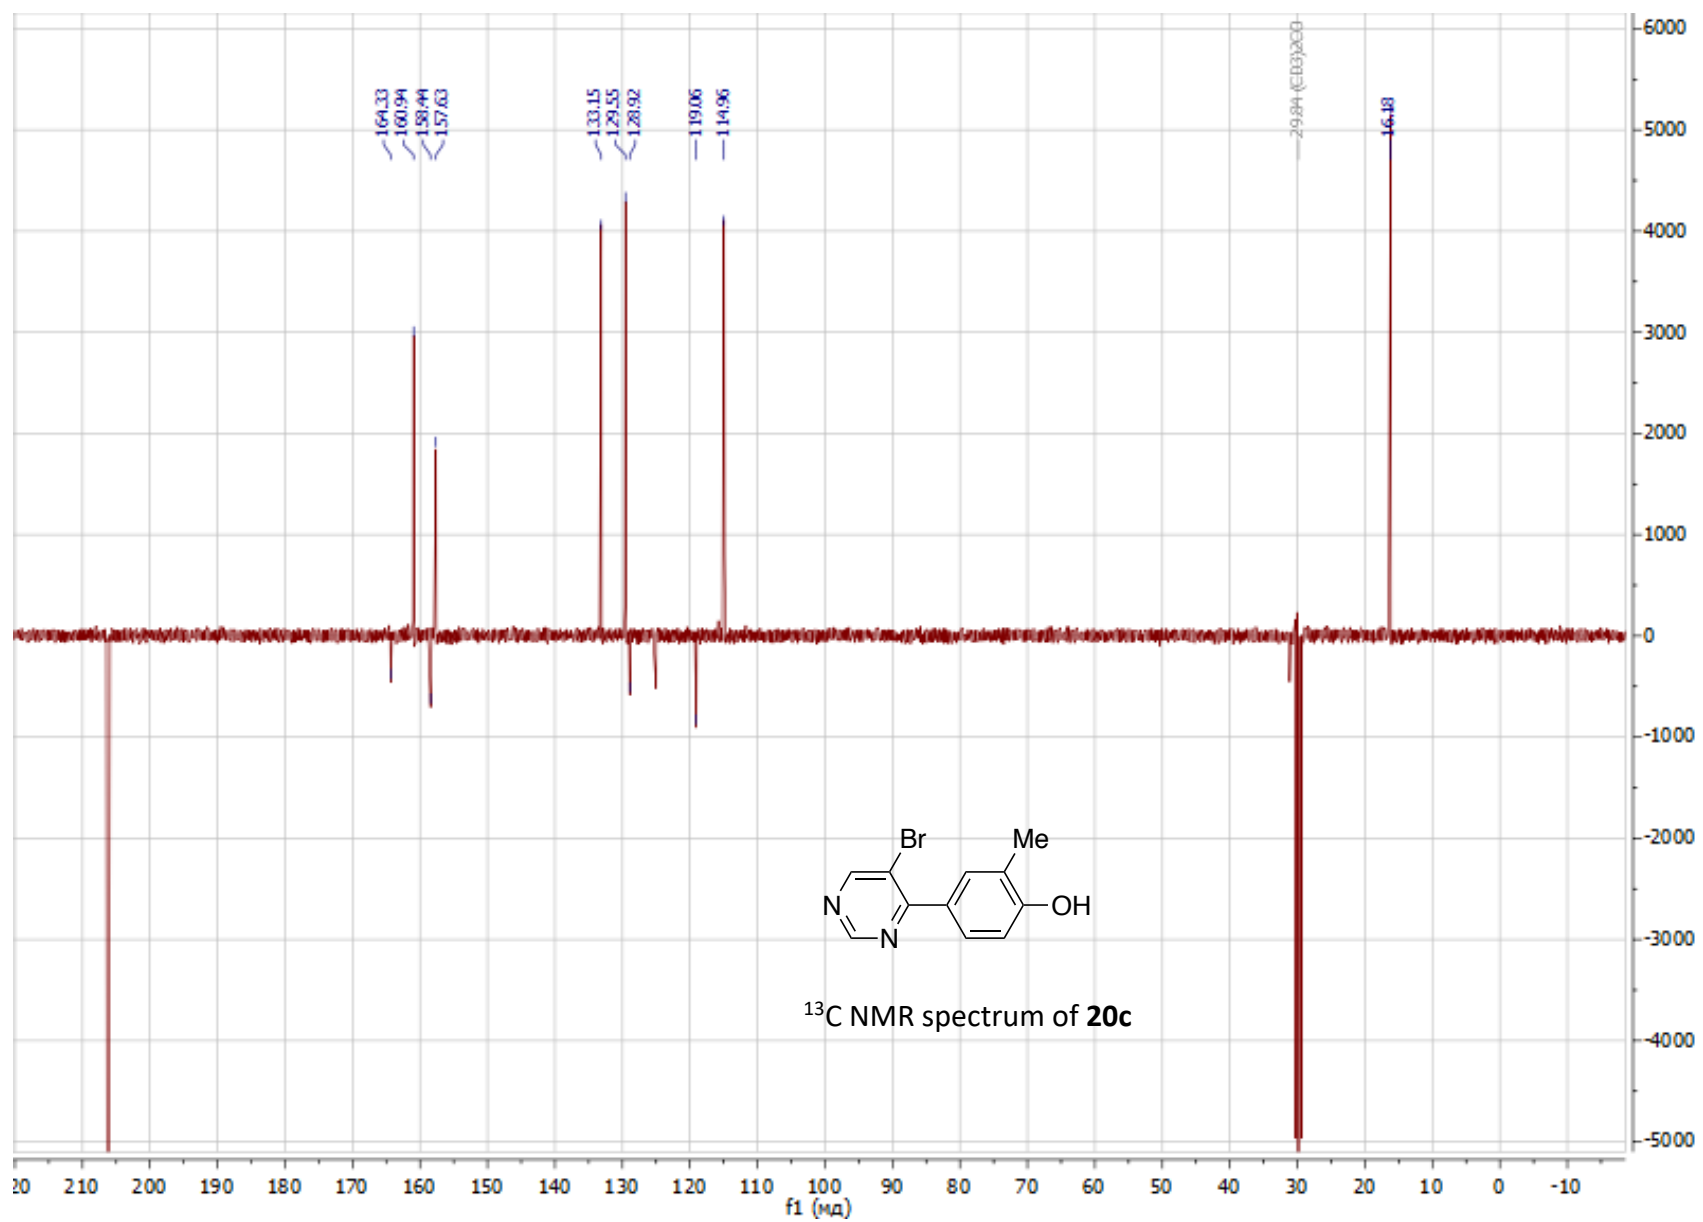

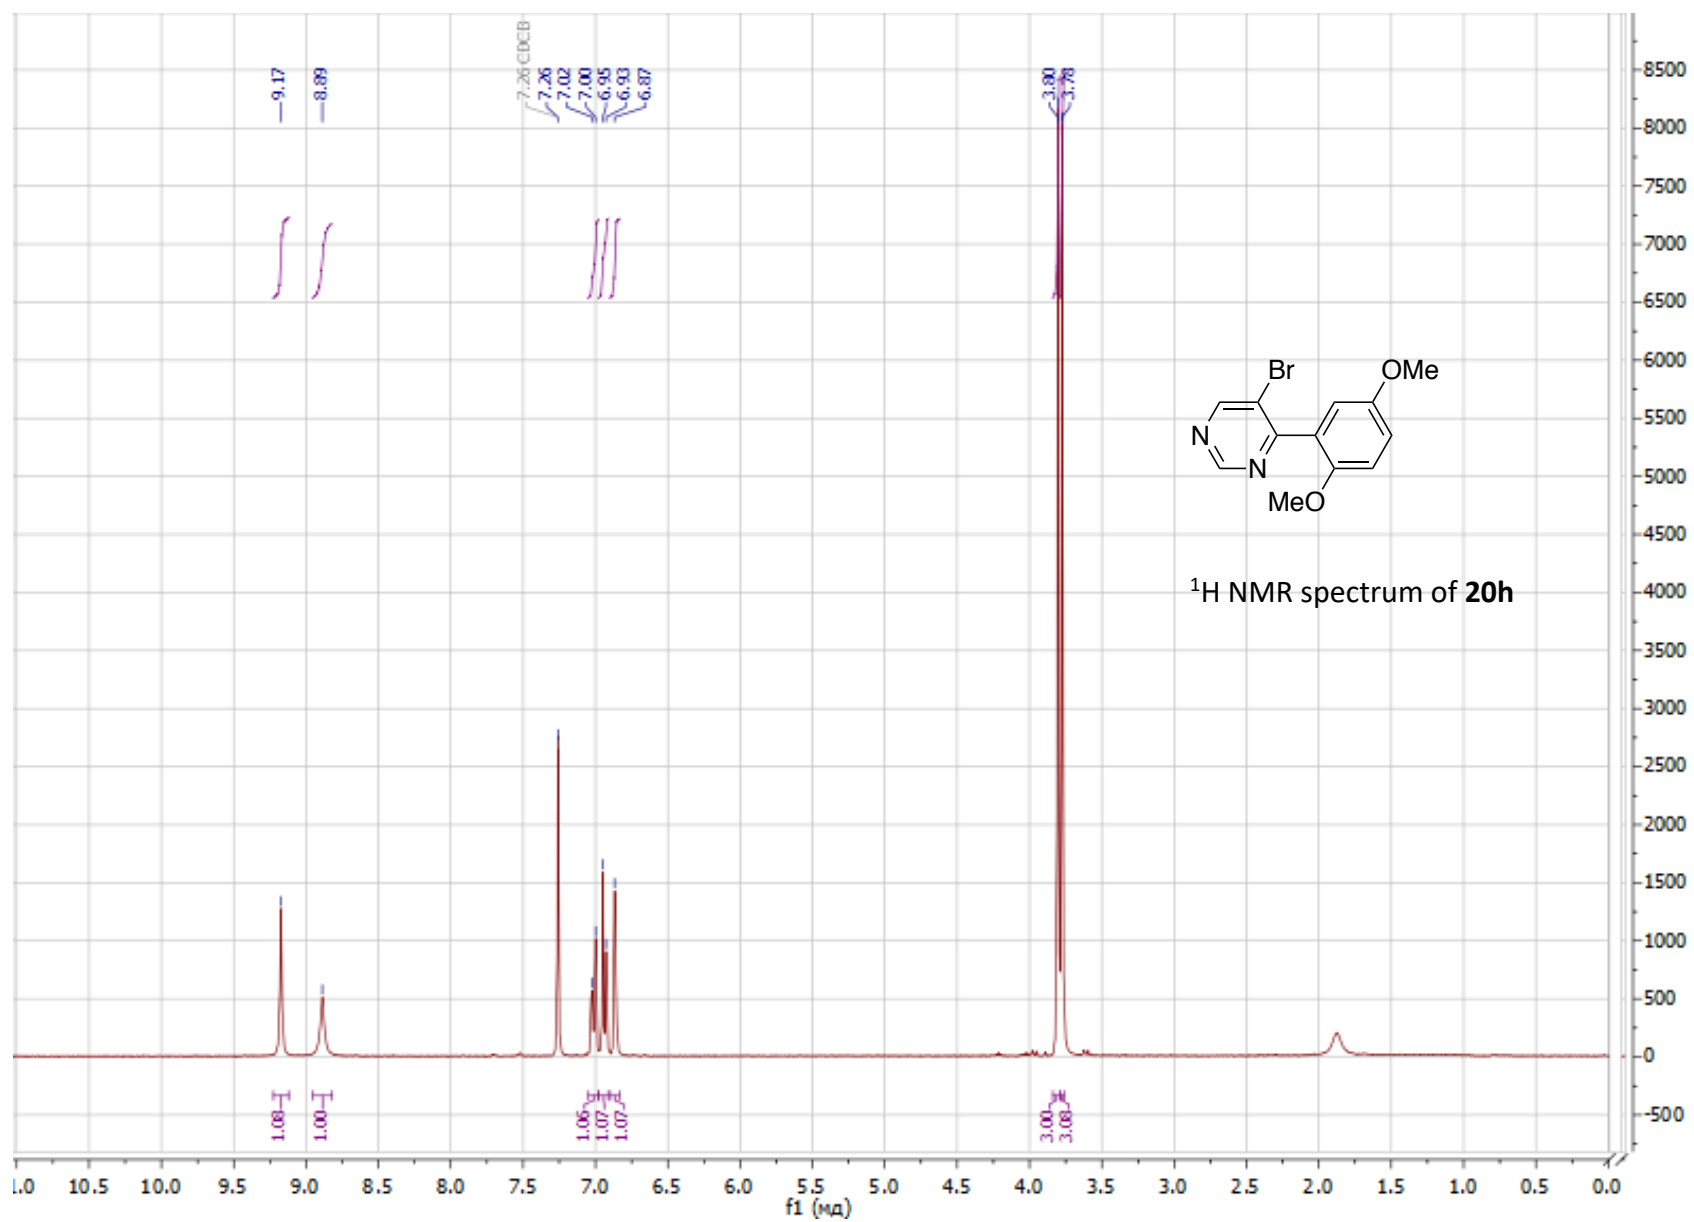

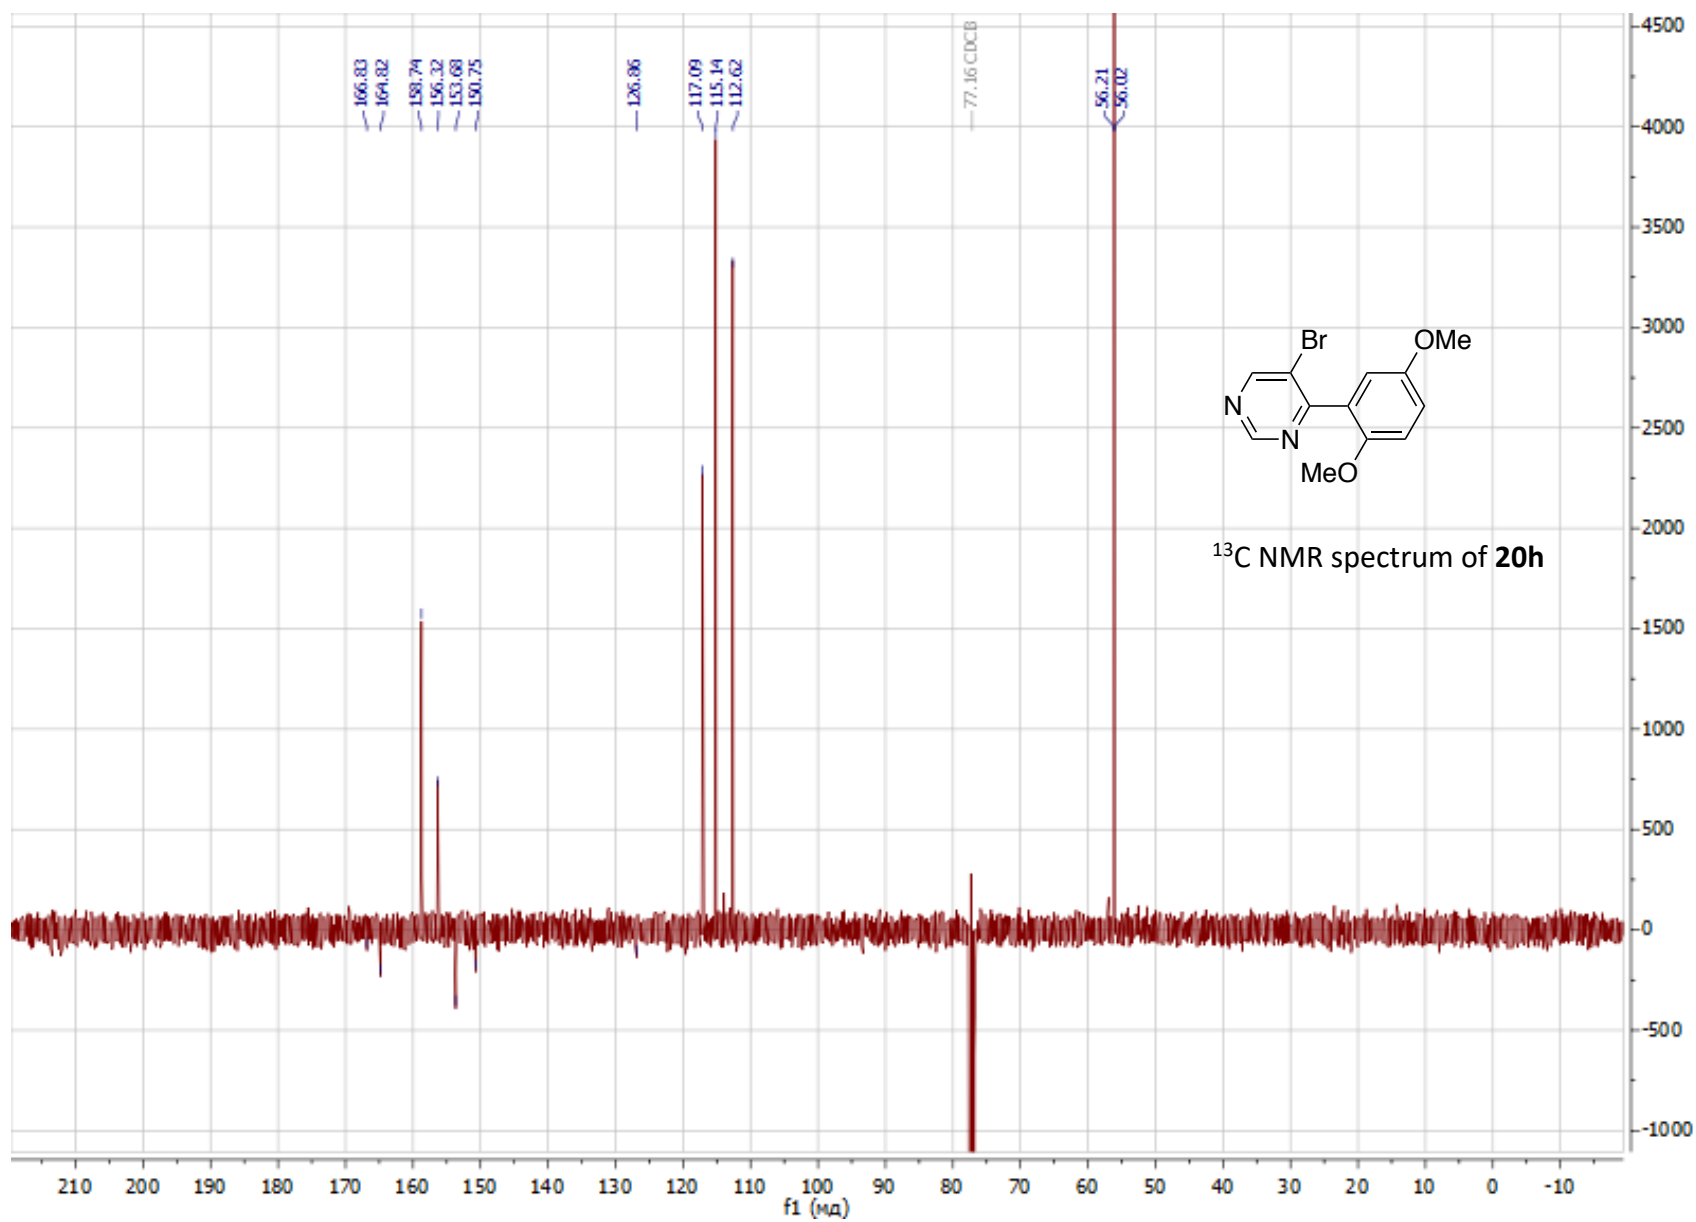

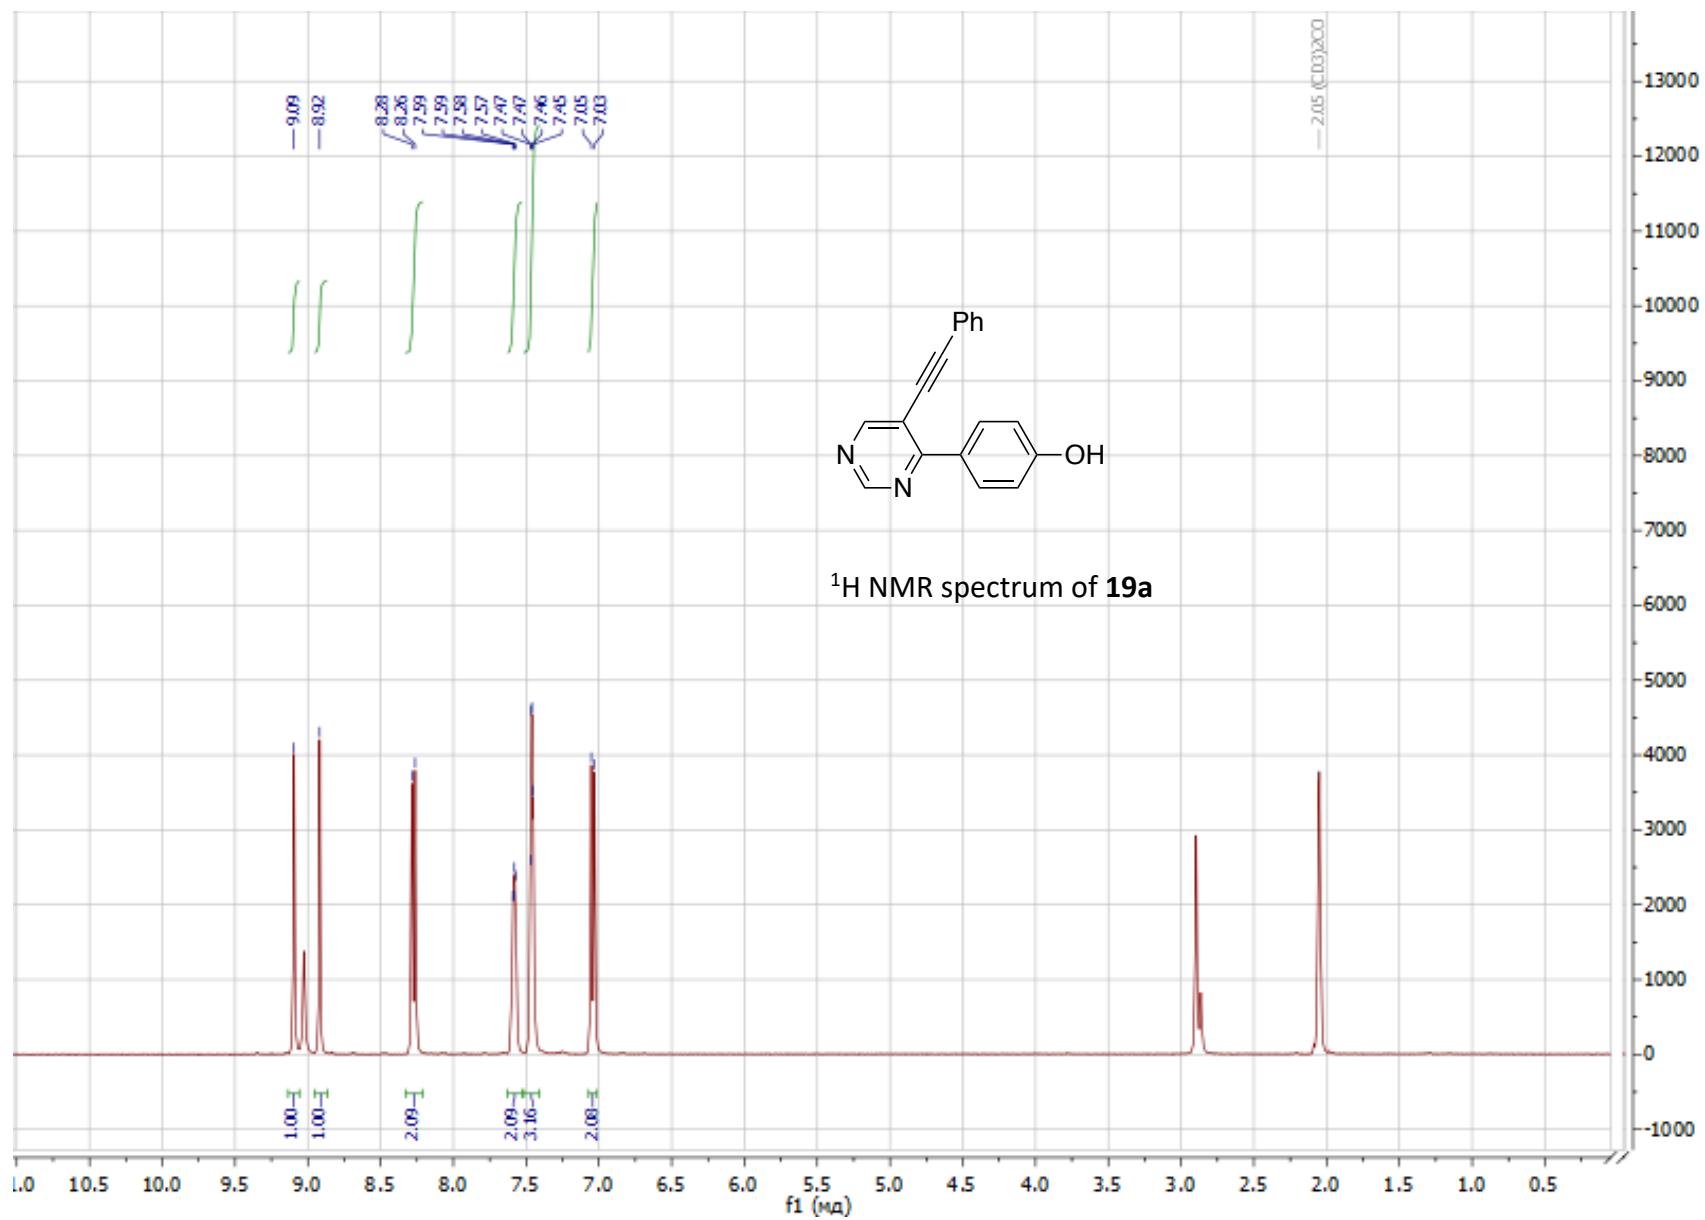

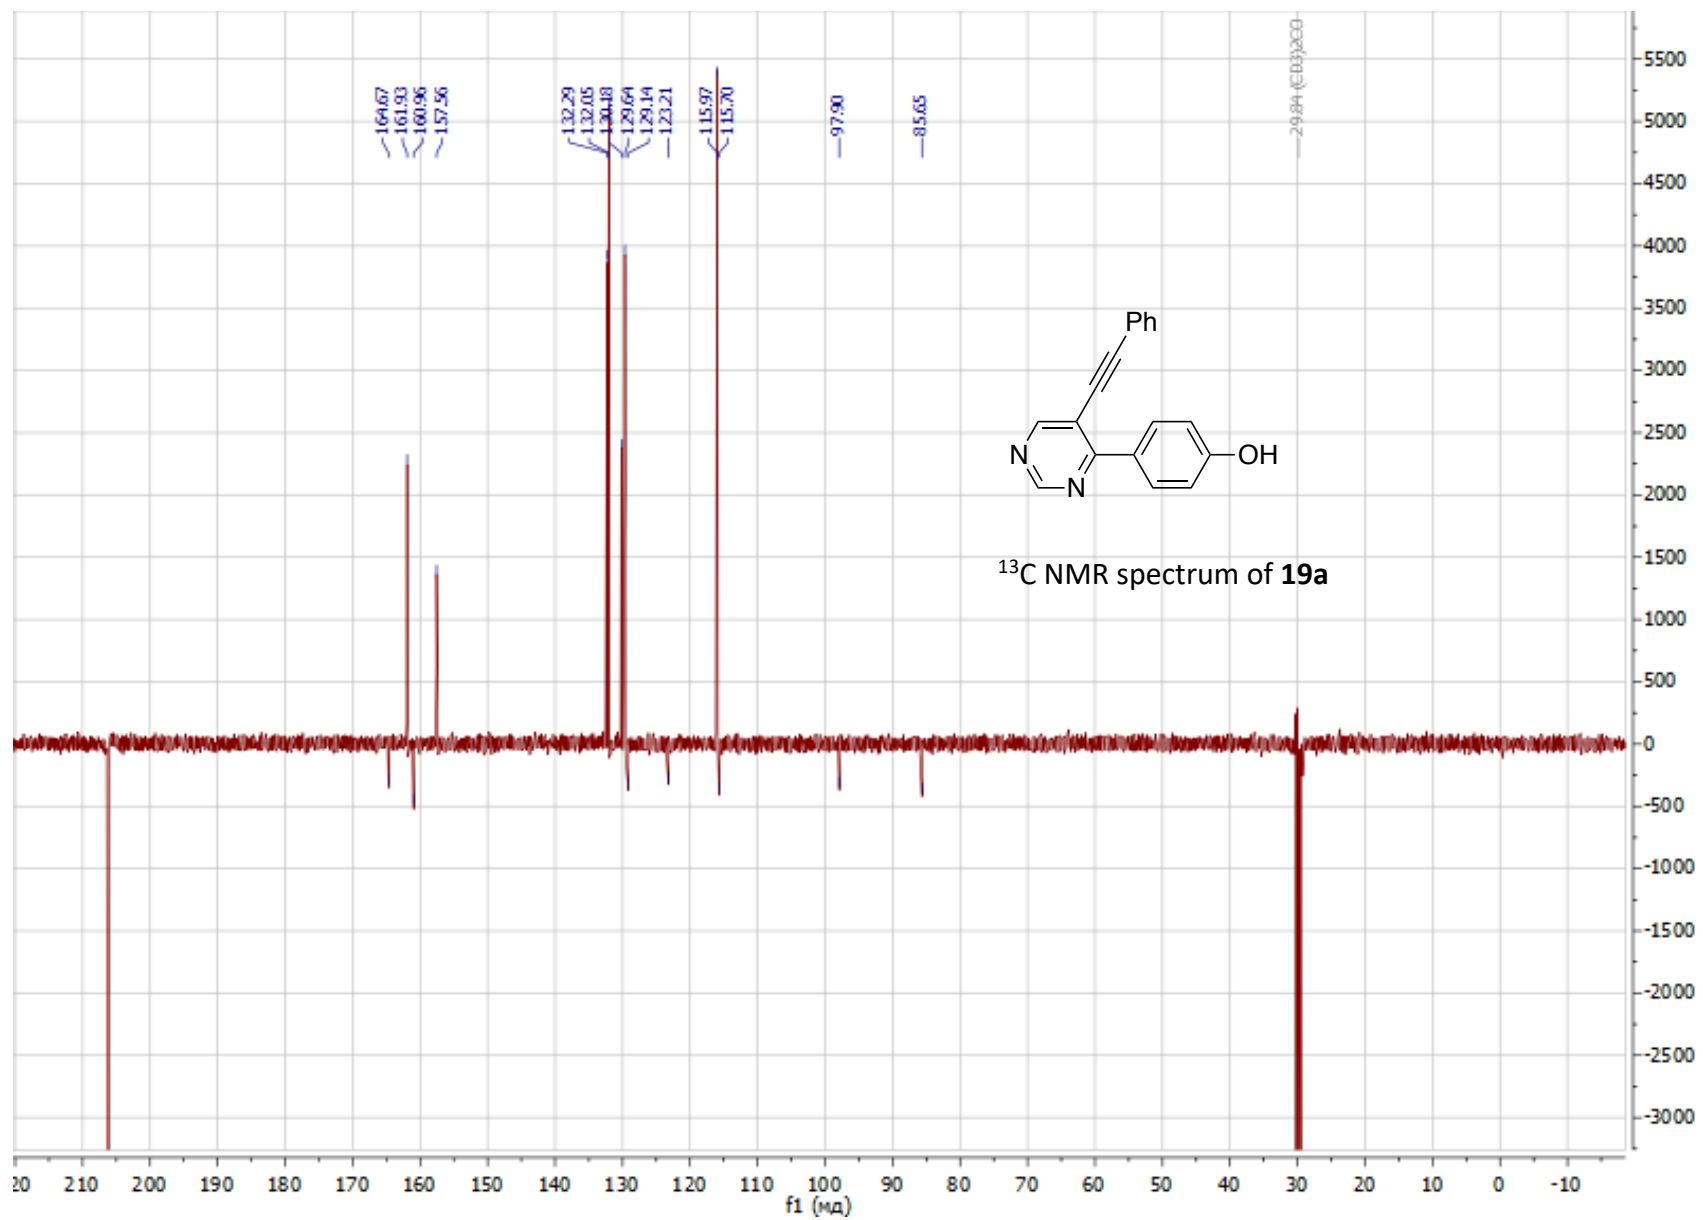

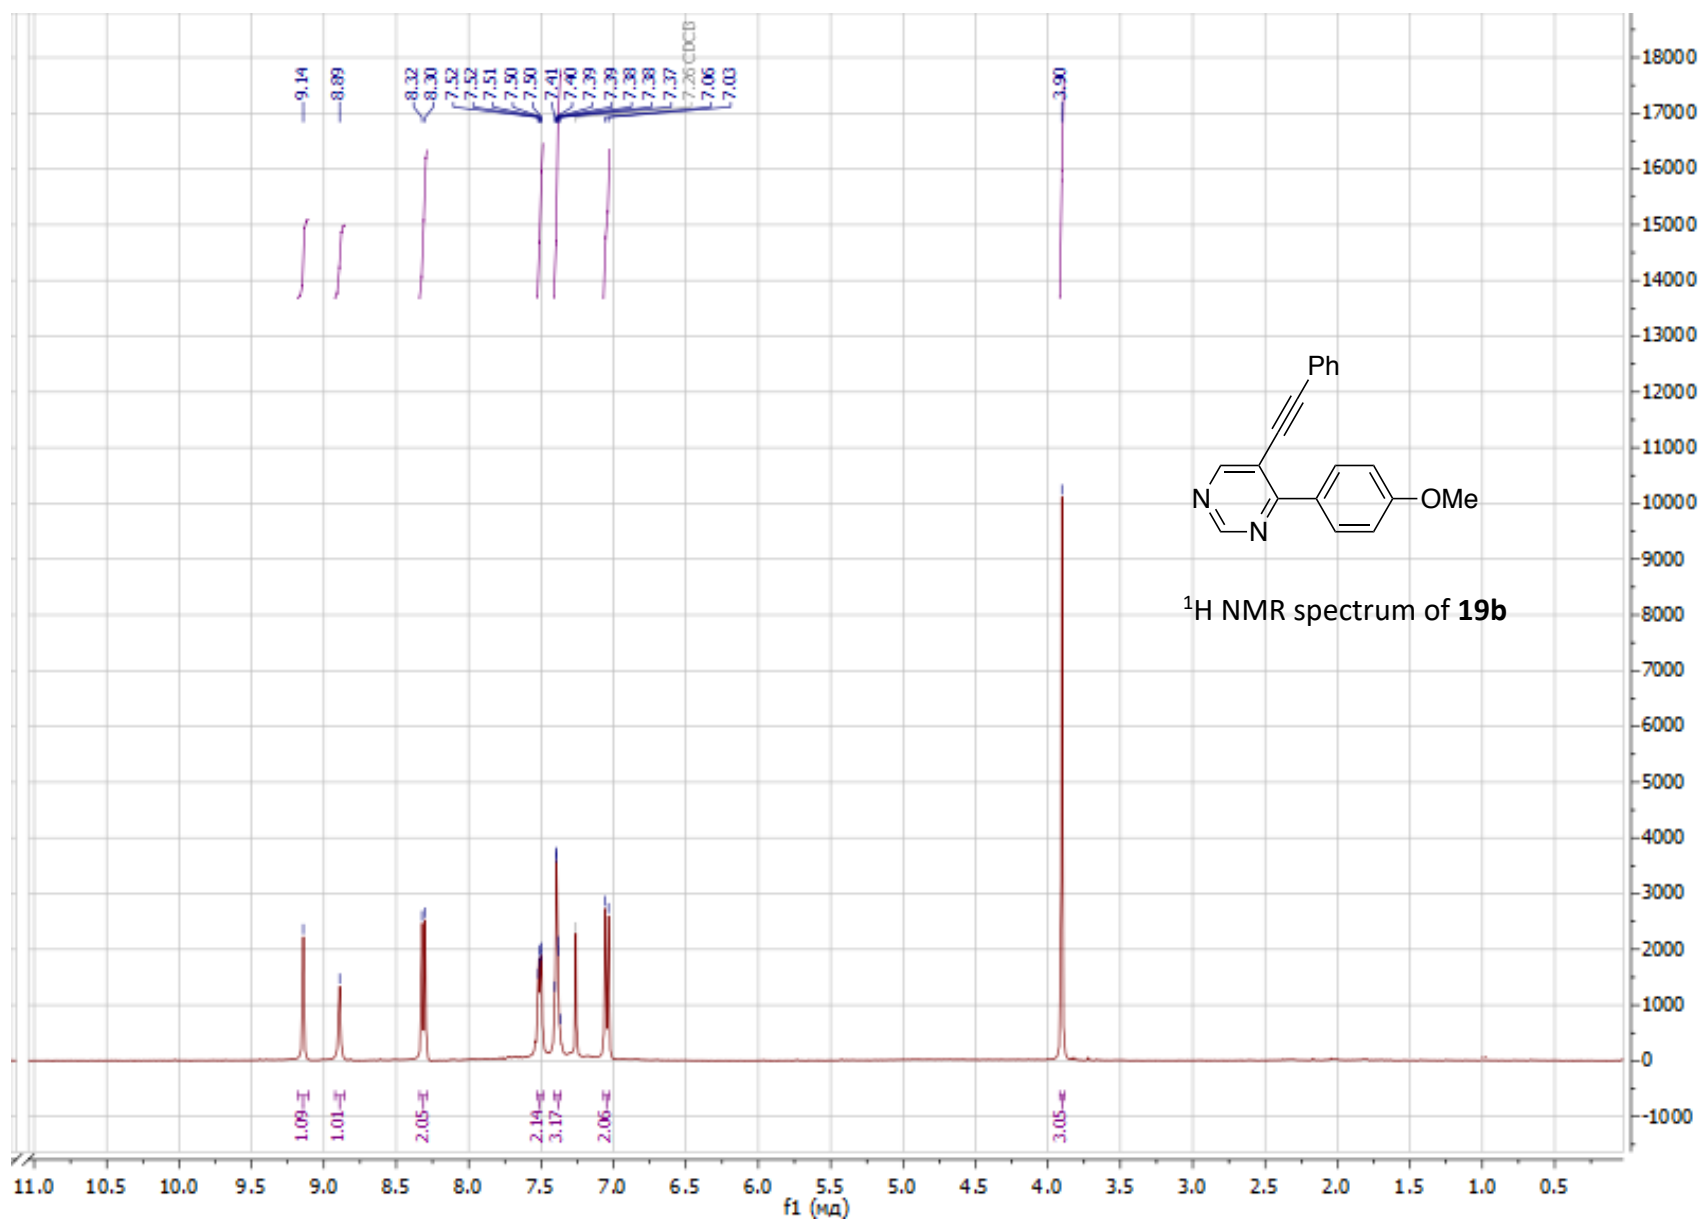

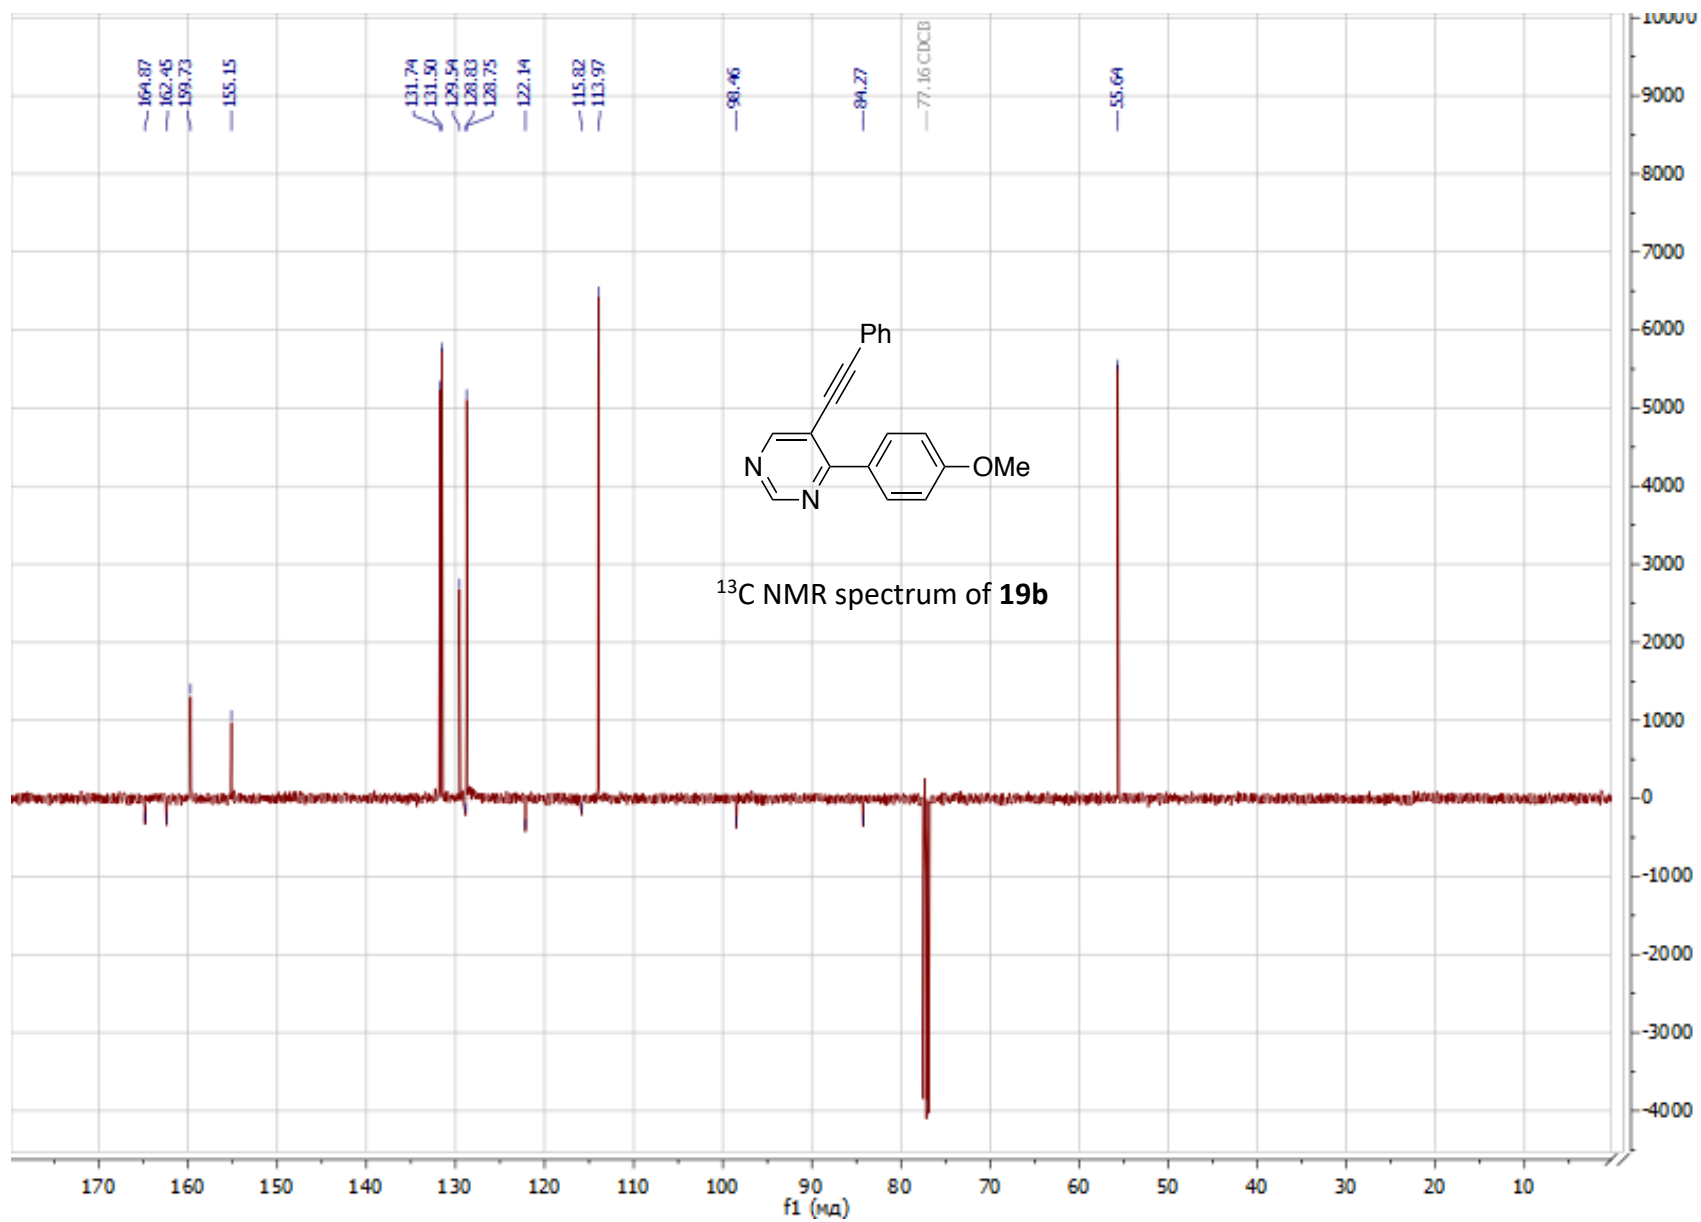

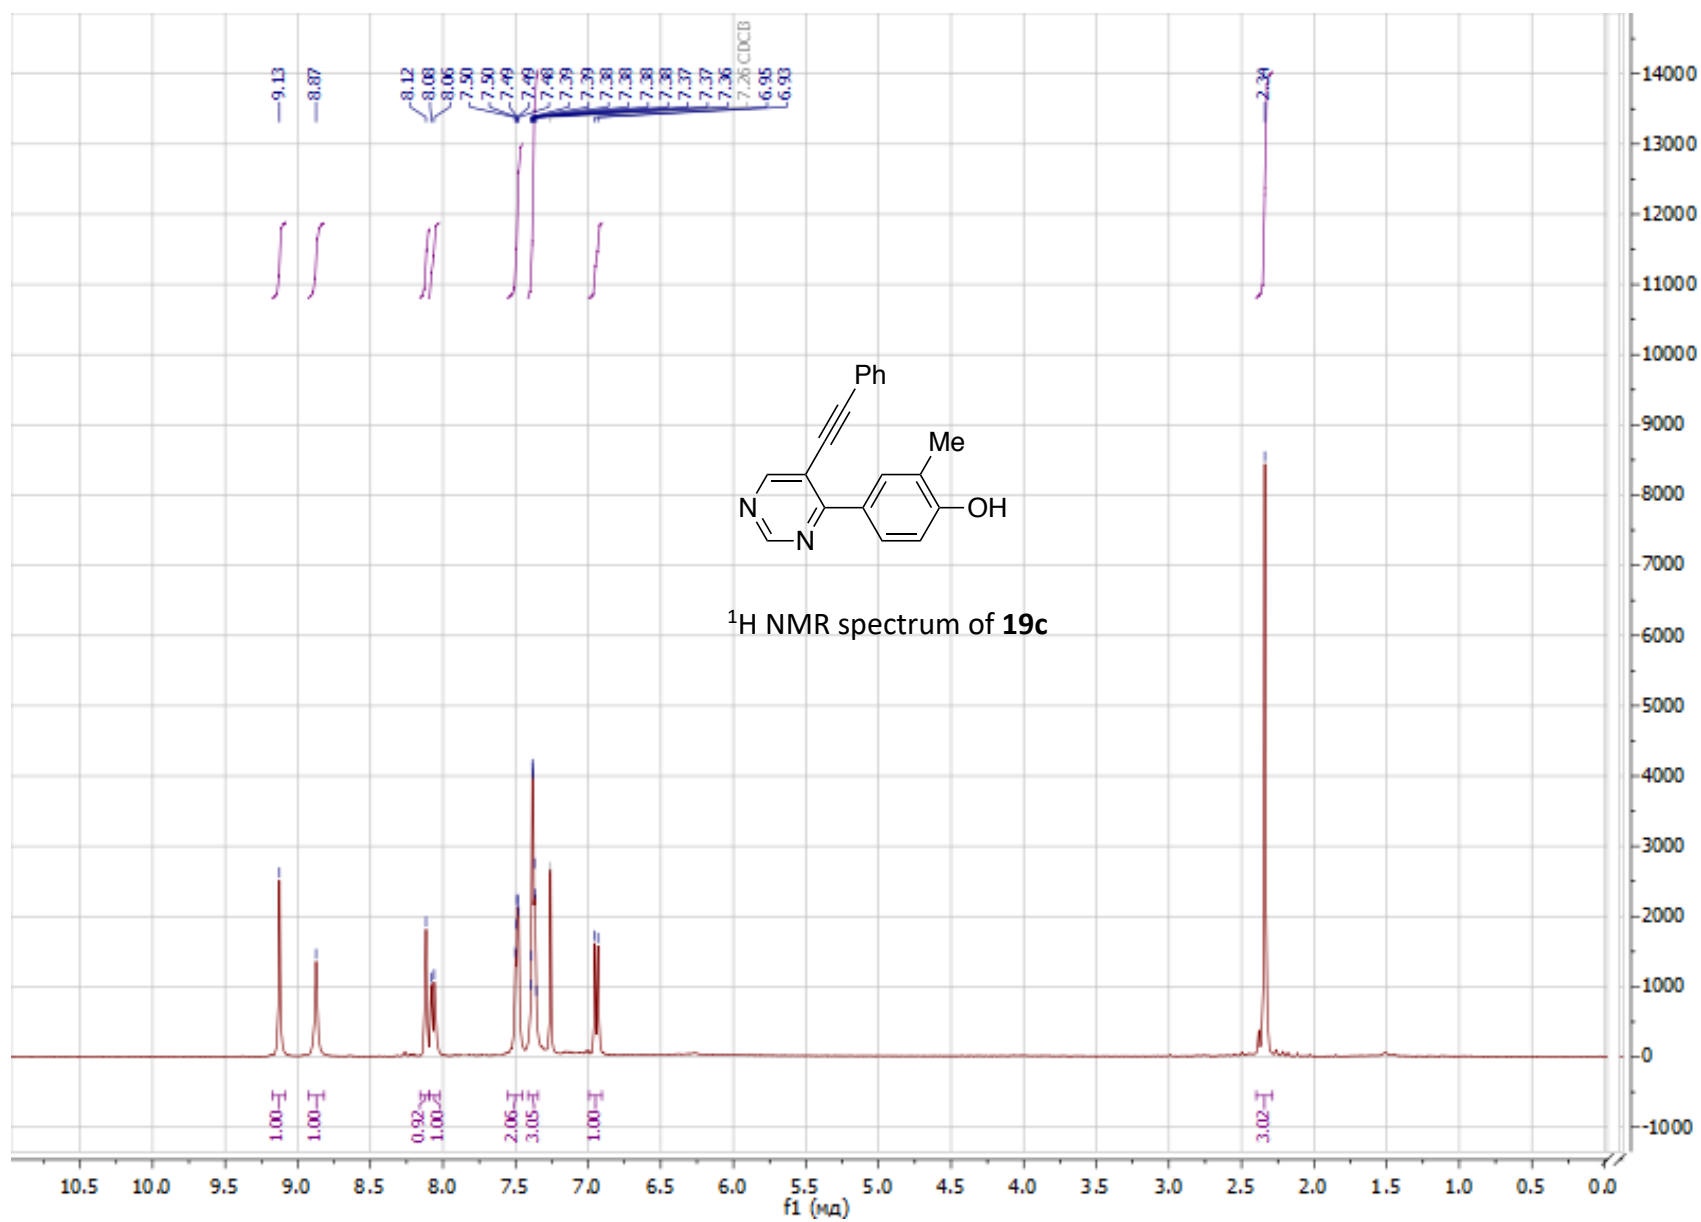



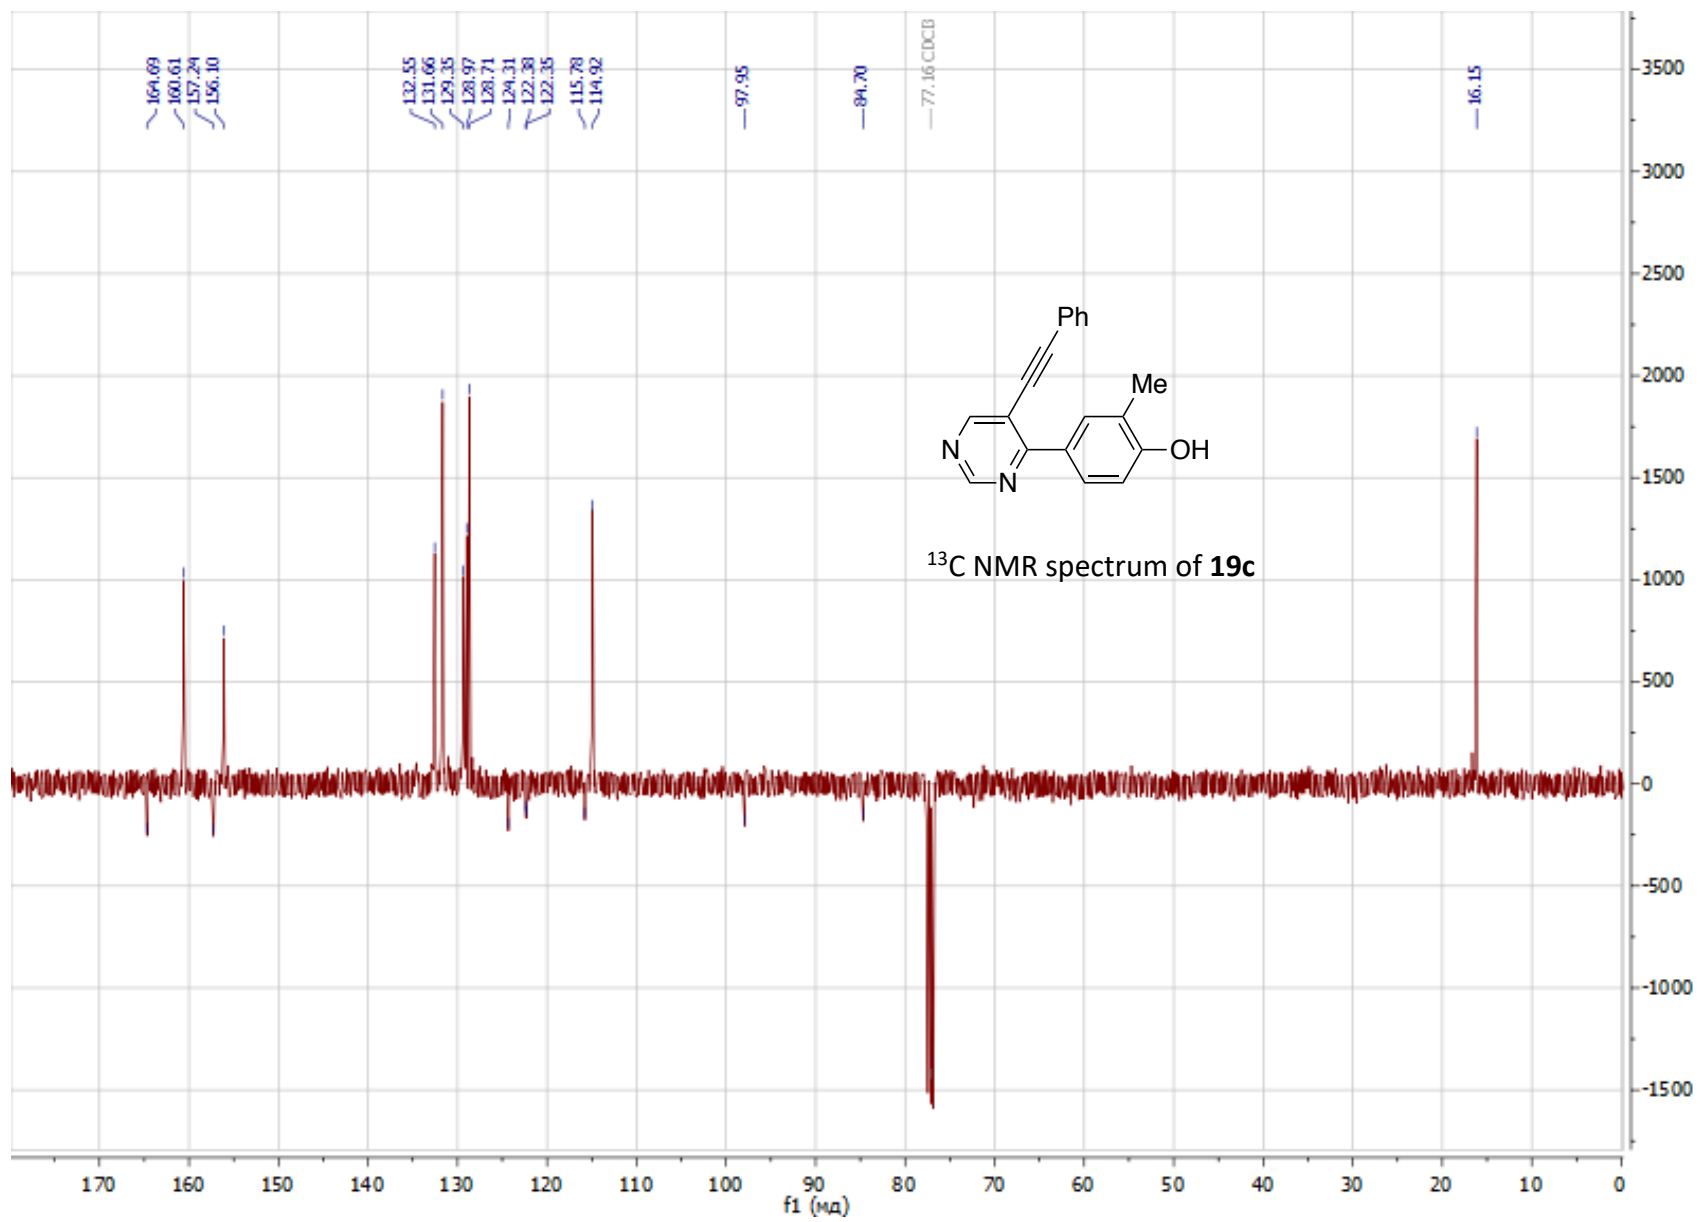

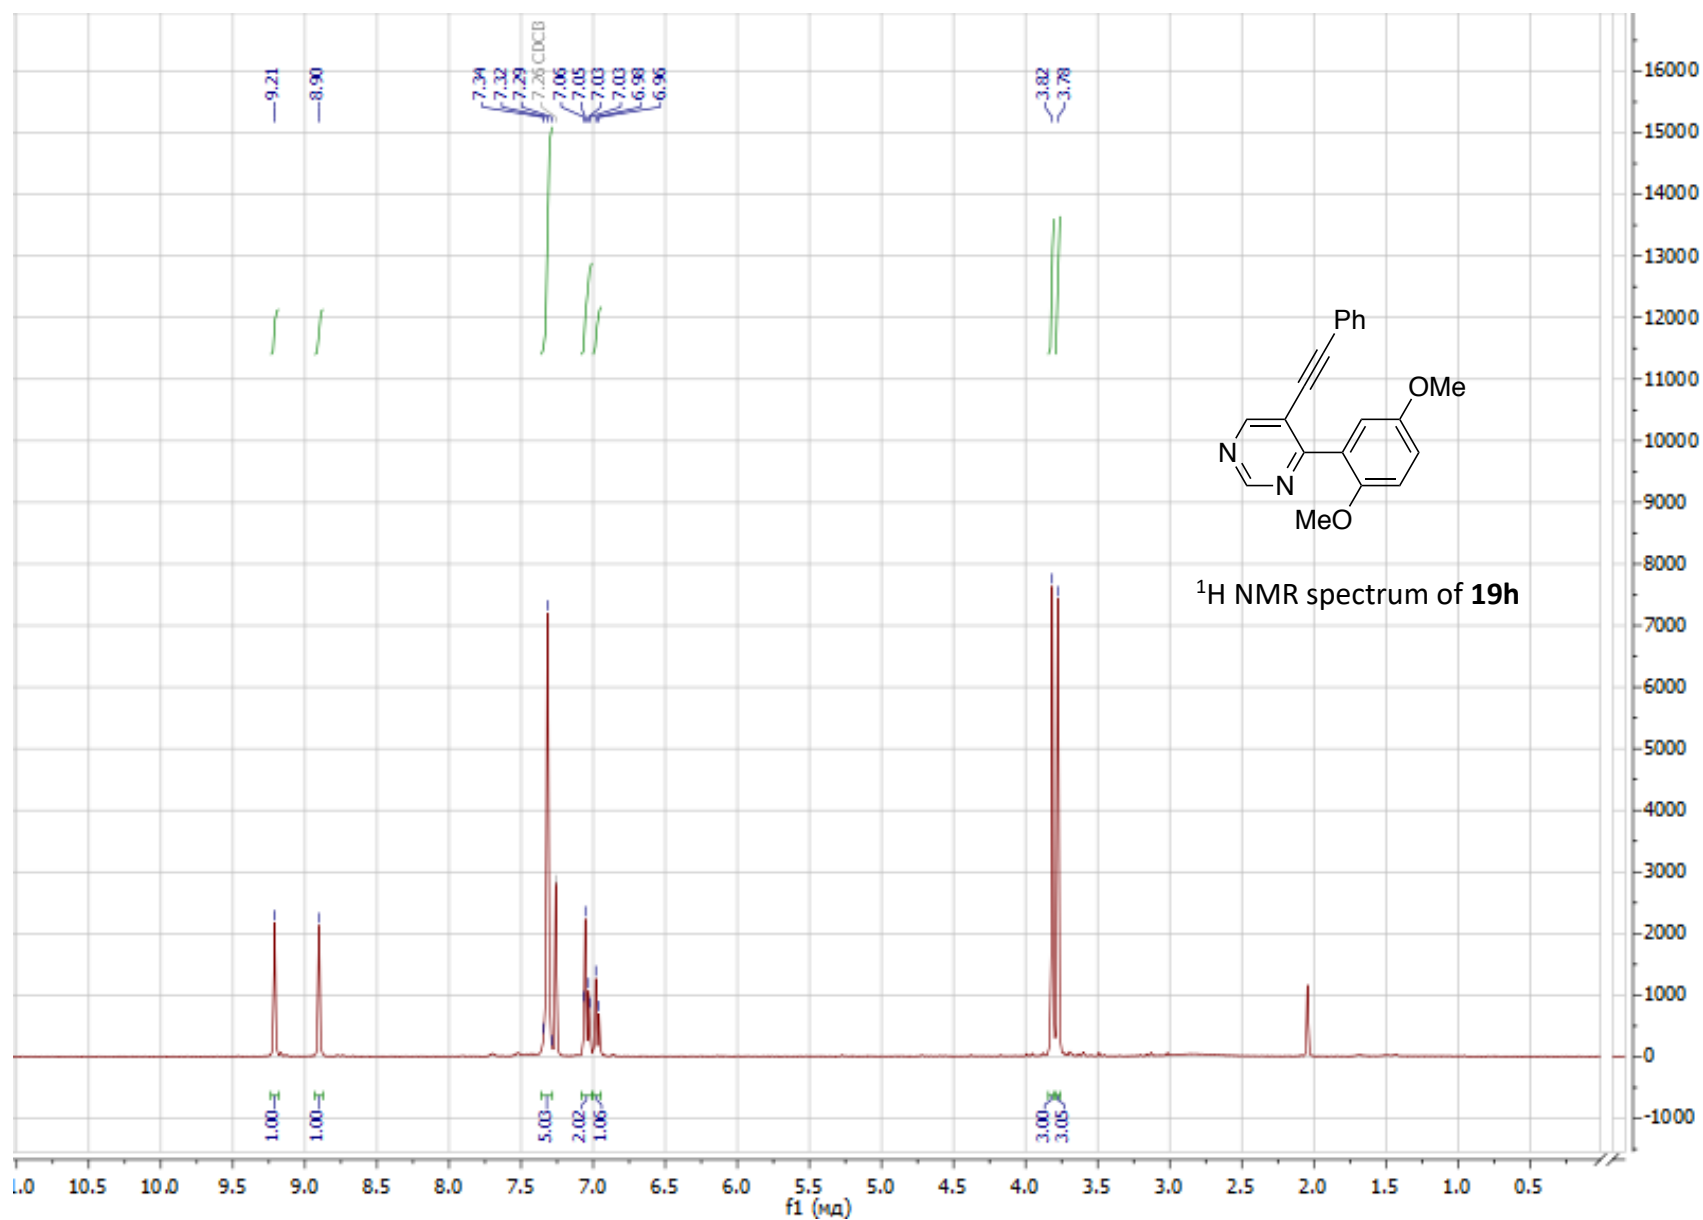

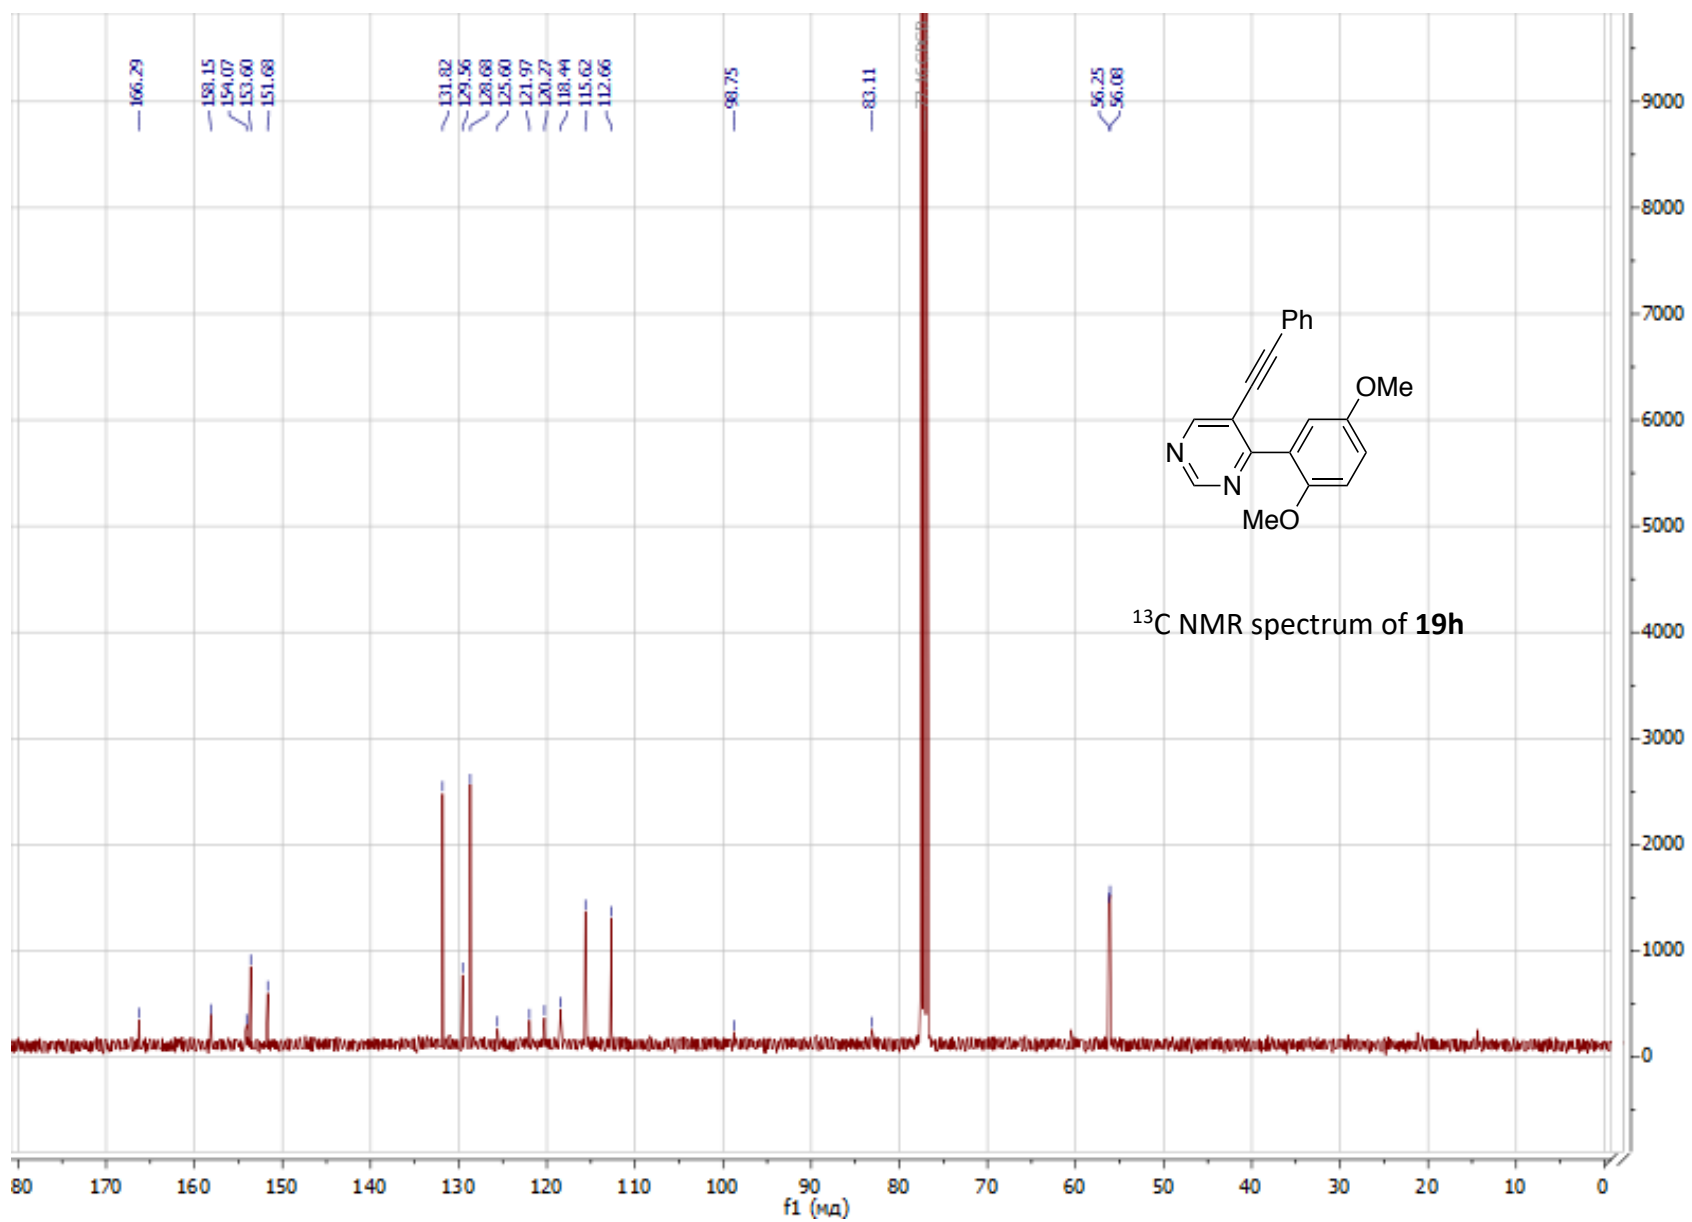

## X-Ray Crystallography Data

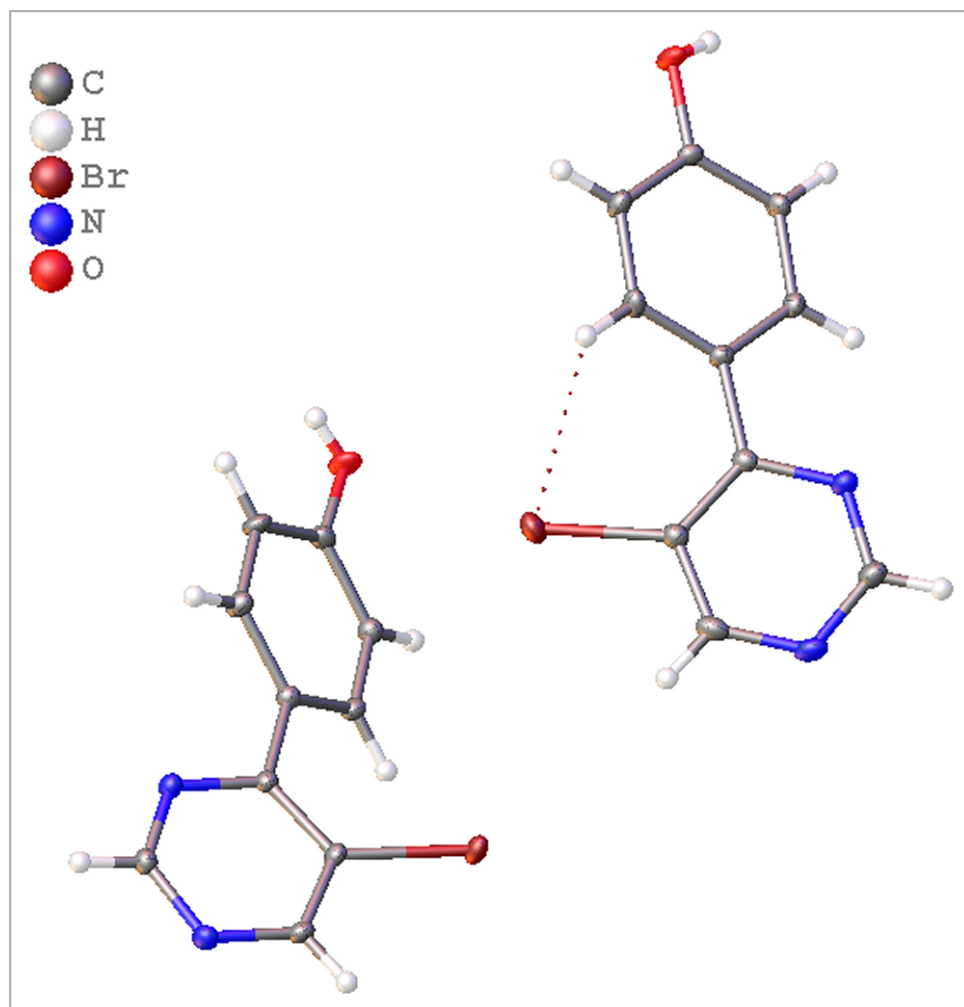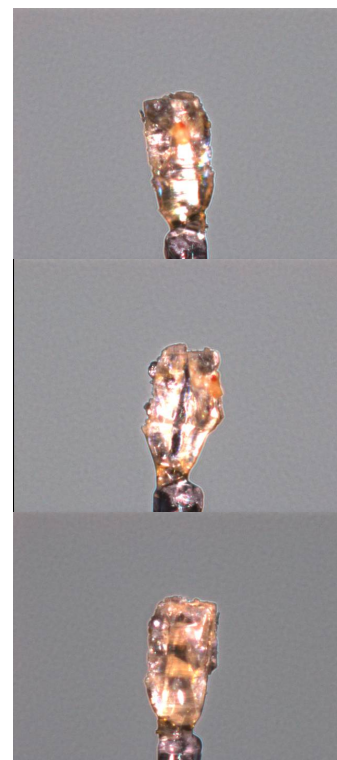

**Figure S1.** ORTEP drawing of compound **20a** (left, CCDC 1983237) showing 50% thermal ellipsoids. Microphotography of the crystal (right).

**Table S1.** Crystal data and structure refinement for **20a**.

|                                             |                                                               |
|---------------------------------------------|---------------------------------------------------------------|
| Identification code                         | ANNA_STAS99604_5                                              |
| Empirical formula                           | C <sub>10</sub> H <sub>7</sub> BrN <sub>2</sub> O             |
| Formula weight                              | 251.09                                                        |
| Temperature/K                               | 100.0(2)                                                      |
| Crystal system                              | triclinic                                                     |
| Space group                                 | P-1                                                           |
| a/Å                                         | 9.0376(2)                                                     |
| b/Å                                         | 9.5049(2)                                                     |
| c/Å                                         | 11.5608(2)                                                    |
| α/°                                         | 77.439(2)                                                     |
| β/°                                         | 76.725(2)                                                     |
| γ/°                                         | 87.542(2)                                                     |
| Volume/Å <sup>3</sup>                       | 943.39(3)                                                     |
| Z                                           | 4                                                             |
| ρ <sub>calc</sub> /cm <sup>3</sup>          | 1.768                                                         |
| μ/mm <sup>-1</sup>                          | 5.662                                                         |
| F(000)                                      | 496.0                                                         |
| Crystal size/mm <sup>3</sup>                | 0.426 × 0.227 × 0.214                                         |
| Radiation                                   | CuKα (λ = 1.54184)                                            |
| 2θ range for data collection/°              | 8.044 to 152.36                                               |
| Index ranges                                | -11 ≤ h ≤ 10, -11 ≤ k ≤ 11, -14 ≤ l ≤ 14                      |
| Reflections collected                       | 19731                                                         |
| Independent reflections                     | 3943 [R <sub>int</sub> = 0.0426, R <sub>sigma</sub> = 0.0228] |
| Data/restraints/parameters                  | 3943/0/262                                                    |
| Goodness-of-fit on F <sup>2</sup>           | 1.084                                                         |
| Final R indexes [I ≥ 2σ (I)]                | R <sub>1</sub> = 0.0295, wR <sub>2</sub> = 0.0762             |
| Final R indexes [all data]                  | R <sub>1</sub> = 0.0311, wR <sub>2</sub> = 0.0780             |
| Largest diff. peak/hole / e Å <sup>-3</sup> | 0.69/-0.65                                                    |

**Table S2.** Fractional Atomic Coordinates ( $\times 10^4$ ) and Equivalent Isotropic Displacement Parameters ( $\text{\AA}^2 \times 10^3$ ) for **20a**.  $U_{\text{eq}}$  is defined as 1/3 of the trace of the orthogonalised  $U_{\text{IJ}}$  tensor.

| Atom | <i>x</i>  | <i>y</i>   | <i>z</i>   |
|------|-----------|------------|------------|
| Br2  | 5699.7(2) | 568.0(2)   | 1734.0(2)  |
| Br1  | 6859.3(3) | 1631.2(3)  | 4926.8(2)  |
| O1   | 9701(2)   | 2857.1(18) | 9509.9(16) |
| O2   | 8735(2)   | 5533.8(19) | 3597.9(17) |
| N4   | 3365(2)   | 4423(2)    | 1226.5(17) |
| N2   | 9046(2)   | -1891(2)   | 6621.5(18) |
| N3   | 2314(2)   | 2781(2)    | 332.9(17)  |
| N1   | 7982(2)   | -2583(2)   | 5122.5(18) |
| C17  | 8148(3)   | 4166(2)    | 2302(2)    |
| C18  | 7670(3)   | 5082(2)    | 3111(2)    |
| C16  | 7108(2)   | 3626(2)    | 1798.9(19) |
| C5   | 8791(2)   | 399(2)     | 7179(2)    |
| C12  | 3356(3)   | 1817(2)    | 629(2)     |
| C3   | 8462(2)   | -552(2)    | 6411.3(19) |
| C14  | 4458(2)   | 3480(2)    | 1499.2(19) |
| C11  | 2357(2)   | 4031(2)    | 683(2)     |
| C8   | 9443(2)   | 2033(2)    | 8758.4(19) |
| C15  | 5571(2)   | 3993(2)    | 2071.7(19) |
| C13  | 4430(2)   | 2113(2)    | 1228(2)    |
| C4   | 7619(3)   | -207(2)    | 5502(2)    |
| C6   | 10063(2)  | 89(2)      | 7696(2)    |
| C19  | 6140(3)   | 5469(2)    | 3387(2)    |
| C7   | 10390(2)  | 902(2)     | 8469(2)    |
| C1   | 7402(3)   | -1265(3)   | 4900(2)    |
| C10  | 7842(2)   | 1530(2)    | 7493(2)    |
| C20  | 5105(3)   | 4941(2)    | 2858(2)    |
| C2   | 8807(3)   | -2819(3)   | 5974(2)    |
| C9   | 8154(3)   | 2329(2)    | 8278(2)    |

**Table S3.** Anisotropic Displacement Parameters ( $\text{\AA}^2 \times 10^3$ ) for **20a**. The Anisotropic displacement factor exponent takes the form:  $-2\pi^2[h^2a^*U_{11}+2hka^*b^*U_{12}+\dots]$ .

| Atom | $U_{11}$  | $U_{22}$  | $U_{33}$  | $U_{23}$  | $U_{13}$   | $U_{12}$ |
|------|-----------|-----------|-----------|-----------|------------|----------|
| Br2  | 17.32(14) | 12.65(14) | 23.15(15) | -8.12(9)  | -9.44(10)  | 5.77(9)  |
| Br1  | 28.10(16) | 18.58(15) | 18.80(15) | -1.47(10) | -12.72(10) | 4.85(10) |
| O1   | 15.9(8)   | 19.6(8)   | 24.3(9)   | -14.9(7)  | -11.4(7)   | 6.4(6)   |
| O2   | 19.5(8)   | 21.1(9)   | 26.2(9)   | -14.8(7)  | -12.5(7)   | 2.8(7)   |
| N4   | 14.3(9)   | 12.3(9)   | 15.7(9)   | -5.1(7)   | -5.9(7)    | 3.0(7)   |
| N2   | 17.1(9)   | 14.9(9)   | 17.5(9)   | -7.6(7)   | -7.1(7)    | 2.5(7)   |
| N3   | 15.9(9)   | 15.4(9)   | 15.6(9)   | -5.7(7)   | -7.7(7)    | 2.4(7)   |
| N1   | 17.1(9)   | 20.8(10)  | 18.8(9)   | -11.5(8)  | -6.1(8)    | 0.5(8)   |
| C17  | 14.0(10)  | 14.7(10)  | 15.4(10)  | -4.5(8)   | -5.3(8)    | 2.0(8)   |
| C18  | 16.4(10)  | 13.3(10)  | 15.1(10)  | -3.8(8)   | -8.1(8)    | -0.6(8)  |
| C16  | 14.5(10)  | 11.9(10)  | 11.6(9)   | -4.6(8)   | -2.4(8)    | 1.2(8)   |
| C5   | 13.4(10)  | 12.6(10)  | 13.7(10)  | -5.0(8)   | -5.1(8)    | 0.4(8)   |
| C12  | 16.7(10)  | 12.9(10)  | 13.8(10)  | -6.4(8)   | -4.6(8)    | 2.1(8)   |
| C3   | 11.3(9)   | 15.1(10)  | 12.0(10)  | -4.4(8)   | -3.2(8)    | 1.0(8)   |
| C14  | 13.3(10)  | 12.1(10)  | 11.1(9)   | -4.4(8)   | -3.7(8)    | 2.5(8)   |
| C11  | 13.9(10)  | 12.9(10)  | 14.8(10)  | -3.4(8)   | -5.3(8)    | 2.9(8)   |
| C8   | 14.1(10)  | 12.7(10)  | 13.2(10)  | -5.4(8)   | -4.1(8)    | -0.6(8)  |
| C15  | 12.1(10)  | 11.9(10)  | 12.4(9)   | -3.2(8)   | -3.6(8)    | 0.2(8)   |
| C13  | 13.2(10)  | 12.3(10)  | 13.8(10)  | -5.5(8)   | -4.2(8)    | 4.1(8)   |
| C4   | 14.7(10)  | 15.4(10)  | 14.2(10)  | -4.0(8)   | -5.6(8)    | 1.8(8)   |
| C6   | 12.9(10)  | 12.6(10)  | 14.8(10)  | -4.7(8)   | -4.3(8)    | 3.5(8)   |
| C19  | 20.6(11)  | 16.6(11)  | 17.7(11)  | -11.3(9)  | -6.5(9)    | 3.3(9)   |
| C7   | 13.3(10)  | 16.9(11)  | 16.4(10)  | -5.9(8)   | -7.9(8)    | 3.7(8)   |
| C1   | 15.9(10)  | 23.8(12)  | 13.8(10)  | -6.1(9)   | -5.3(8)    | -0.9(9)  |
| C10  | 13.6(10)  | 13.2(10)  | 20.1(11)  | -4.2(8)   | -8.9(8)    | 2.9(8)   |
| C20  | 13.6(10)  | 16.4(11)  | 18.5(11)  | -8.0(9)   | -5.5(8)    | 2.9(8)   |
| C2   | 19.4(11)  | 16.4(11)  | 20.9(11)  | -9.4(9)   | -7.0(9)    | 3.7(9)   |
| C9   | 14.5(10)  | 12.6(10)  | 20.5(11)  | -7.0(8)   | -6.7(9)    | 3.3(8)   |

**Table S4.** Bond Lengths for **20a**

| Atom | Atom | Length/Å | Atom | Atom | Length/Å |
|------|------|----------|------|------|----------|
| Br2  | C13  | 1.899(2) | C16  | C15  | 1.398(3) |
| Br1  | C4   | 1.889(2) | C5   | C3   | 1.479(3) |
| O1   | C8   | 1.352(3) | C5   | C6   | 1.406(3) |
| O2   | C18  | 1.348(3) | C5   | C10  | 1.403(3) |
| N4   | C14  | 1.350(3) | C12  | C13  | 1.385(3) |
| N4   | C11  | 1.325(3) | C3   | C4   | 1.410(3) |
| N2   | C3   | 1.351(3) | C14  | C15  | 1.475(3) |
| N2   | C2   | 1.327(3) | C14  | C13  | 1.403(3) |
| N3   | C12  | 1.335(3) | C8   | C7   | 1.395(3) |
| N3   | C11  | 1.341(3) | C8   | C9   | 1.395(3) |
| N1   | C1   | 1.332(3) | C15  | C20  | 1.402(3) |
| N1   | C2   | 1.343(3) | C4   | C1   | 1.385(3) |
| C17  | C18  | 1.399(3) | C6   | C7   | 1.387(3) |
| C17  | C16  | 1.381(3) | C19  | C20  | 1.392(3) |
| C18  | C19  | 1.397(3) | C10  | C9   | 1.385(3) |

**Table S5.** Hydrogen Bonds for **20a**

| D  | H  | A   | d(D-H)/Å | d(H-A)/Å | d(D-A)/Å | D-H-A/° |
|----|----|-----|----------|----------|----------|---------|
| O1 | H1 | N31 | 0.75(4)  | 2.03(4)  | 2.734(3) | 159(4)  |
| O2 | H2 | N12 | 0.74(4)  | 2.02(4)  | 2.737(3) | 166(4)  |



**Table S6. Bond Angles for 20a**

| Atom | Atom | Atom | Angle/°    | Atom | Atom | Atom | Angle/°    |
|------|------|------|------------|------|------|------|------------|
| C11  | N4   | C14  | 118.59(19) | O1   | C8   | C7   | 122.8(2)   |
| C2   | N2   | C3   | 119.2(2)   | O1   | C8   | C9   | 117.6(2)   |
| C12  | N3   | C11  | 115.44(19) | C9   | C8   | C7   | 119.6(2)   |
| C1   | N1   | C2   | 115.2(2)   | C16  | C15  | C14  | 121.81(19) |
| C16  | C17  | C18  | 120.1(2)   | C16  | C15  | C20  | 118.5(2)   |
| O2   | C18  | C17  | 117.0(2)   | C20  | C15  | C14  | 119.58(19) |
| O2   | C18  | C19  | 123.4(2)   | C12  | C13  | Br2  | 116.76(16) |
| C19  | C18  | C17  | 119.6(2)   | C12  | C13  | C14  | 119.3(2)   |
| C17  | C16  | C15  | 121.1(2)   | C14  | C13  | Br2  | 123.80(16) |
| C6   | C5   | C3   | 118.22(19) | C3   | C4   | Br1  | 125.92(17) |
| C10  | C5   | C3   | 123.59(19) | C1   | C4   | Br1  | 115.44(17) |
| C10  | C5   | C6   | 118.0(2)   | C1   | C4   | C3   | 118.5(2)   |
| N3   | C12  | C13  | 121.8(2)   | C7   | C6   | C5   | 120.9(2)   |
| N2   | C3   | C5   | 115.09(19) | C20  | C19  | C18  | 119.9(2)   |
| N2   | C3   | C4   | 117.8(2)   | C6   | C7   | C8   | 120.2(2)   |
| C4   | C3   | C5   | 127.1(2)   | N1   | C1   | C4   | 123.0(2)   |
| N4   | C14  | C15  | 116.05(19) | C9   | C10  | C5   | 121.2(2)   |
| N4   | C14  | C13  | 117.9(2)   | C19  | C20  | C15  | 120.7(2)   |
| C13  | C14  | C15  | 126.08(19) | N2   | C2   | N1   | 126.3(2)   |
| N4   | C11  | N3   | 126.8(2)   | C10  | C9   | C8   | 120.1(2)   |

**Table S7.** Hydrogen Atom Coordinates ( $\text{\AA}\times 10^4$ ) and Isotropic Displacement Parameters ( $\text{\AA}^2\times 10^3$ ) for **20a**

| <b>Atom</b> | <b>x</b>  | <b>y</b> | <b>z</b> | <b>U(eq)</b> |
|-------------|-----------|----------|----------|--------------|
| H17         | 9168.24   | 3919.87  | 2102.57  | 17           |
| H16         | 7435.11   | 3008.82  | 1269.59  | 15           |
| H12         | 3361.83   | 920.73   | 427.42   | 17           |
| H11         | 1600.66   | 4692.86  | 528.34   | 16           |
| H6          | 10694     | -670.49  | 7517.54  | 16           |
| H19         | 5814.6    | 6078.53  | 3923.6   | 20           |
| H7          | 11243.32  | 691.53   | 8796.24  | 17           |
| H1A         | 6825.48   | -1045.76 | 4314.34  | 21           |
| H10         | 6989.12   | 1746.29  | 7166.98  | 18           |
| H20         | 4093.46   | 5220.57  | 3028.94  | 18           |
| H2A         | 9255.35   | -3719.39 | 6124.49  | 21           |
| H9          | 7502.85   | 3064.09  | 8486.13  | 18           |
| H1          | 10470(40) | 2690(40) | 9630(30) | 33(10)       |
| H2          | 8390(40)  | 6030(40) | 4000(40) | 34(10)       |

## Experimental

Single crystals of C<sub>10</sub>H<sub>7</sub>BrN<sub>2</sub>O (**20a**) were re-crystallized from benzene/hexane mixture. A suitable crystal was selected and mounted on the glass stick with acrylic glue. The diffraction spectrum was registered on a SuperNova, Dual, Cu at zero, AtlasS2 diffractometer. The crystal was kept at 100.0(2) K during data collection. Using Olex2,<sup>S1</sup> the structure was solved with the ShelXT<sup>S2</sup> structure solution program using Intrinsic Phasing and refined with the ShelXL<sup>S3</sup> refinement package using Least Squares minimization.

## Crystal structure determination of 20a

**Crystal Data** for C<sub>10</sub>H<sub>7</sub>BrN<sub>2</sub>O (*M* = 251.09 g/mol): triclinic, space group P-1 (no. 2), *a* = 9.0376(2) Å, *b* = 9.5049(2) Å, *c* = 11.5608(2) Å,  $\alpha$  = 77.439(2)°,  $\beta$  = 76.725(2)°,  $\gamma$  = 87.542(2)°, *V* = 943.39(3) Å<sup>3</sup>, *Z* = 4, *T* = 100.0(2) K,  $\mu$ (CuK $\alpha$ ) = 5.662 mm<sup>-1</sup>, *D*<sub>calc</sub> = 1.768 g/cm<sup>3</sup>, 19731 reflections measured (8.044° ≤ 2 $\theta$  ≤ 152.36°), 3943 unique (*R*<sub>int</sub> = 0.0426, *R*<sub>sigma</sub> = 0.0228) which were used in all calculations. The final *R*<sub>1</sub> was 0.0295 (*I* > 2 $\sigma$ (*I*)) and *wR*<sub>2</sub> was 0.0780 (all data).

## Refinement model description

Number of restraints - 0, number of constraints - unknown.

### Details:

1. Fixed Uiso

At 1.2 times of:

All C(H) groups

2.a Aromatic/amide H refined with riding coordinates:

C17 (H17), C16 (H16), C12 (H12), C11 (H11), C6 (H6), C19 (H19), C7 (H7), C1 (H1A),  
C10 (H10), C20 (H20), C2 (H2A), C9 (H9)

---

(S1) Dolomanov, O.V., Bourhis, L.J., Gildea, R.J, Howard, J.A.K. & Puschmann, H. *J. Appl. Cryst.* **2009**, *42*, 339-341.

(S2) Sheldrick, G.M. *Acta Cryst.* **2015**, *A71*, 3-8.

(S3) Sheldrick, G.M. *Acta Cryst.* **2015**, *C71*, 3-8.
